# Supplementary material
Source: PubMed Central journal article supplement (PMC3468693)

## SUPPLEMENTARY MATERIALS

### **A Comparative ‘Bottom Up’ Proteomics Strategy for the Site-specific Identification and Quantification of Protein Modifications By Electrophilic Lipids**

Bingnan Han<sup>1,3</sup>, Michael Hare<sup>2</sup>, Samantha Wickramasekara<sup>2</sup>, Yi Fang<sup>4</sup> and  
Claudia S. Maier<sup>1,2\*</sup>

<sup>1</sup>Department of Chemistry and <sup>2</sup>Environmental Health Sciences Center

Oregon State University, Corvallis, OR 97331

<sup>3</sup>Department of Ocean Science and Engineering,

Zhejiang University, Hangzhou, China 310028

<sup>4</sup>Department of Agricultural and Biological Engineering,

Purdue University, West Lafayette, IN 47906

## **Content**

### **Model Protein Data**

**Figure S1.** Affinity enrichment of HNE conjugated peptides from the d<sub>0</sub>/d<sub>4</sub>- succinic anhydride-labeled tryptic digest of HNE adducted *E. coli* TRX.

**Figure S2.** MALDI tandem mass spectrometric identification of the d<sub>0</sub>/d<sub>4</sub>- succinic anhydride-labeled, HNE-modified peptide T2\*-HNE (m/z 2088.0 and 2096.2) from *E.coli* Trx.

### **Mitochondrial Data**

**Table S1.** Oxylipid peptide conjugates of cardiac mitochondrial proteins identified using Affi gel-Hz enrichment and nanoLC MALDI tandem mass spectrometry.

**Table S2.** Identified oxylipid peptide conjugates of cardiac mitochondrial proteins after post-digestion labeling with succinic anhydride, Affi gel-Hz enrichment and nanoLC MALDI tandem mass spectrometry.

**Table S3.** Comparison of experimental vs expected d<sub>0</sub>/d<sub>4</sub> ratios for oxylipid peptide conjugates from 1:1 mixtures of mitochondrial proteome preparations.

**Figures S3-1 through 34.** MALDI tandem mass spectra of oxylipid peptide conjugates. Peptides were separated by nanoLC (C<sub>18</sub>) and 20sec-fractions spotted onto a MALDI target using a Probot spotter. MALDI-MS/MS analyses were performed on an ABI 4700 ToF/ToF instrument. Precursor ions were selected by a time-gated window of approximately 3-10 Da width. Gas (air) pressure in the collision cell was set to 6 x 10<sup>-7</sup> Torr. A collision energy of 1 kV was used. MS/MS data interpretation was assisted by MASCOT. N.A; not assigned.

Figure S1

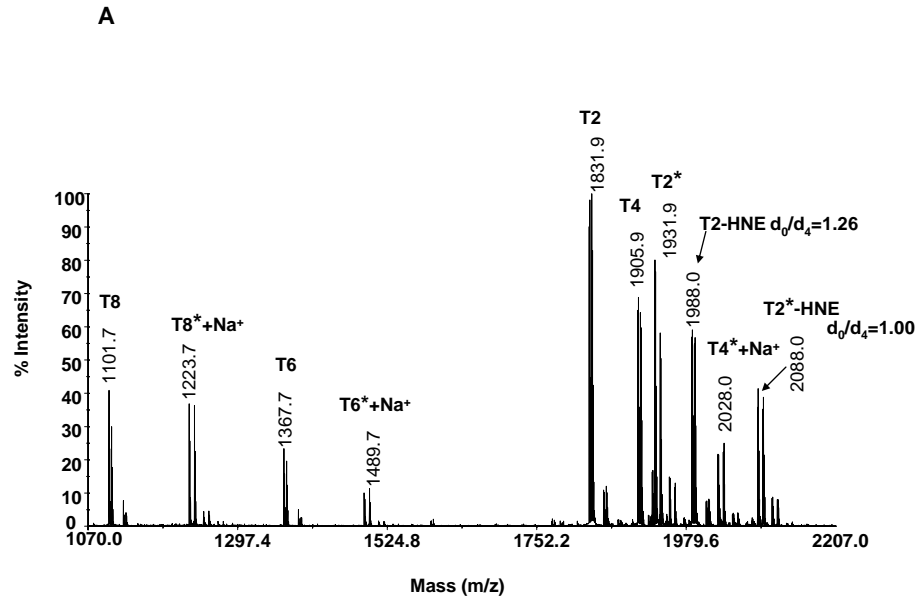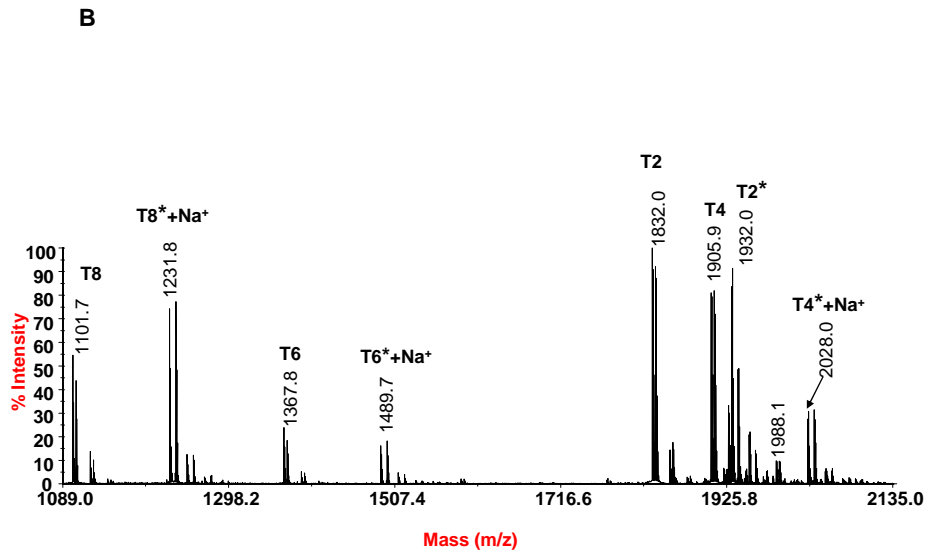

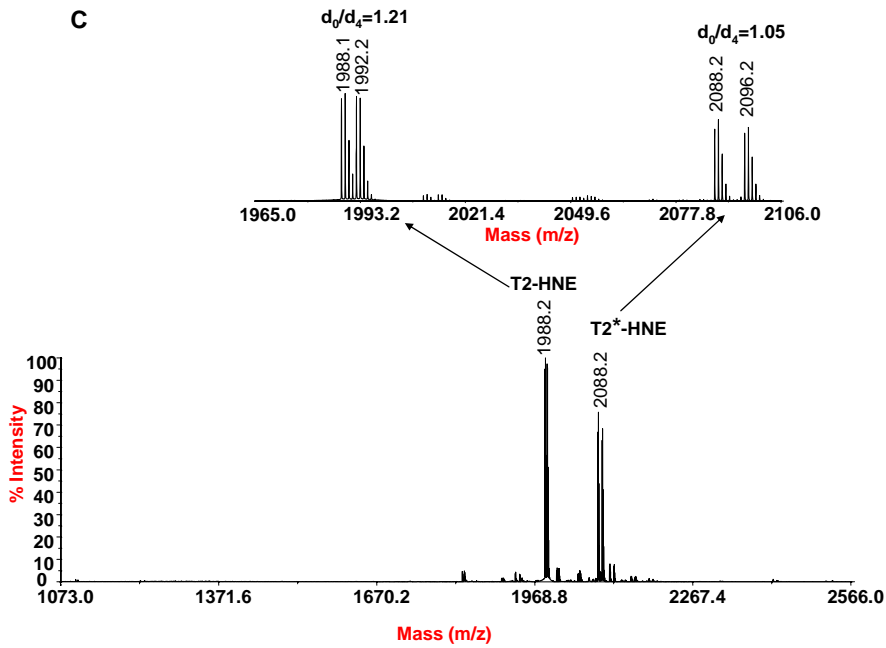

Affinity enrichment of HNE conjugated peptides from the  $d_0/d_4$ - succinic anhydride-labeled tryptic digest of HNE adducted *E. coli* TRX.

(A) MALDI mass spectrum of the unfractionated,  $d_0/d_4$ - succinic anhydride labeled tryptic digest of HNE-modified thioredoxin. The ion pairs at  $m/z$  1988.0, 1992.2 and 2088.0, 2096.2 correlate with tryptic T2-HNE peptides tagged with one or two isotopically labeled succinic anhydrides, respectively.

The following ion pairs containing no HNE were also observed: T2 (1831.9 Da) and T2\* (1931.9 Da), IIHLTDDSFDTDVLK; T4 (1905.9 Da) and T4\* + Na (2028.0 Da), MIAPILDEIADEYQGK; T6 (1367.7 Da) and T6\* + Na (1489.7 Da), LNIDQNPQTAPK; T8 (1101.7 Da) and T8\* + Na (1231.8 Da), GIPTLLLLFK. The peaks annotated with \* represent the bi-succinic anhydride labeled peptide.

(B) MALDI mass spectrum of the capture flow through of the  $d_0/d_4$ -succinic anhydride-labeled tryptic digest of HNE adducted *E. coli* TRX.

(C) MALDI mass spectrum of the enriched fraction containing the  $d_0$  /  $d_4$ - succinic anhydride -labeled HNE-conjugate of peptides T2-HNE and T2\*-HNE. The enriched ion pairs with the expected 1:1 ratio as  $d_0$ -and  $d_4$ -labeled isotopomeric ion pairs from the crude fraction indicated the specificity of this method.

Figure S2.

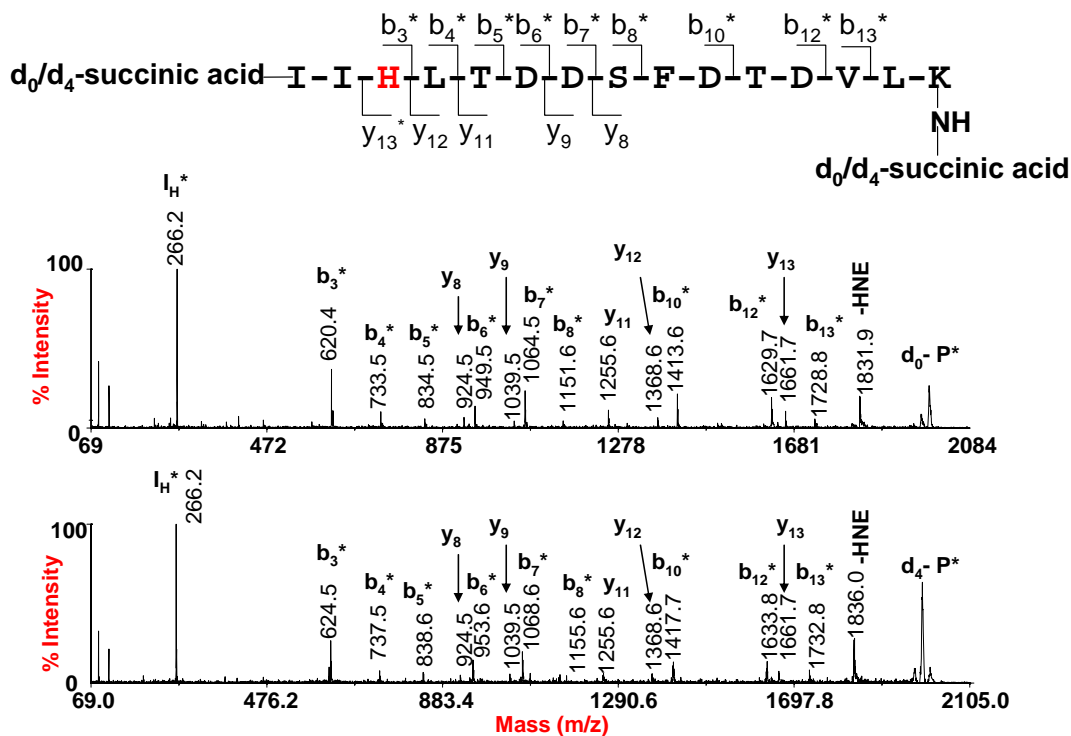

MALDI tandem mass spectrometric identification of the  $d_0/d_4$ - succinic anhydride-labeled, HNE-modified peptide T2\*-HNE ( $m/z$  2088.0 and 2096.2) from *E.coli* Trx. Fragment ions marked with an asterisk \* retained the HNE moiety during high-energy collision induced fragmentation. The ion at  $m/z$  266.2 corresponds to the immonium ion of the HNE-conjugated histidine residue. The prominent ions at  $m/z$  1831.9 and 1836.0 indicate neutral loss of the HNE moiety.

**Table S1.** Oxylipid peptide conjugates of cardiac mitochondrial proteins identified after Affi-gel Hz enrichment and nanoLC separation. Annotated MALDI tandem mass spectra are shown as supplementary materials, Figure S4-1 through S4-34.

| Protein Name                                              | Sprot ID    | Peptide sequence and oxylipid modification | MASCOT score | Residue                             | Figure S3-x |
|-----------------------------------------------------------|-------------|--------------------------------------------|--------------|-------------------------------------|-------------|
| <b>Complex I</b>                                          |             |                                            |              |                                     |             |
| NADH-ubiquinone oxidoreductase 51 kDa subunit             | NUBM_RAT    | NAC*GSDYDFDFVVR <sup>b</sup>               | 87           | C <sup>187</sup>                    | 1           |
|                                                           |             | LVEGC*LVGGR <sup>a</sup>                   | 35           | C <sup>142</sup>                    | 2           |
|                                                           |             | LFNISGHVNHPC*TVEEEMSVPLK <sup>a</sup>      | 19           | C <sup>286</sup>                    | 3           |
| NADH-ubiquinone oxidoreductase 75 kDa subunit             | NUAM_RAT    | VDSDNLC*TEEIFPTEGAGTDLR <sup>a</sup>       | 54           | C <sup>367</sup>                    | 4           |
| NADH-ubiquinone oxidoreductase 9.6kDa subunit             | ACPM_MOUSE  | LMC*PQEIVDYIADKK <sup>a</sup>              | 76           | C <sup>140</sup>                    | 5           |
| NADH-ubiquinone oxidoreductase chain 3                    | NU3M_RAT    | ANPYEC*GFDPTSSAR <sup>a</sup>              | 50           | C <sup>39</sup>                     | 6           |
| NADH dehydrogenase 1 alpha subcomplex subunit 5           | NDUA5_RAT   | TTGLVGLAVC*DTPHER <sup>a</sup>             | 41           | C <sup>16</sup>                     | 7           |
| NADH dehydrogenase 1 alpha subcomplex subunit 6           | NDUA6_MOUSE | FFH*ETETPRPK <sup>b</sup>                  | 21           | H <sup>111</sup>                    | 8           |
| NADH dehydrogenase 1 alpha subcomplex subunit 7           | NDUA7_MOUSE | LSNNYYC*TR <sup>a</sup>                    | 37           | C <sup>54</sup>                     | 9           |
| <b>Complex II</b>                                         |             |                                            |              |                                     |             |
| Succinate dehydrogenase [ubiquinone] flavoprotein subunit | DHSA_RAT    | TYFSC* TSAHTSTGDGTAMVTR <sup>a,d</sup>     | 92           | C <sup>258</sup>                    | 10,11       |
|                                                           |             | GVIALC*IEDGSIHR <sup>a</sup>               | 31           | C <sup>238</sup>                    | 12          |
|                                                           |             | TLNEADC*ATVPPAIR <sup>a</sup>              | 54           | C <sup>646</sup>                    | 13          |
| <b>Complex III</b>                                        |             |                                            |              |                                     |             |
| Ubiquinol-cytochrome-c reductase complex core protein I   | UQCR1_MOUSE | NALISH*LDGTTTPVC*EDIGR <sup>a,b</sup>      | 56           | H <sup>402</sup> , C <sup>410</sup> | 14          |
|                                                           |             | NALISHLDGTTTPVC*EDIGR <sup>a</sup>         | 45           | C <sup>410</sup>                    | 15          |

|                                                          |           |                                                               |    |                  |       |
|----------------------------------------------------------|-----------|---------------------------------------------------------------|----|------------------|-------|
| Ubiquinol-cytochrome-c reductase complex core protein II | UQCR2_RAT | NALANPLYC*PDYR <sup>a,b,c,d</sup>                             | 66 | C <sup>191</sup> | 16-19 |
| Cytochrome c1, heme protein, mitochondrial               | CY1_MOUSE | HLVGVC*YTEEEAK <sup>a</sup>                                   | 86 | C <sup>139</sup> | 20    |
| <b>Complex IV</b>                                        |           |                                                               |    |                  |       |
| Cytochrome c oxidase subunit VIa isoform 2               | CX6A2_RAT | GDH*GGAGANTWR <sup>b,c</sup><br>HNPH*VNPLPTGYEQP <sup>b</sup> | 28 | H <sup>20</sup>  | 21,22 |
|                                                          |           |                                                               | 35 | H <sup>83</sup>  | 23    |
| Cytochrome c oxidase subunit VIb isoform 1               | CX6B1_RAT | GGDVSV*EWYR <sup>b</sup>                                      | 23 | C <sup>53</sup>  | 24    |
| Cytochrome c oxidase subunit VIIa isoform 2              | CX7A2_RAT | LFQEDNGMPVH*LK <sup>b</sup>                                   | 42 | H <sup>44</sup>  | 25    |
| <b>Complex V</b>                                         |           |                                                               |    |                  |       |
| ATP synthase beta subunit                                | ATPβ_RAT  | IMDPNIVGSEH*YDVAR <sup>b</sup>                                | 81 | H <sup>417</sup> | 26    |
| ATP synthase O subunit                                   | ATPO_RAT  | GEVPC*TVTTAFPLDEAVLSELK <sup>a</sup>                          | 72 | C <sup>141</sup> | 27    |
| <b>Citric Acid Cycle</b>                                 |           |                                                               |    |                  |       |
| Aconitate hydratase                                      | ACON_RAT  | VAVPSTIH*CDHLIEAQLGGEK <sup>a</sup>                           | 30 | H <sup>125</sup> | 28    |
| Malate dehydrogenase                                     | MDHM_RAT  | GYLGPQLPDC*LK <sup>a</sup>                                    | 37 | C <sup>89</sup>  | 29    |
| <b>β-Oxidation</b>                                       |           |                                                               |    |                  |       |
| Long-chain fatty-acid-CoA ligase 1                       | ACSL1_RAT | GIQVSNDGPC*LGSR <sup>a</sup>                                  | 28 | C <sup>109</sup> | 30    |
| <b>Other</b>                                             |           |                                                               |    |                  |       |
| ADP/ATP translocase 1                                    | ADT1_RAT  | GADIMYTGTVDC*WR <sup>a,b</sup><br>EFNGLGDC*LTK <sup>a</sup>   | 79 | C <sup>256</sup> | 31,32 |
|                                                          |           |                                                               | 61 | C <sup>159</sup> | 33    |
| Voltage-dependent anion-selective channel protein 1      | VDAC1_RAT | EHINLGC*DVFDFDIAGPSIR <sup>a</sup>                            | 68 | C <sup>140</sup> | 34    |

<sup>1</sup> The site of oxylipid conjugation is marked with an asterisk (\*). The chemical nature of the oxylipid modification is indicated by the following superscripts: a, acrolein, b, HHE, c, ONE, d, HNE.



**Table S2.** Identified oxylipid peptide conjugates of cardiac mitochondrial proteins after post-digestion labeling with succinic anhydride, Affi gel-Hz enrichment and nanoLC MALDI tandem mass spectrometry.

| Protein Name                                              | Sprot ID    | Peptide sequence                      | MASCOT score | Residue          |
|-----------------------------------------------------------|-------------|---------------------------------------|--------------|------------------|
| <b>Complex I</b>                                          |             |                                       |              |                  |
| NADH-ubiquinone oxidoreductase 13 kDa-A subunit           | NUMM_MOUSE  | ITH*TGQVYDEK <sup>b</sup>             | 70           | H <sup>33</sup>  |
| NADH dehydrogenase [ubiquinone] iron-sulfur protein 3     | NDUS3_MOUSE | ILTDYGFEGH*PFR <sup>b</sup>           | 28           | H <sup>195</sup> |
| NADH-ubiquinone oxidoreductase 75 kDa subunit             | NDUS1_RAT   | VSDNLC*TEEIFPTEGAGTDLR <sup>b</sup>   | 81           | C <sup>367</sup> |
| NADH dehydrogenase 1 alpha subcomplex subunit 5           | NDUA5_RAT   | TTGLVGLAVC*DTPHER <sup>a</sup>        | 51           | C <sup>16</sup>  |
| NADH dehydrogenase 1 alpha subcomplex subunit 10          | NDUAA_MOUSE | KQC*VDHYNEIK <sup>a</sup>             | 78           | C <sup>183</sup> |
| <b>Complex II</b>                                         |             |                                       |              |                  |
| Succinate dehydrogenase [ubiquinone] flavoprotein subunit | DHSA_RAT    | GVIALC*IEDGSIHR <sup>a</sup>          | 33           | C <sup>238</sup> |
|                                                           |             | TYFSC* TSAHTSTGDGTAMVTR <sup>a</sup>  | 124          | C <sup>258</sup> |
|                                                           |             | TLNEADC*ATVPPAIR <sup>a,b</sup>       | 68           | C <sup>646</sup> |
| Succinate dehydrogenase [ubiquinone]iron-sulfur protein   | DHSB_MOUSE  | IK*NEVDSTLTFR <sup>b</sup>            | 38           | K <sup>82</sup>  |
| <b>Complex III</b>                                        |             |                                       |              |                  |
| Ubiquinol-cytochrome-c reductase complex core protein I   | UQCR1_MOUSE | NALISHLDGTTTPVC*EDIGR <sup>a,b</sup>  | 73           | C <sup>410</sup> |
|                                                           |             | YFYDQC*PAVAGYGPIEQLSDYNR <sup>b</sup> | 33           | C <sup>453</sup> |
| Ubiquinol-cytochrome-c reductase complex core protein II  | UQCR2_RAT   | NALANPLYC*PDYR <sup>a,b,c,d</sup>     | 77           | C <sup>191</sup> |
| Cytochrome c1, heme protein, mitochondrial                | CY1_MOUSE   | HLVGVV*YTEEEAK <sup>a</sup>           | 117          | C <sup>139</sup> |
| <b>Complex IV</b>                                         |             |                                       |              |                  |
| Cytochrome c oxidase subunit VIa isoform 2                | CX6A2_RAT   | GDH*GGAGANTWR <sup>a,b,c</sup>        | 88           | H <sup>20</sup>  |
| Cytochrome c oxidase subunit VIb isoform 1                | CX6B1_RAT   | GGDVSVV*EWYR <sup>b</sup>             | 28           | C <sup>53</sup>  |
| Cytochrome c oxidase subunit VIIa isoform 2               | CX7A2_RAT   | LFQEDNGMPVH*LK <sup>b</sup>           | 51           | H <sup>44</sup>  |
| Cytochrome c oxidase subunit 4 isoform 1                  | COX41_RAT   | DYPLPDVAH*VK <sup>b</sup>             | 41           | H <sup>51</sup>  |
| Cytochrome c oxidase subunit 3                            | COX3_RAT    | EGTYQGHH*TPIVQK <sup>b</sup>          | 56           | H <sup>71</sup>  |
| Cytochrome c oxidase polypeptide VIc                      | COX7C_RAT   | SH*YEEGPGK <sup>b</sup>               | 41           | H <sup>18</sup>  |

| <b>Complex V</b>                                    |                  |                                    |    |                  |
|-----------------------------------------------------|------------------|------------------------------------|----|------------------|
| ATP synthase beta subunit                           | ATP $\beta$ _RAT | IMDPNIVGSEH*YDVAR <sup>b, c</sup>  | 71 | H <sup>417</sup> |
|                                                     |                  | EGNDLYH*EMIESGVINLK <sup>b</sup>   | 71 | H <sup>248</sup> |
| ATP synthase B chain                                | AT5F1_RAT        | EGEH*MINWVEK <sup>b</sup>          | 42 | H <sup>214</sup> |
| <b>Citric Acid Cycle</b>                            |                  |                                    |    |                  |
| Malate dehydrogenase                                | MDHM_RAT         | VNVPVIGGH*AGK <sup>b</sup>         | 30 | H <sup>200</sup> |
| Isocitrate dehydrogenase [NADP]                     | IDHP_RAT         | HAH*GDQYK <sup>b</sup>             | 41 | H <sup>247</sup> |
| Creatine kinase, sarcomeric mitochondrial precursor | KCRS_RAT         | ITH*GQFDER <sup>b</sup>            | 29 | H <sup>152</sup> |
| <b><math>\beta</math>-Oxidation</b>                 |                  |                                    |    |                  |
| Long-chain specific acyl-CoA dehydrogenase          | ACADL_RAT        | C*IGAIAMTEPGAGSDLQGVR <sup>b</sup> | 40 | C <sup>166</sup> |
|                                                     |                  | AFVDSC*LQLHETK <sup>a</sup>        | 81 | C <sup>351</sup> |
| Acetyl-CoA acetyltransferase                        | THIL_RAT         | IHMGNC*AENTAK <sup>a</sup>         | 45 | C <sup>193</sup> |
| <b>Other</b>                                        |                  |                                    |    |                  |
| ADP/ATP translocase 1                               | ADT1_RAT         | GADIMYTGTVDC*WR <sup>a, b</sup>    | 48 | C <sup>256</sup> |
|                                                     |                  | LLLQVQH*ASK <sup>b</sup>           | 72 | H <sup>39</sup>  |
| NAD(P) transhydrogenase, mitochondrial precursor    | NNTM_MOUSE       | AISPDKDNFH*FEVK <sup>b</sup>       | 40 | H <sup>407</sup> |
|                                                     |                  | GITH*IGYTDLPSR <sup>b</sup>        | 40 | H <sup>370</sup> |

<sup>1</sup> The site of oxylipid conjugation is marked with an asterisk (\*). The chemical nature of the oxylipid modification is indicated by the following superscripts: a, acrolein, b, HHE, c, ONE, d, HNE.

**Table S3.** Comparison of experimental vs expected  $d_0/d_4$  ratios for oxylipid peptide conjugates from 1:1 mixtures of mitochondrial proteome preparations. After post-digestion labeling with  $d_0$ - and  $d_4$ -succinic anhydride, respectively, labeled mixtures were combined, subjected to AffiGel-Hz enrichment and analyzed by nanoLC MALDI-MS/MS.

| Spot ID             | Peptide sequence <sup>1</sup>        | $d_0 / d_4$ (Expected Ratio = 1.00), n=3 |             |             |         |        |
|---------------------|--------------------------------------|------------------------------------------|-------------|-------------|---------|--------|
|                     |                                      | sample 1                                 | sample 2    | sample 3    | Average | ± SD   |
| NDUA5_RAT           | TTGLVGLAVC*DTPHER <sup>a</sup>       | 0.84                                     | 0.97        | 0.85        | 0.89    | ± 0.07 |
| DHSA_RAT            | TLNEADC*ATVPPAIR <sup>a</sup>        | 1.15                                     | 1.23        | 1.05        | 1.14    | ± 0.09 |
|                     | TYFSC* TSAHTSTGDGTAMVTR <sup>a</sup> | 1.04                                     | 1.08        | 1.09        | 1.07    | ± 0.03 |
| UQCR2_RAT           | NALANPLYC*PDYR <sup>a</sup>          | 1.23                                     | 1.05        | 1.12        | 1.13    | ± 0.09 |
|                     | NALANPLYC*PDYR <sup>b</sup>          | 0.97                                     | 0.95        | 1.01        | 0.98    | ± 0.03 |
| CX6A2_RAT           | GDH*GGAGANTWR <sup>a</sup>           | 1.17                                     | 1.05        | 1.04        | 1.09    | ± 0.07 |
|                     | GDH*GGAGANTWR <sup>b</sup>           | 0.96                                     | 0.99        | 1.01        | 0.99    | ± 0.03 |
|                     | GDH*GGAGANTWR <sup>c</sup>           | 0.91                                     | 0.96        | 1.24        | 1.04    | ± 0.18 |
| CX7A2_RAT           | LFQEDNGMPVH*LK <sup>b</sup>          | 1.00                                     | 1.02        | 0.85        | 0.96    | ± 0.09 |
| COX41_RAT           | DYPLPDVAH*VK <sup>b</sup>            | 0.90                                     | 1.05        | 0.98        | 0.98    | ± 0.08 |
| COX3_RAT            | EGTYQGHH*TPIVQK <sup>b</sup>         | 1.48                                     | 1.00        | 1.03        | 1.17    | ± 0.27 |
| CX6B1_RAT           | GGDVSVC*EWYR <sup>b</sup>            | 1.05                                     | 1.01        | 0.96        | 1.01    | ± 0.05 |
| ATPβ_RAT            | IMDPNIVGSEH*YDVAR <sup>b</sup>       | 1.15                                     | 1.05        | 1.02        | 1.07    | ± 0.07 |
| KCRS_RAT            | ITH*GQFDER <sup>b</sup>              | 0.97                                     | 0.90        | 0.96        | 0.94    | ± 0.04 |
| MDHM_RAT            | GC*DVVVIPAGVPR <sup>b</sup>          | 0.96                                     | 1.26        | 1.03        | 1.08    | ± 0.16 |
| ACADL_RAT           | C*IGAIAMTEPGAGSDLQGVR <sup>b</sup>   | 1.13                                     | 1.02        | 1.04        | 1.06    | ± 0.06 |
| ADT1_RAT            | GADIMYTGTVDC*WR <sup>a</sup>         | 0.93                                     | 0.93        | 1.11        | 0.99    | ± 0.10 |
|                     | GADIMYTGTVDC*WR <sup>b</sup>         | 1.05                                     | 1.11        | 1.01        | 1.06    | ± 0.05 |
|                     | LLLQVQH*ASK <sup>b</sup>             | 0.96                                     | 1.06        | 0.90        | 0.97    | ± 0.08 |
| <b>Average ± SD</b> |                                      | 1.04 ± 0.15                              | 1.04 ± 0.09 | 1.02 ± 0.09 | 1.03    | ± 0.07 |

<sup>1</sup> The site of oxylipid conjugation is marked with an asterisk (\*). The chemical nature of the oxylipid modification is indicated by the following superscripts: a, acrolein, b, HHE, c, ONE, d, HNE

**Figure S3-1**  
**4700 MS/MS Precursor 1820.81**

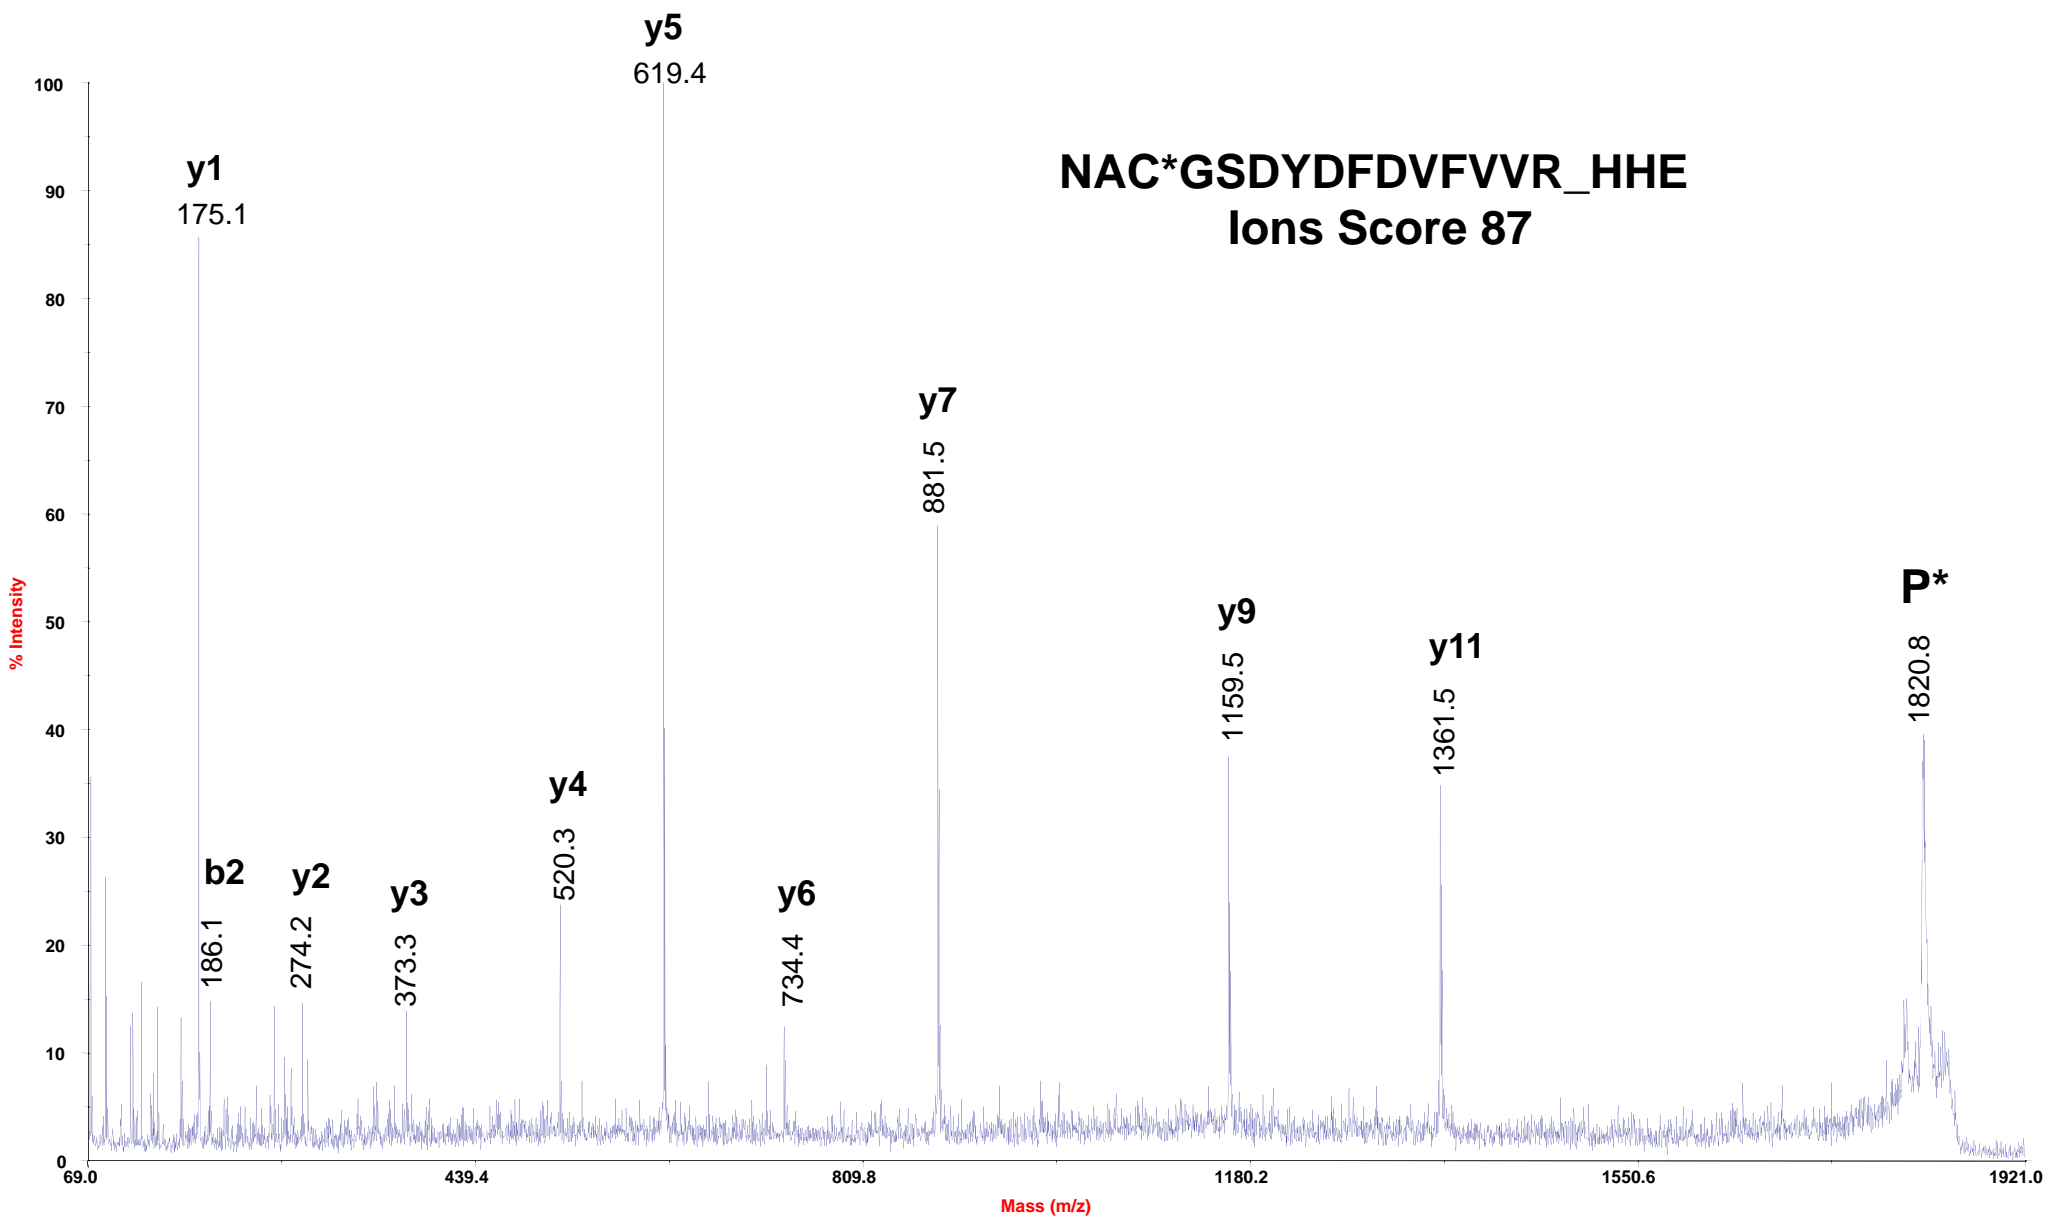

**Figure S3-2**  
**4700 MS/MS Precursor 1058.62**

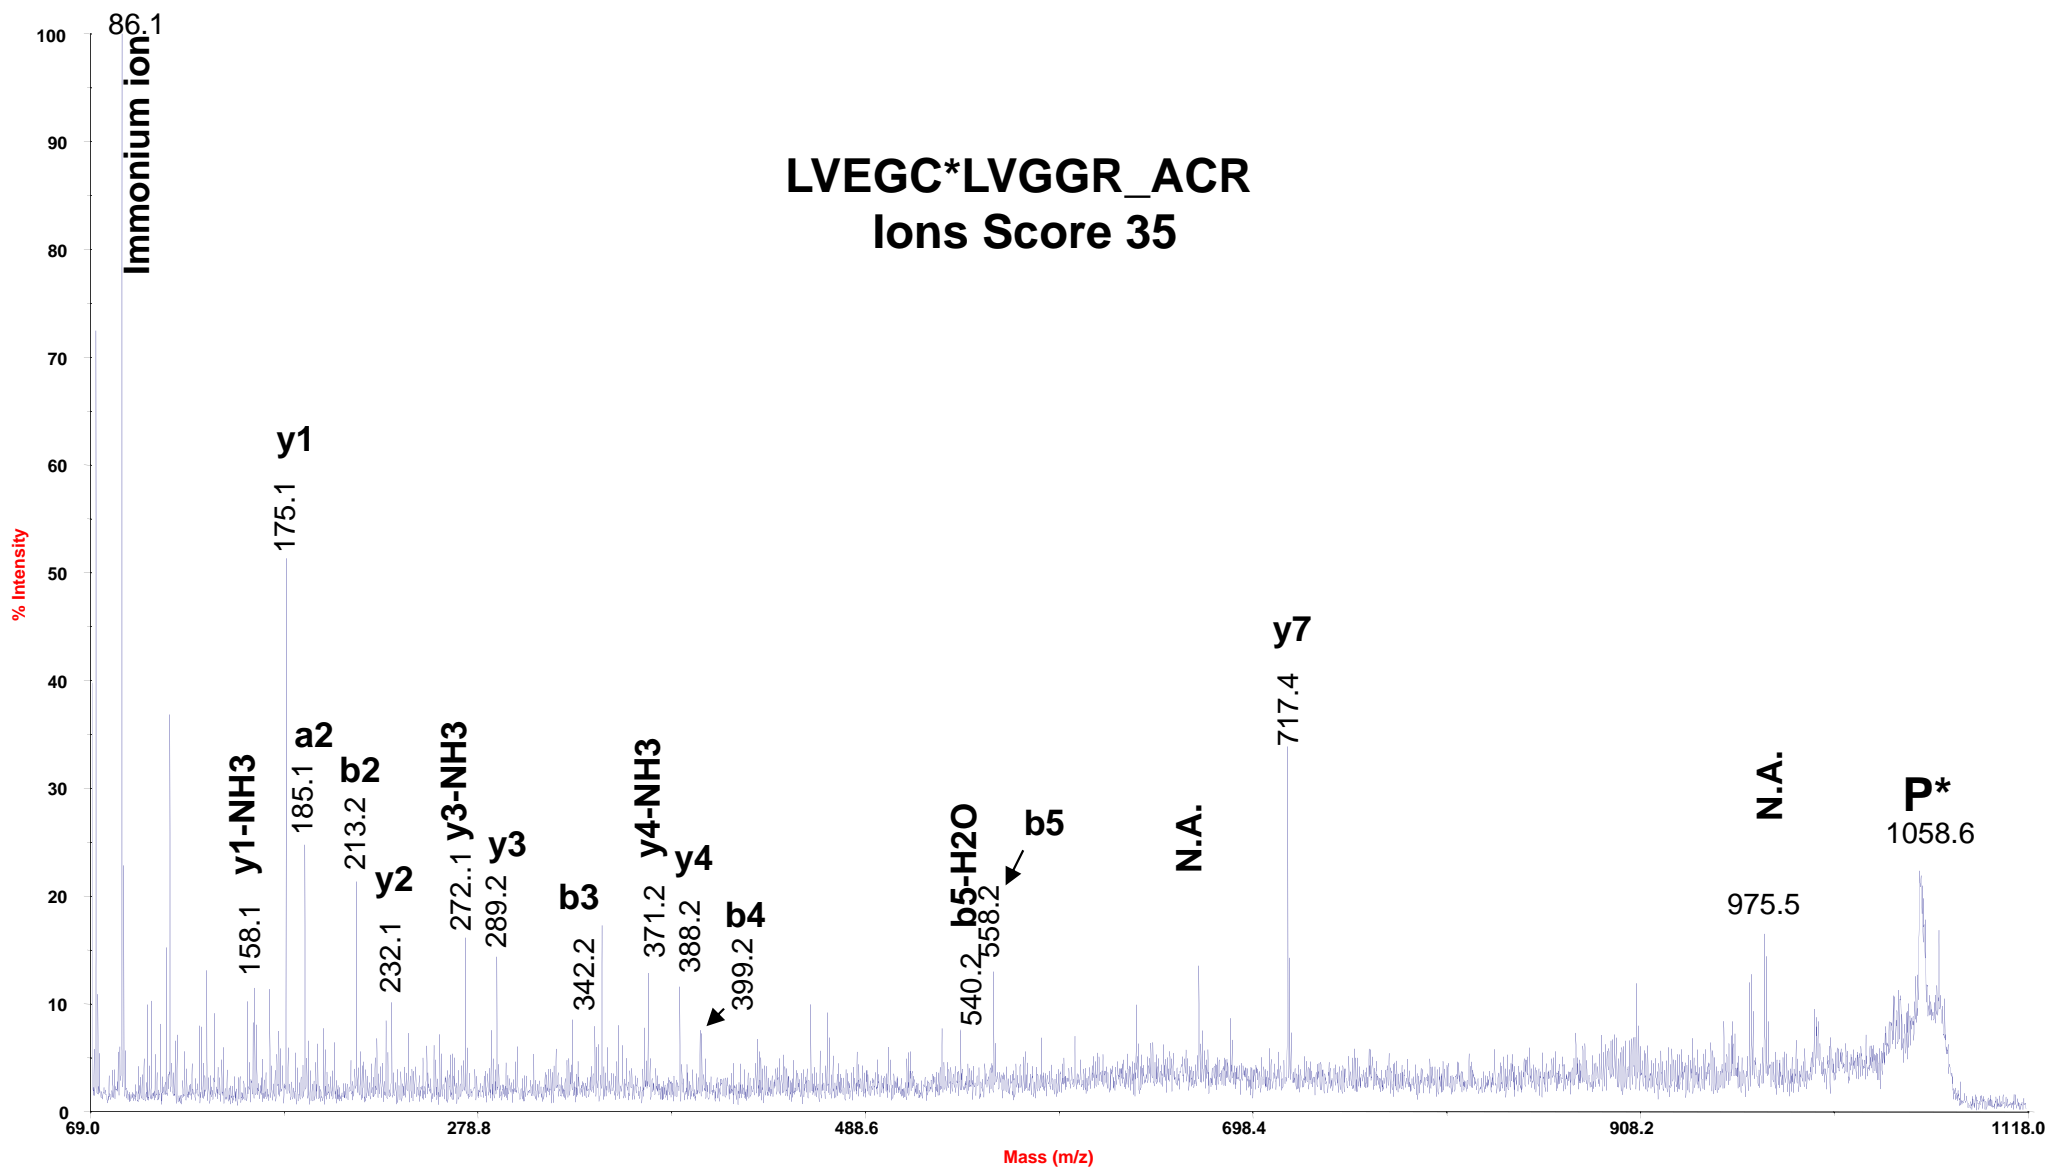

Figure S3-3  
4700 MS/MS Precursor 2636.37

LFNISGHVNHPC\*TVEEEMSVPLK\_ACR  
Ions Score 19

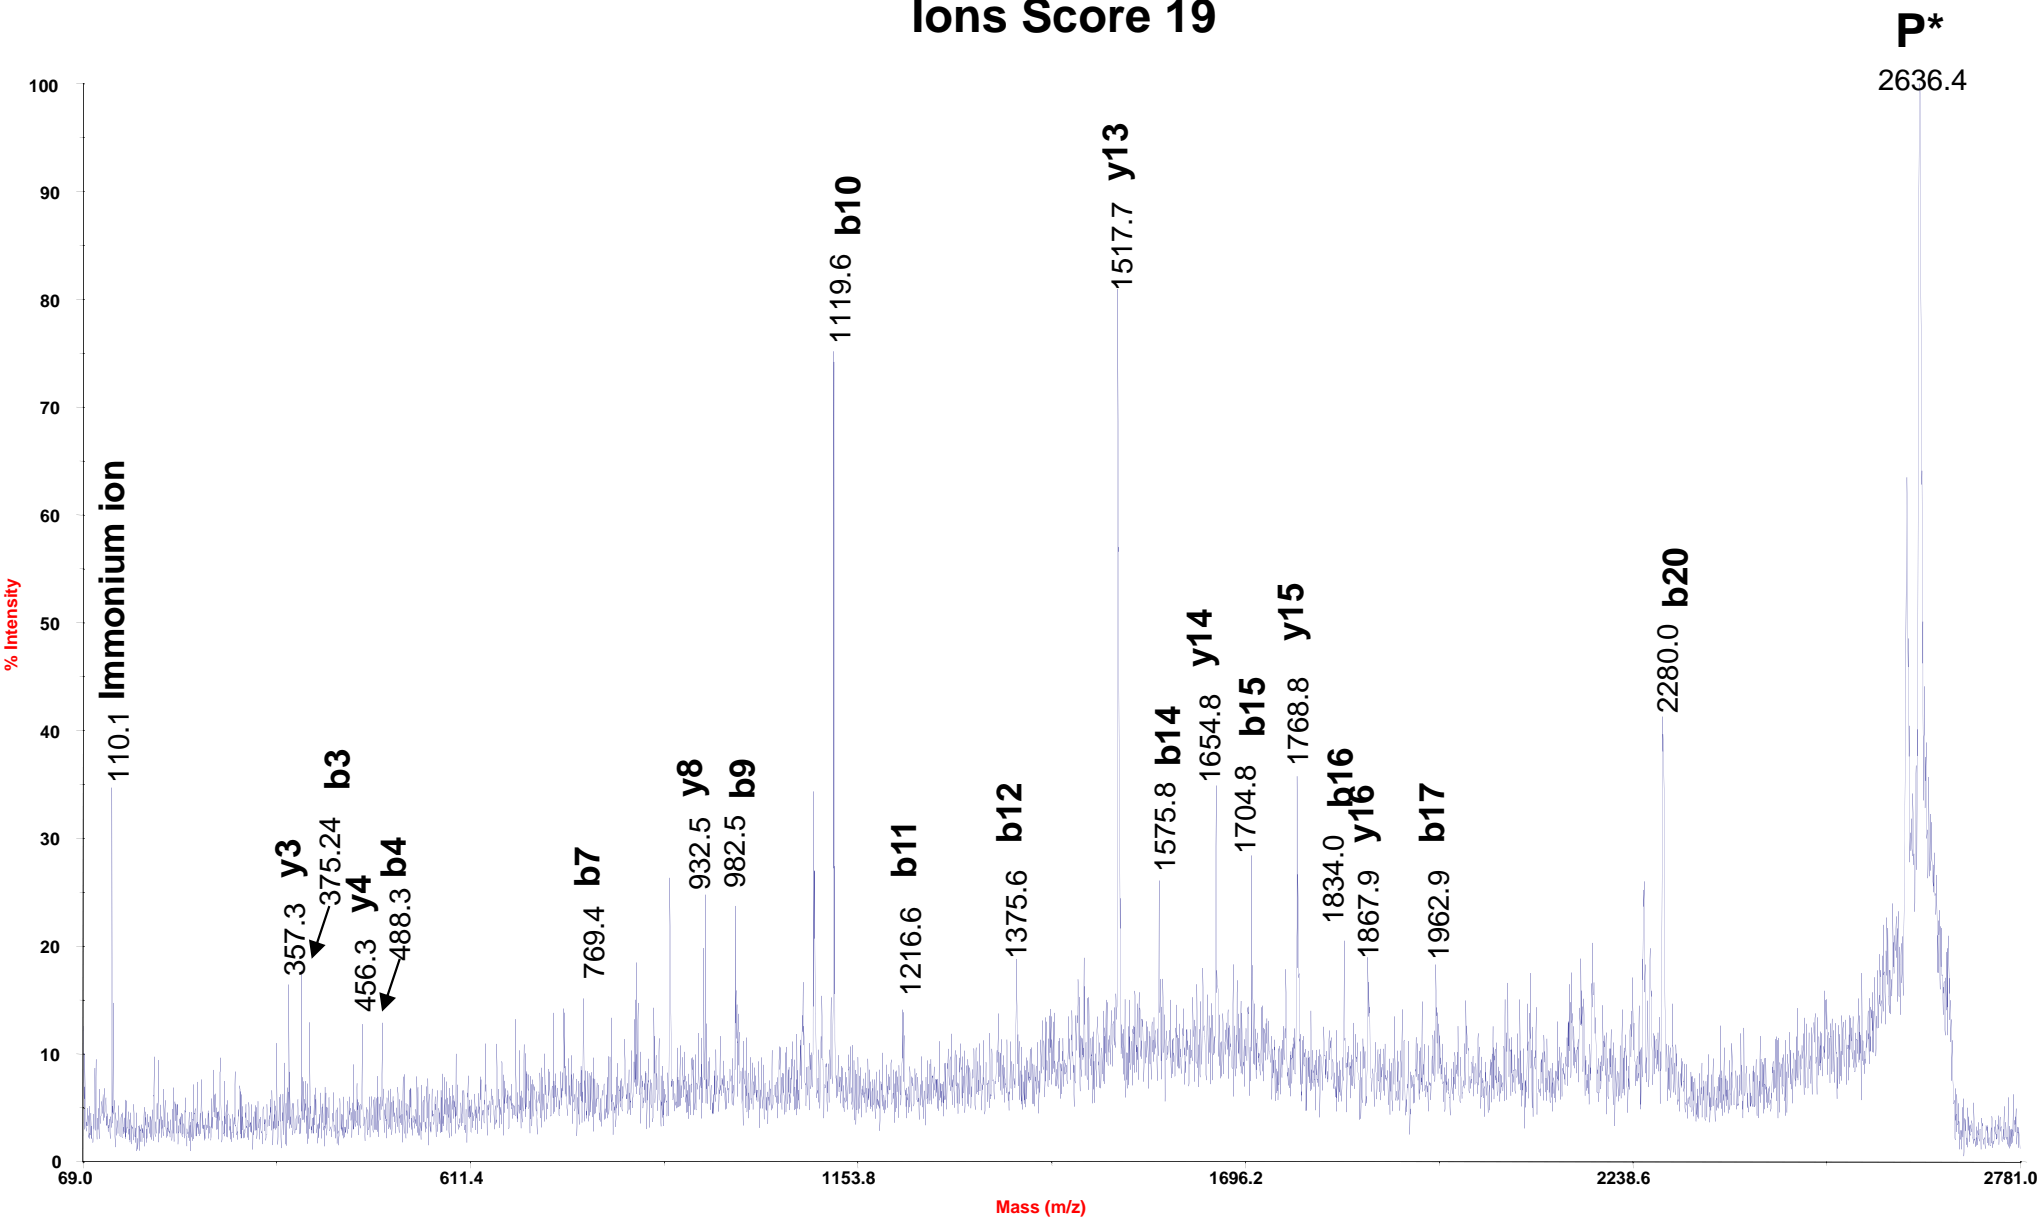

**Figure S3-4**  
**4700 MS/MS Precursor 2438.24**

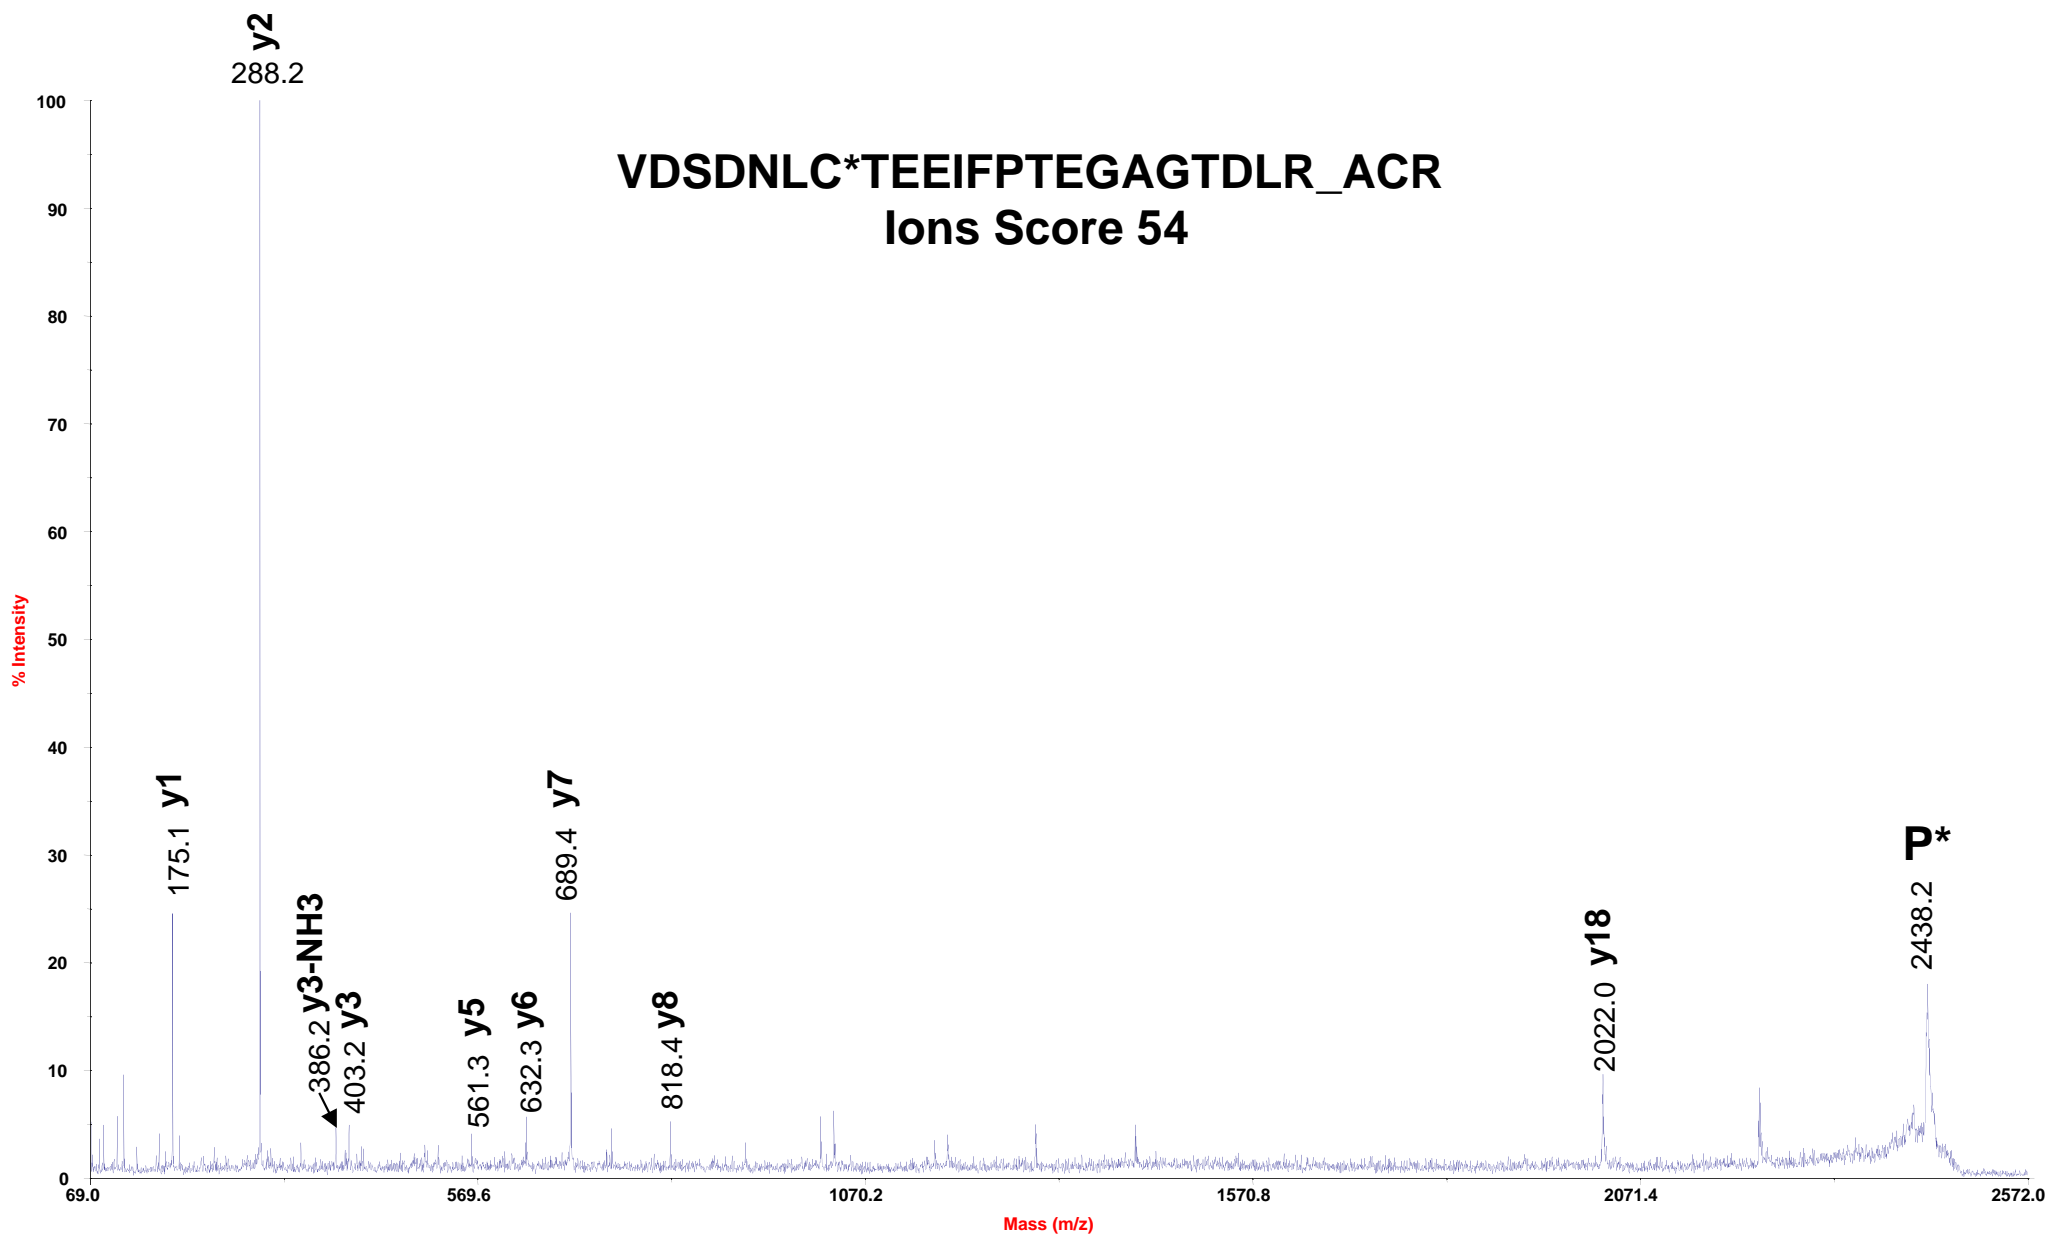

**Figure S3-5**  
**4700 MS/MS Precursor 1821.94**

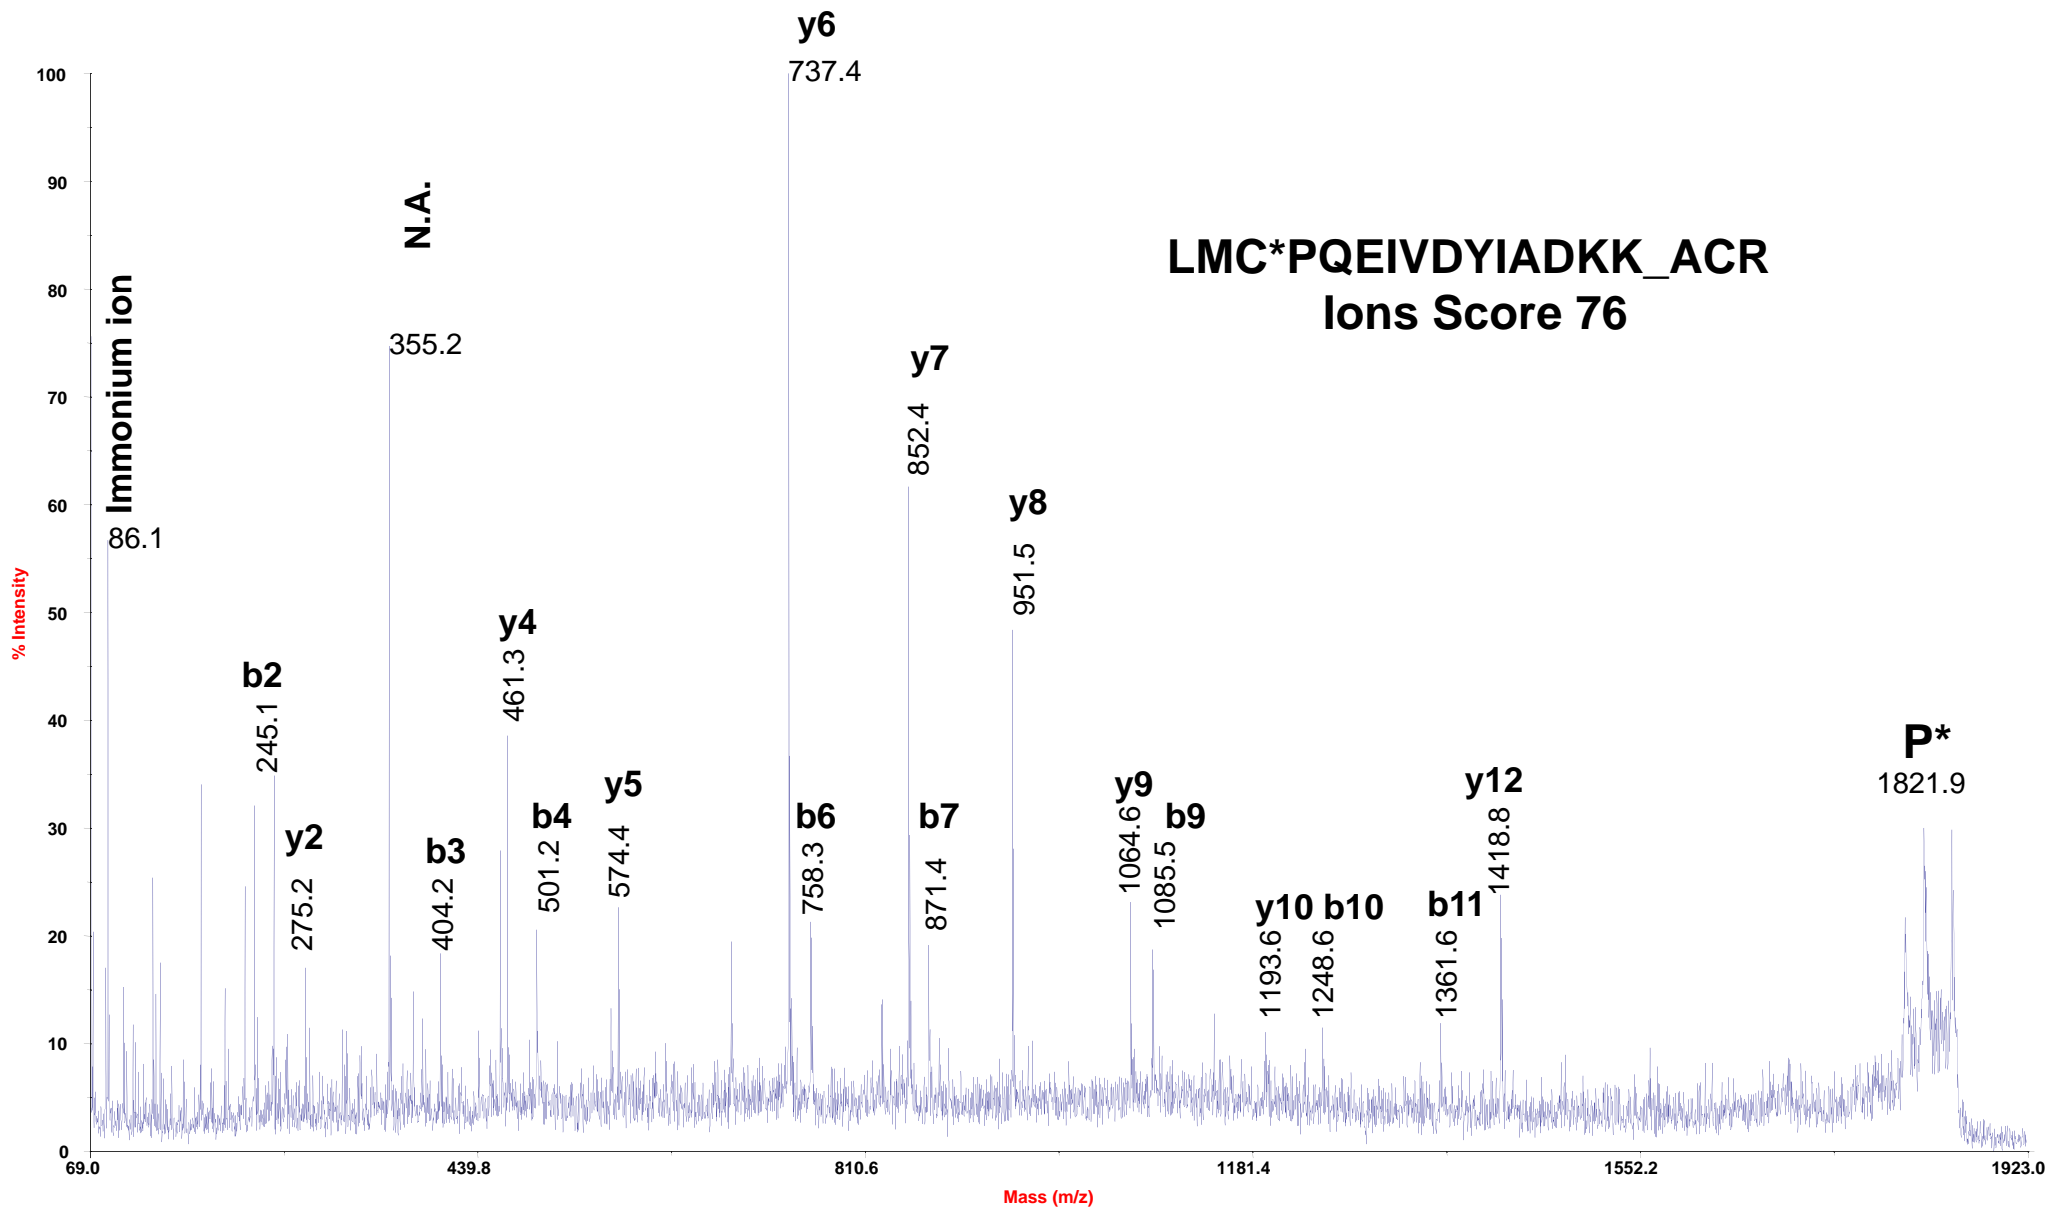



**Figure S3-6**  
**4700 MS/MS Precursor 1670.78**

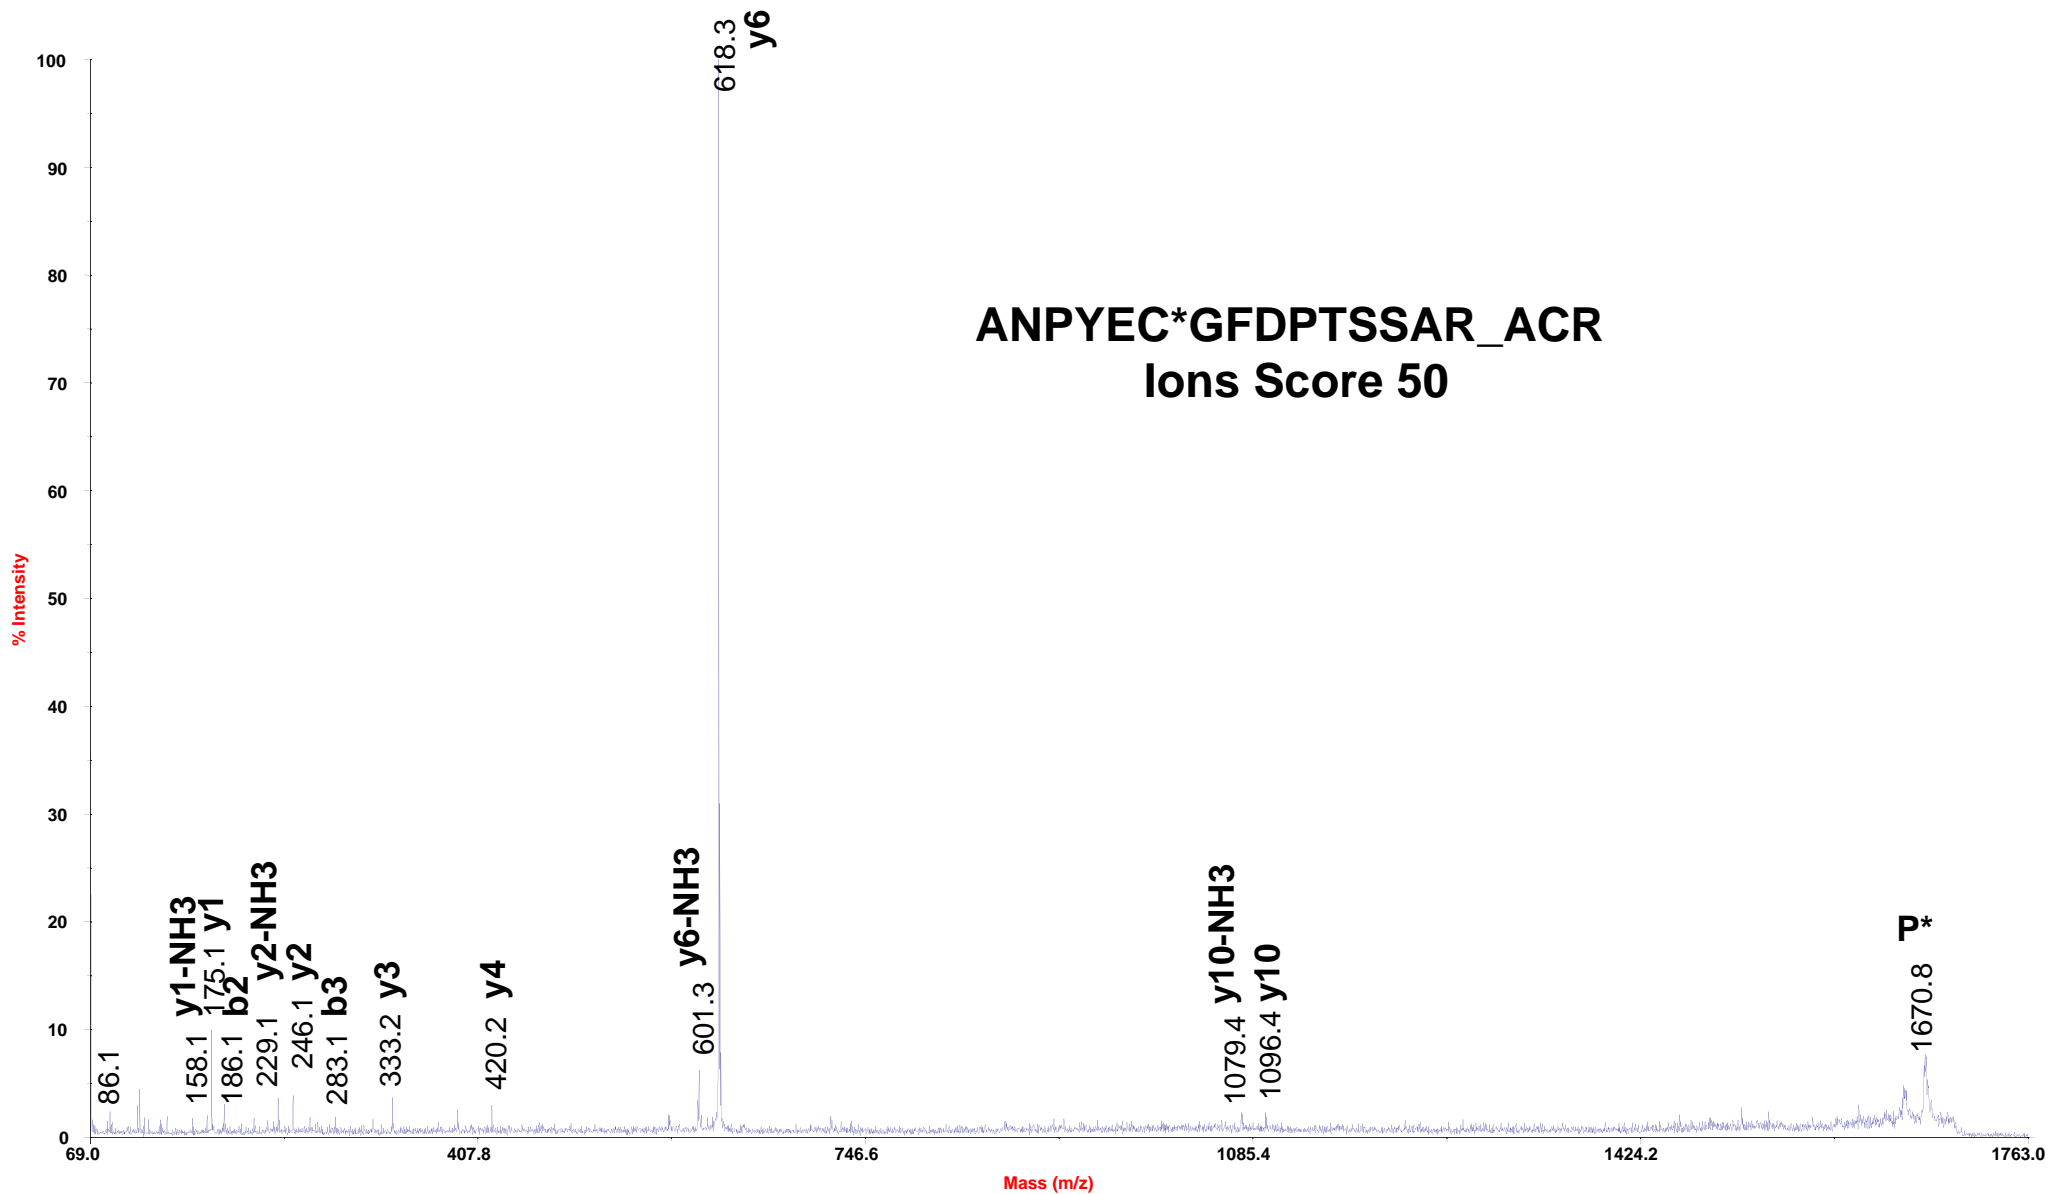

Figure S3-7  
4700 MS/MS Precursor 1724.96

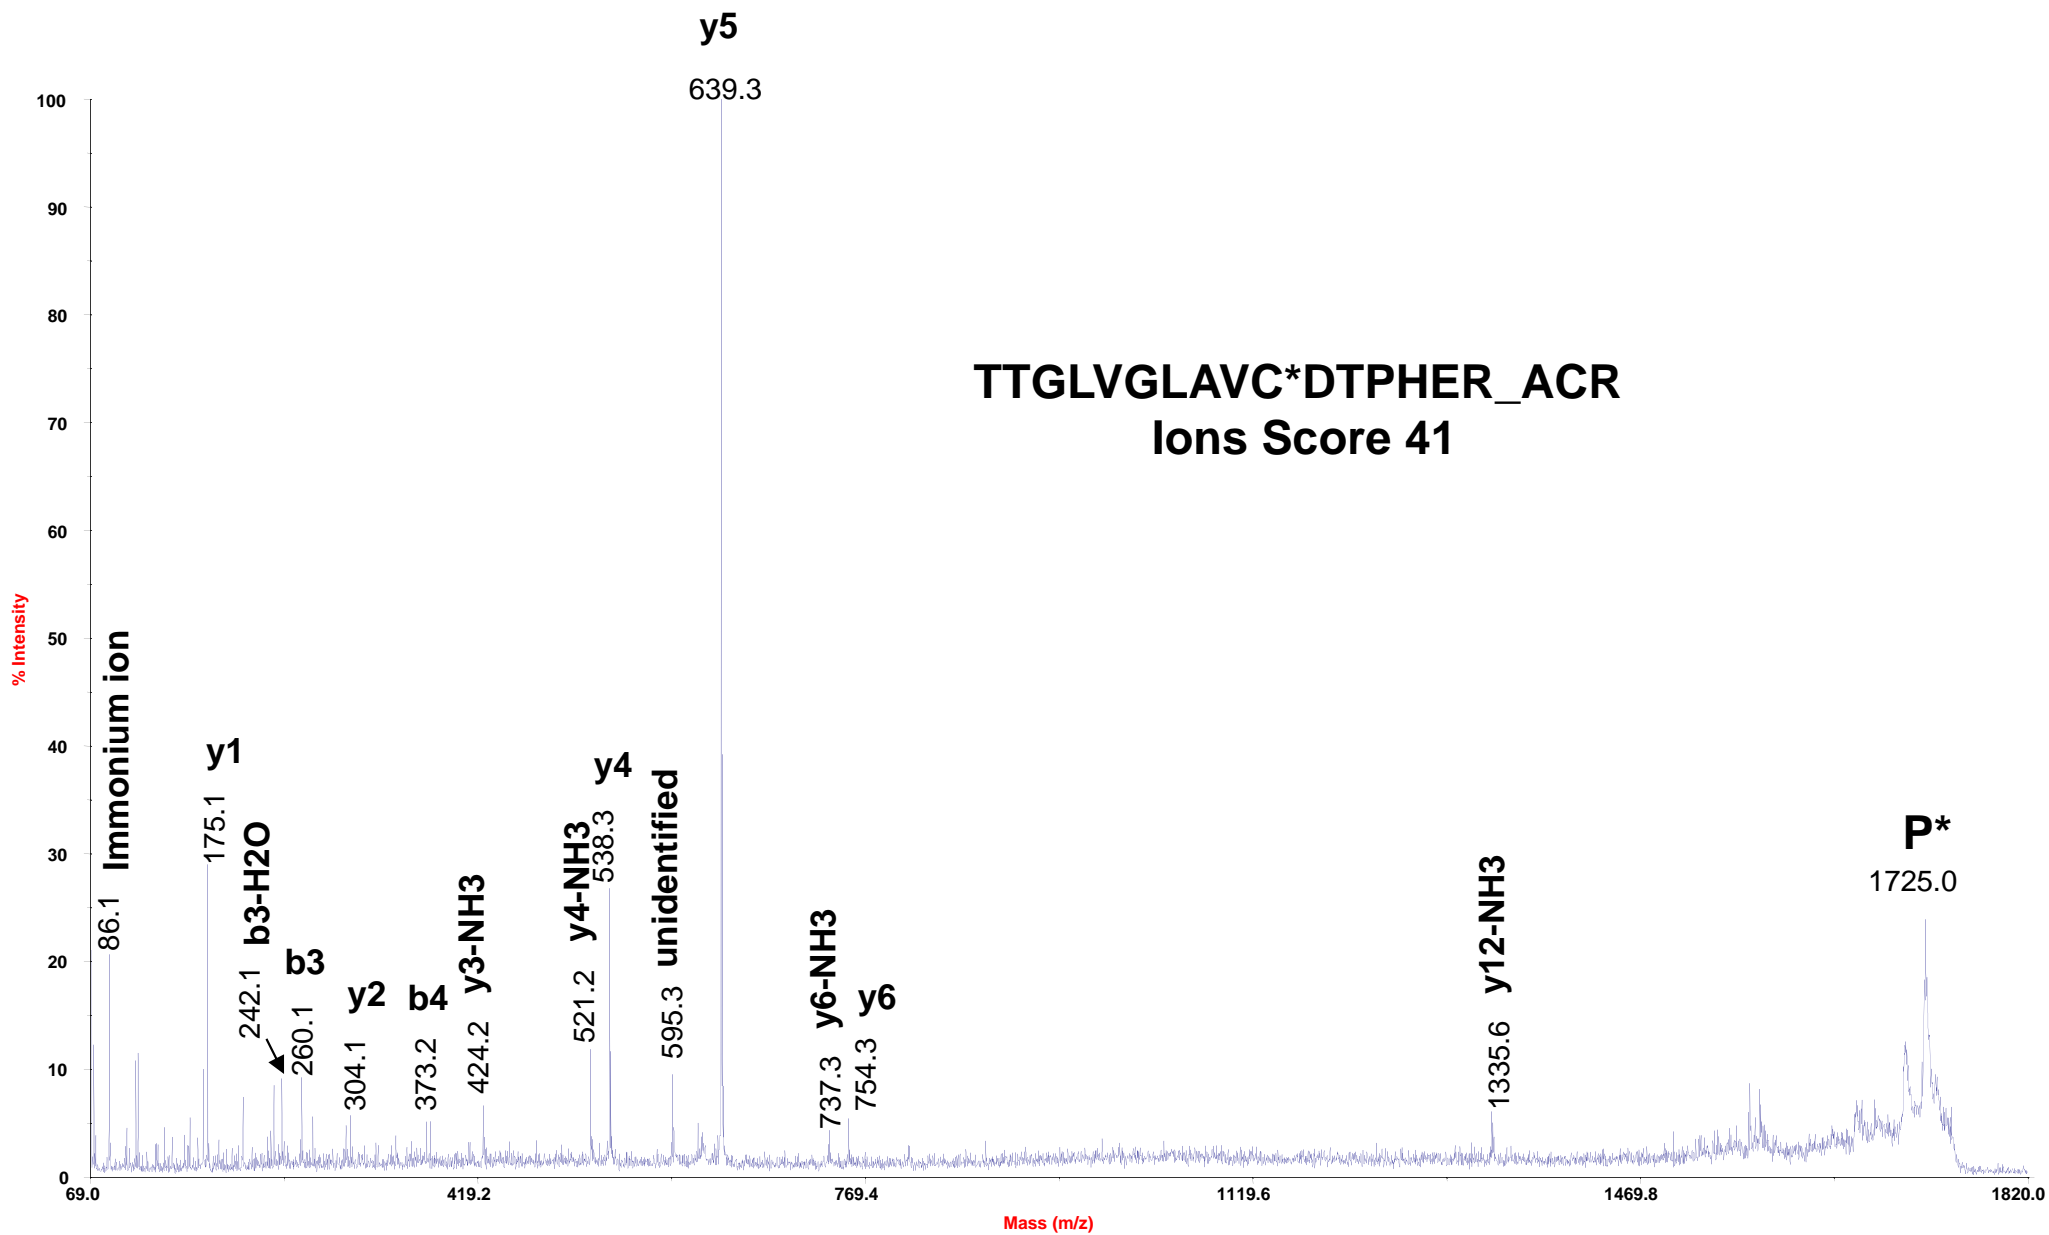

**Figure S3-8**  
**4700 MS/MS Precursor 1502.73 ]**

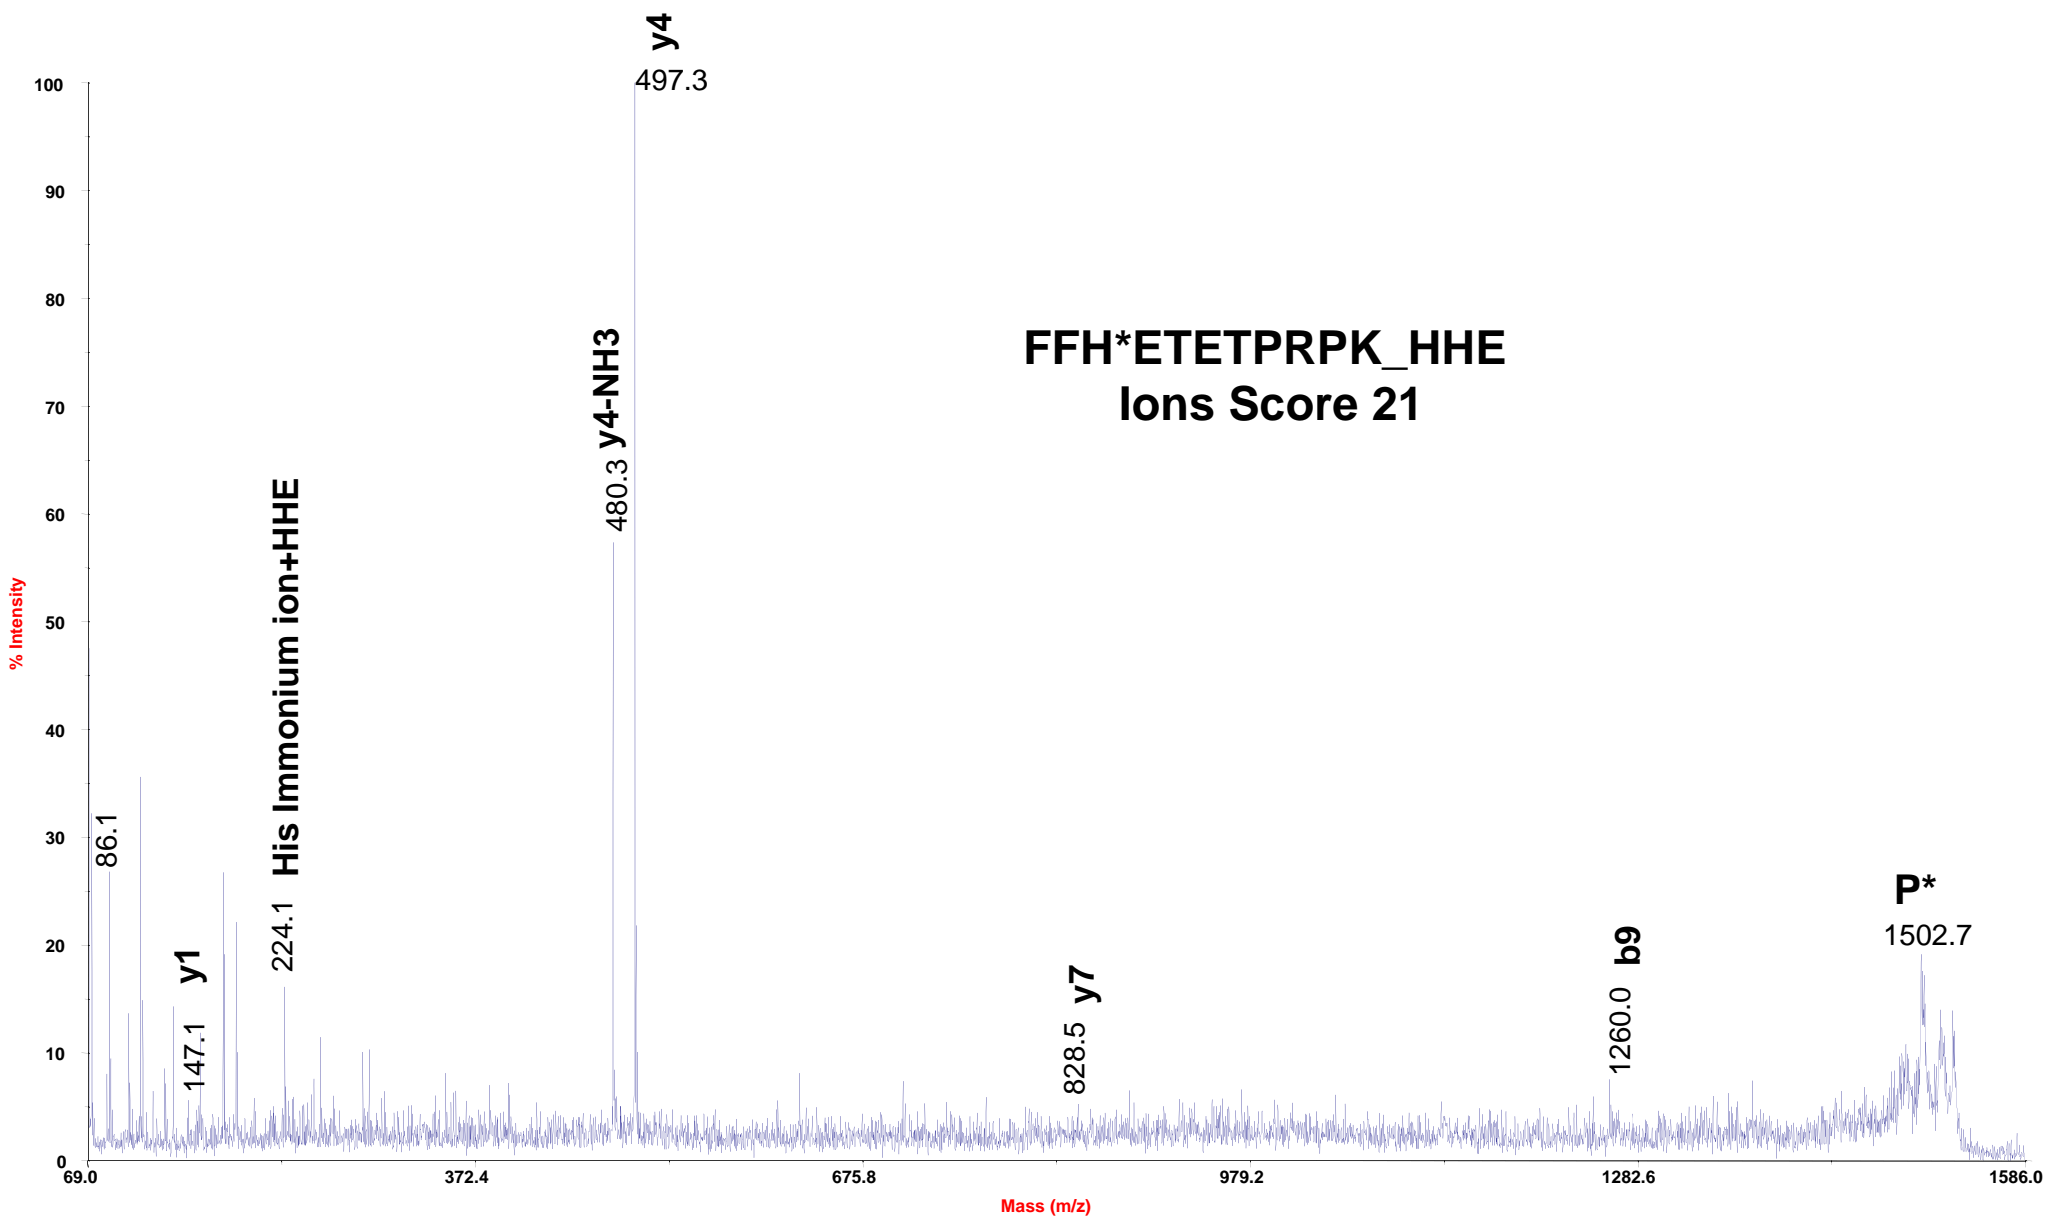

**Figure S3-9**  
**4700 MS/MS Precursor 1189.59**

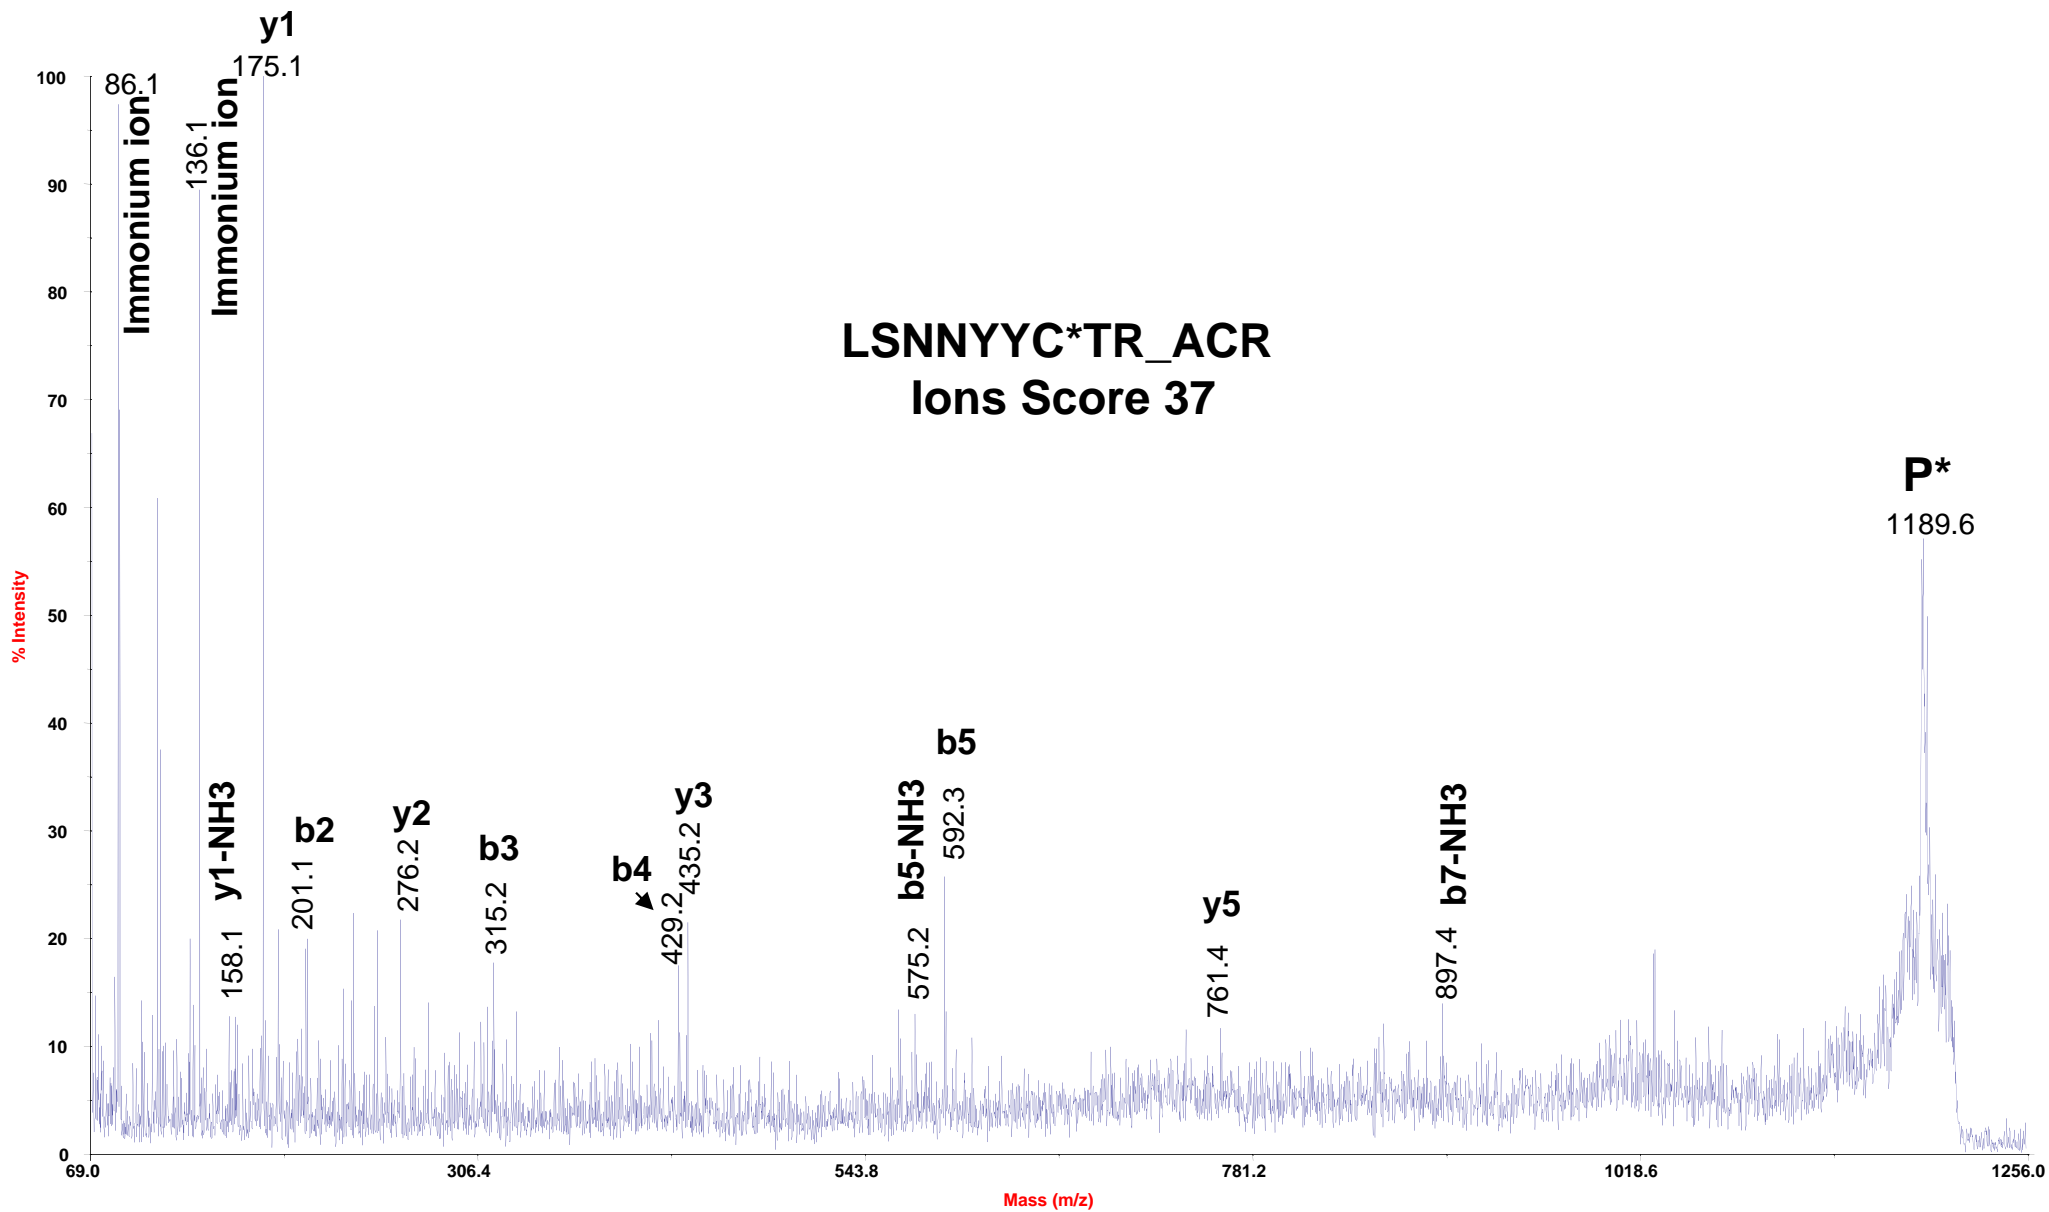

Figure S3-10  
4700 MS/MS Precursor 2249.95

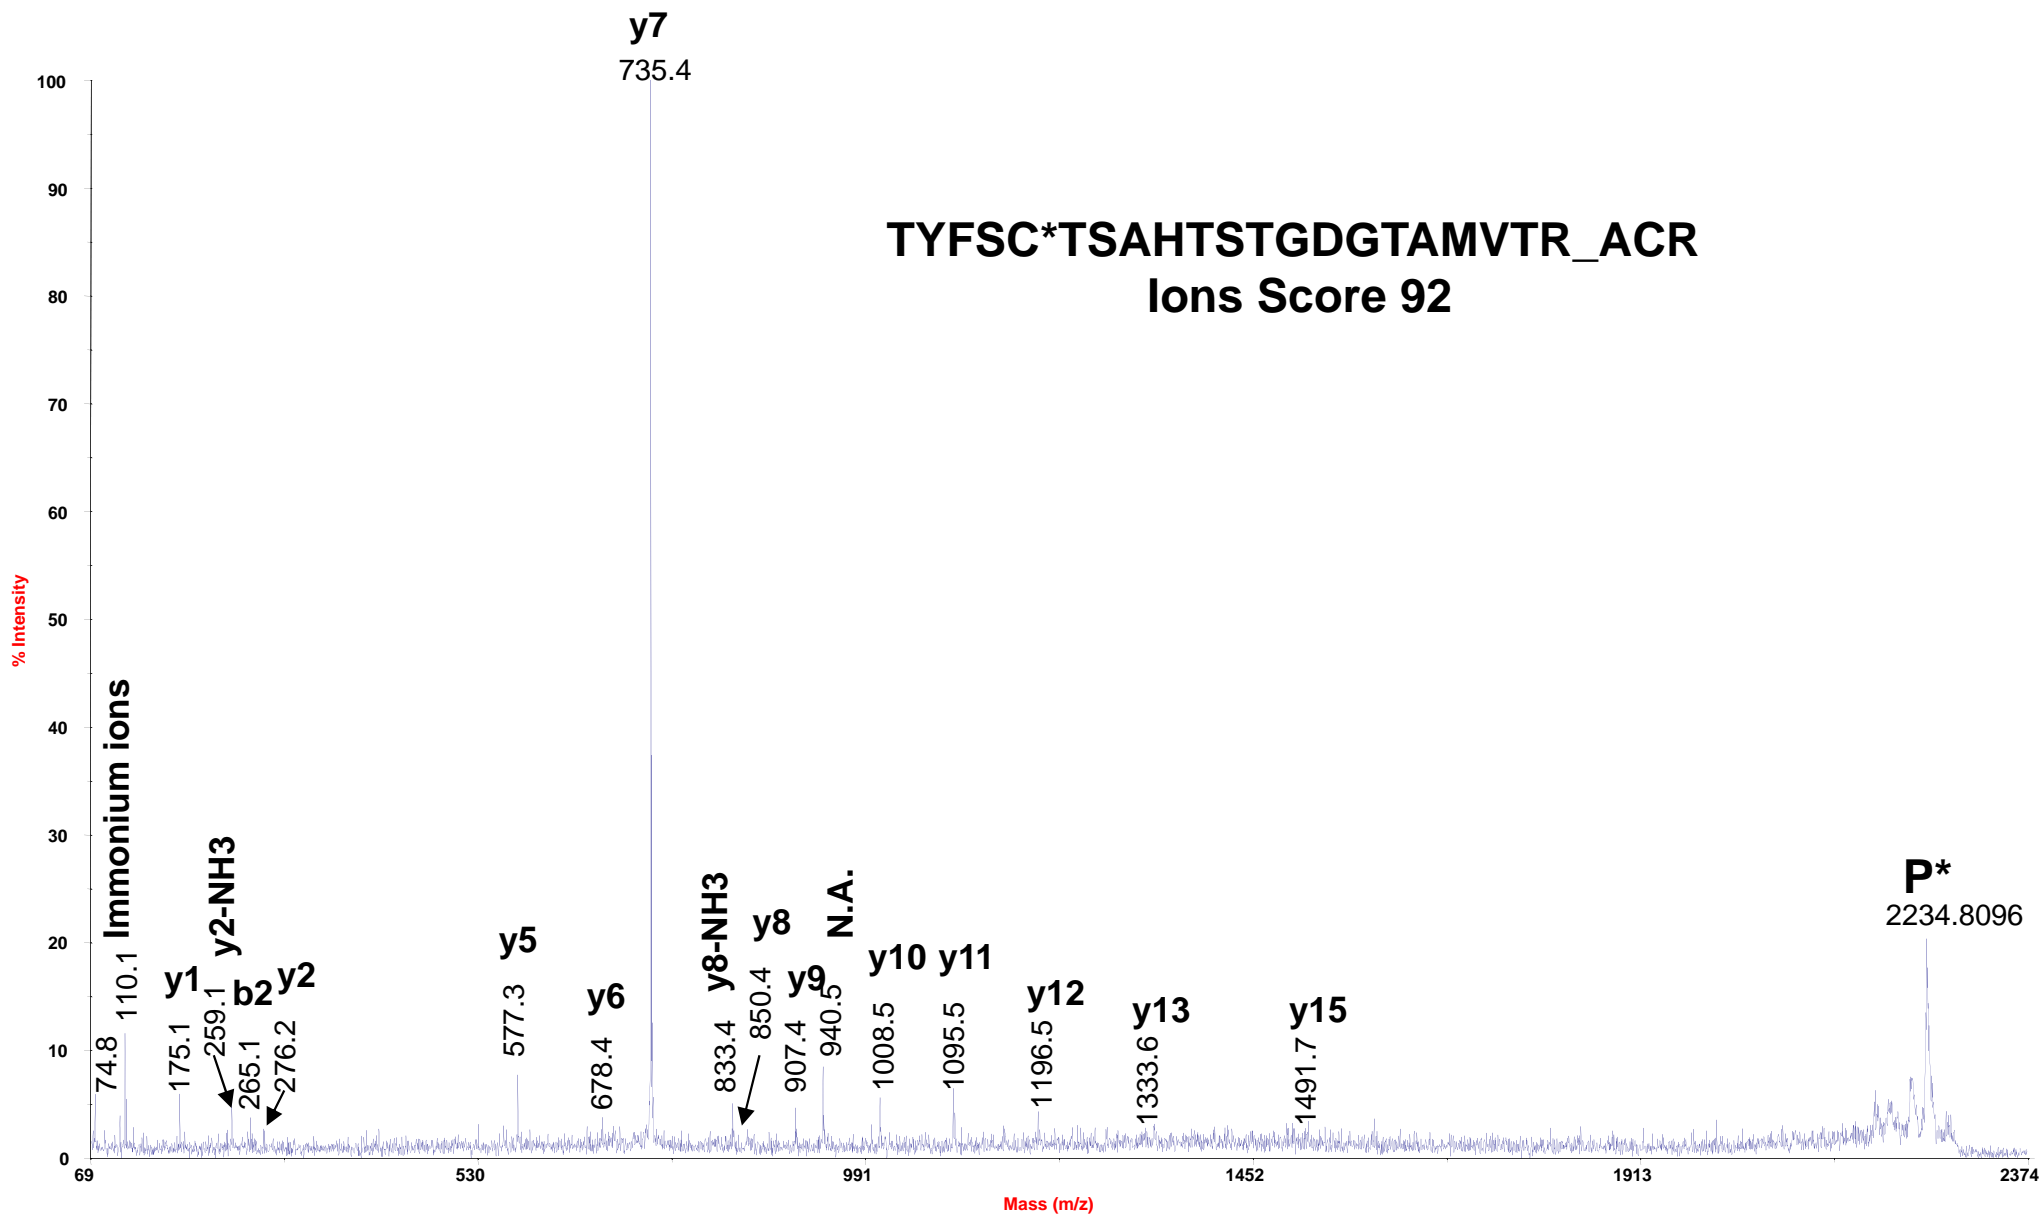

Figure S3-11  
4700 MS/MS Precursor 2350.12

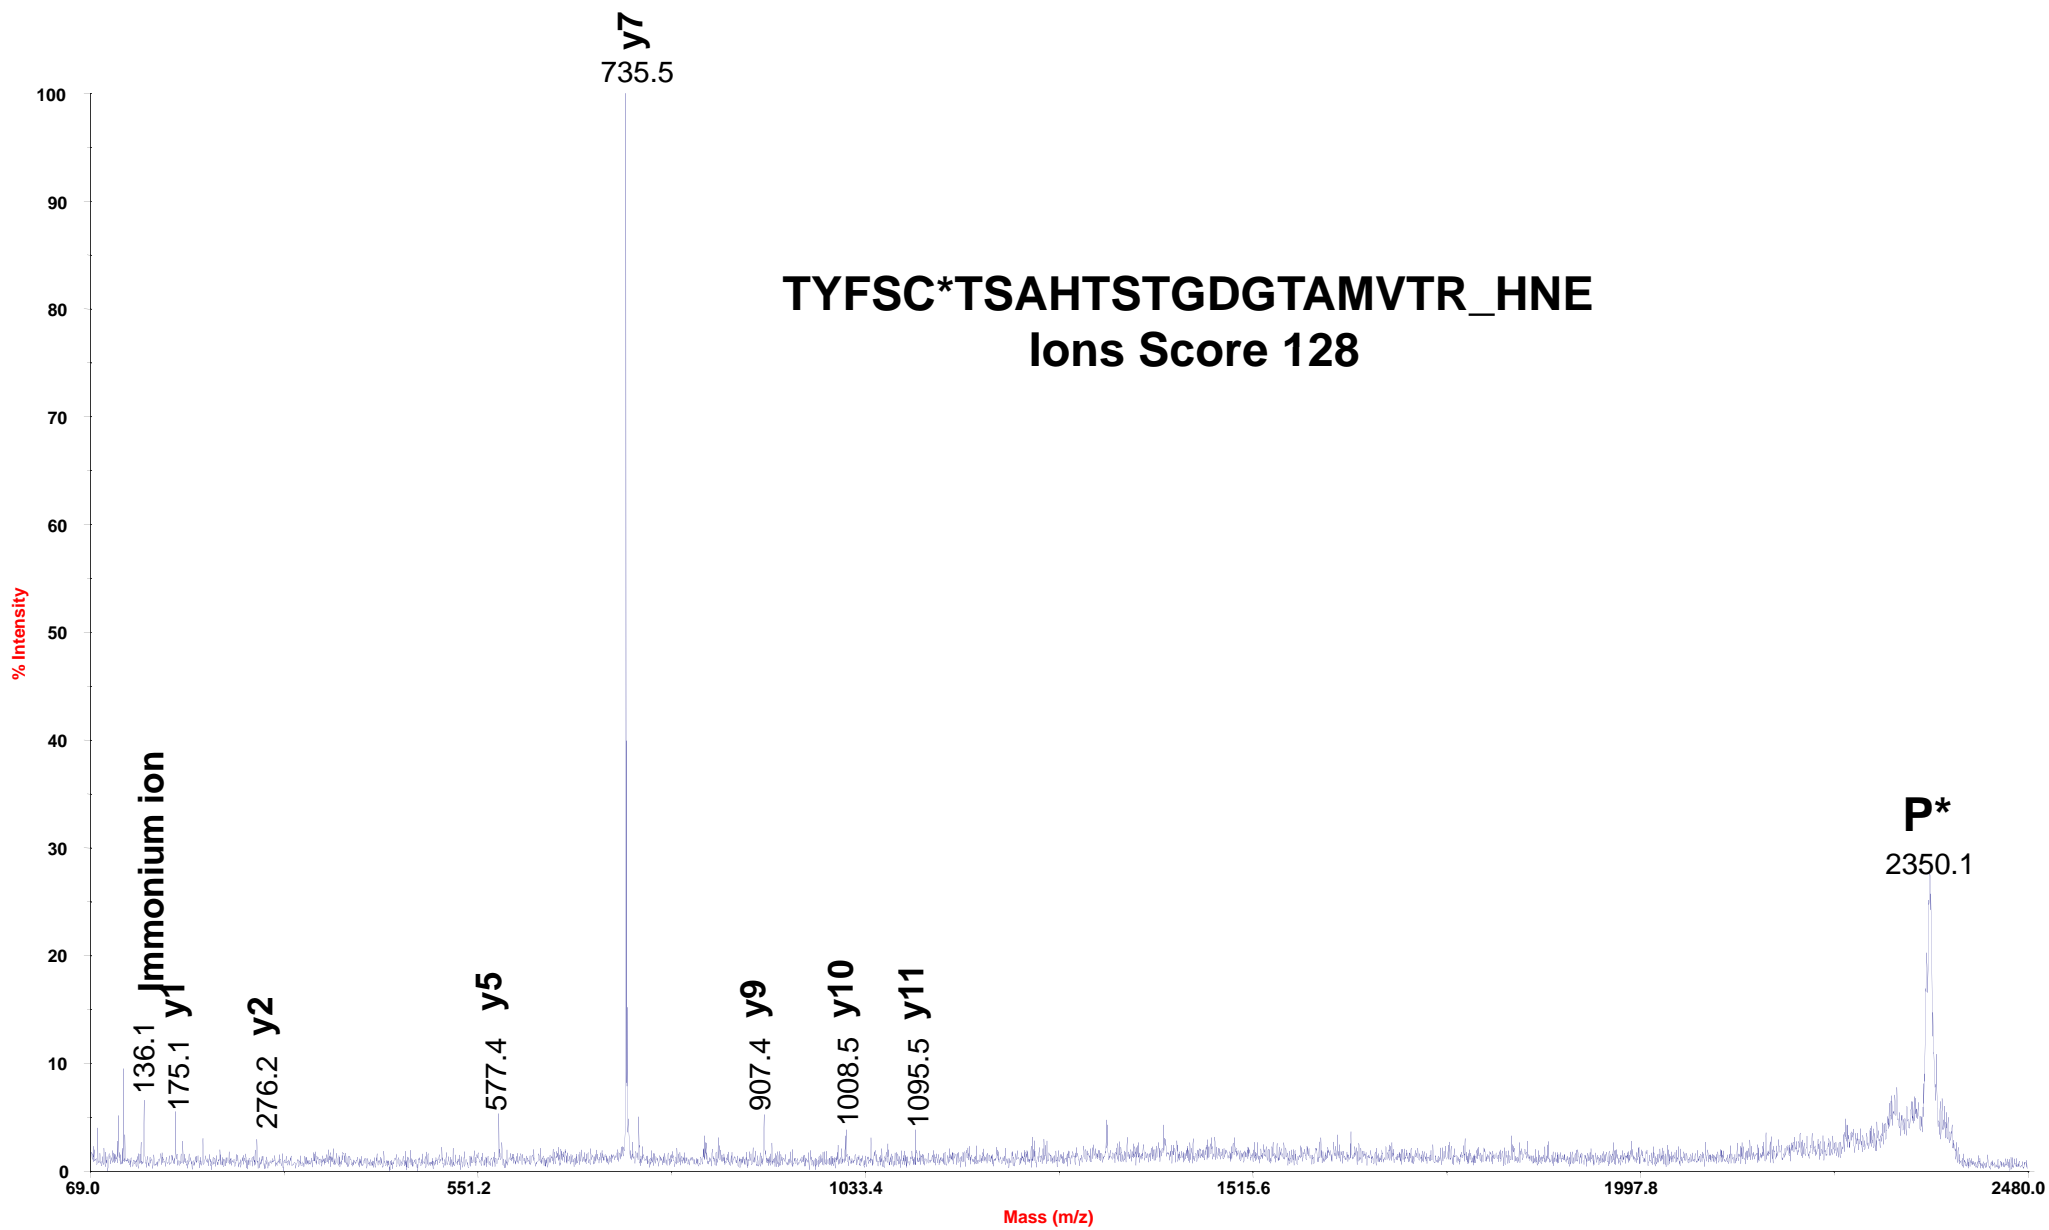

**Figure S3-12**  
**4700 MS/MS Precursor 1538.81**

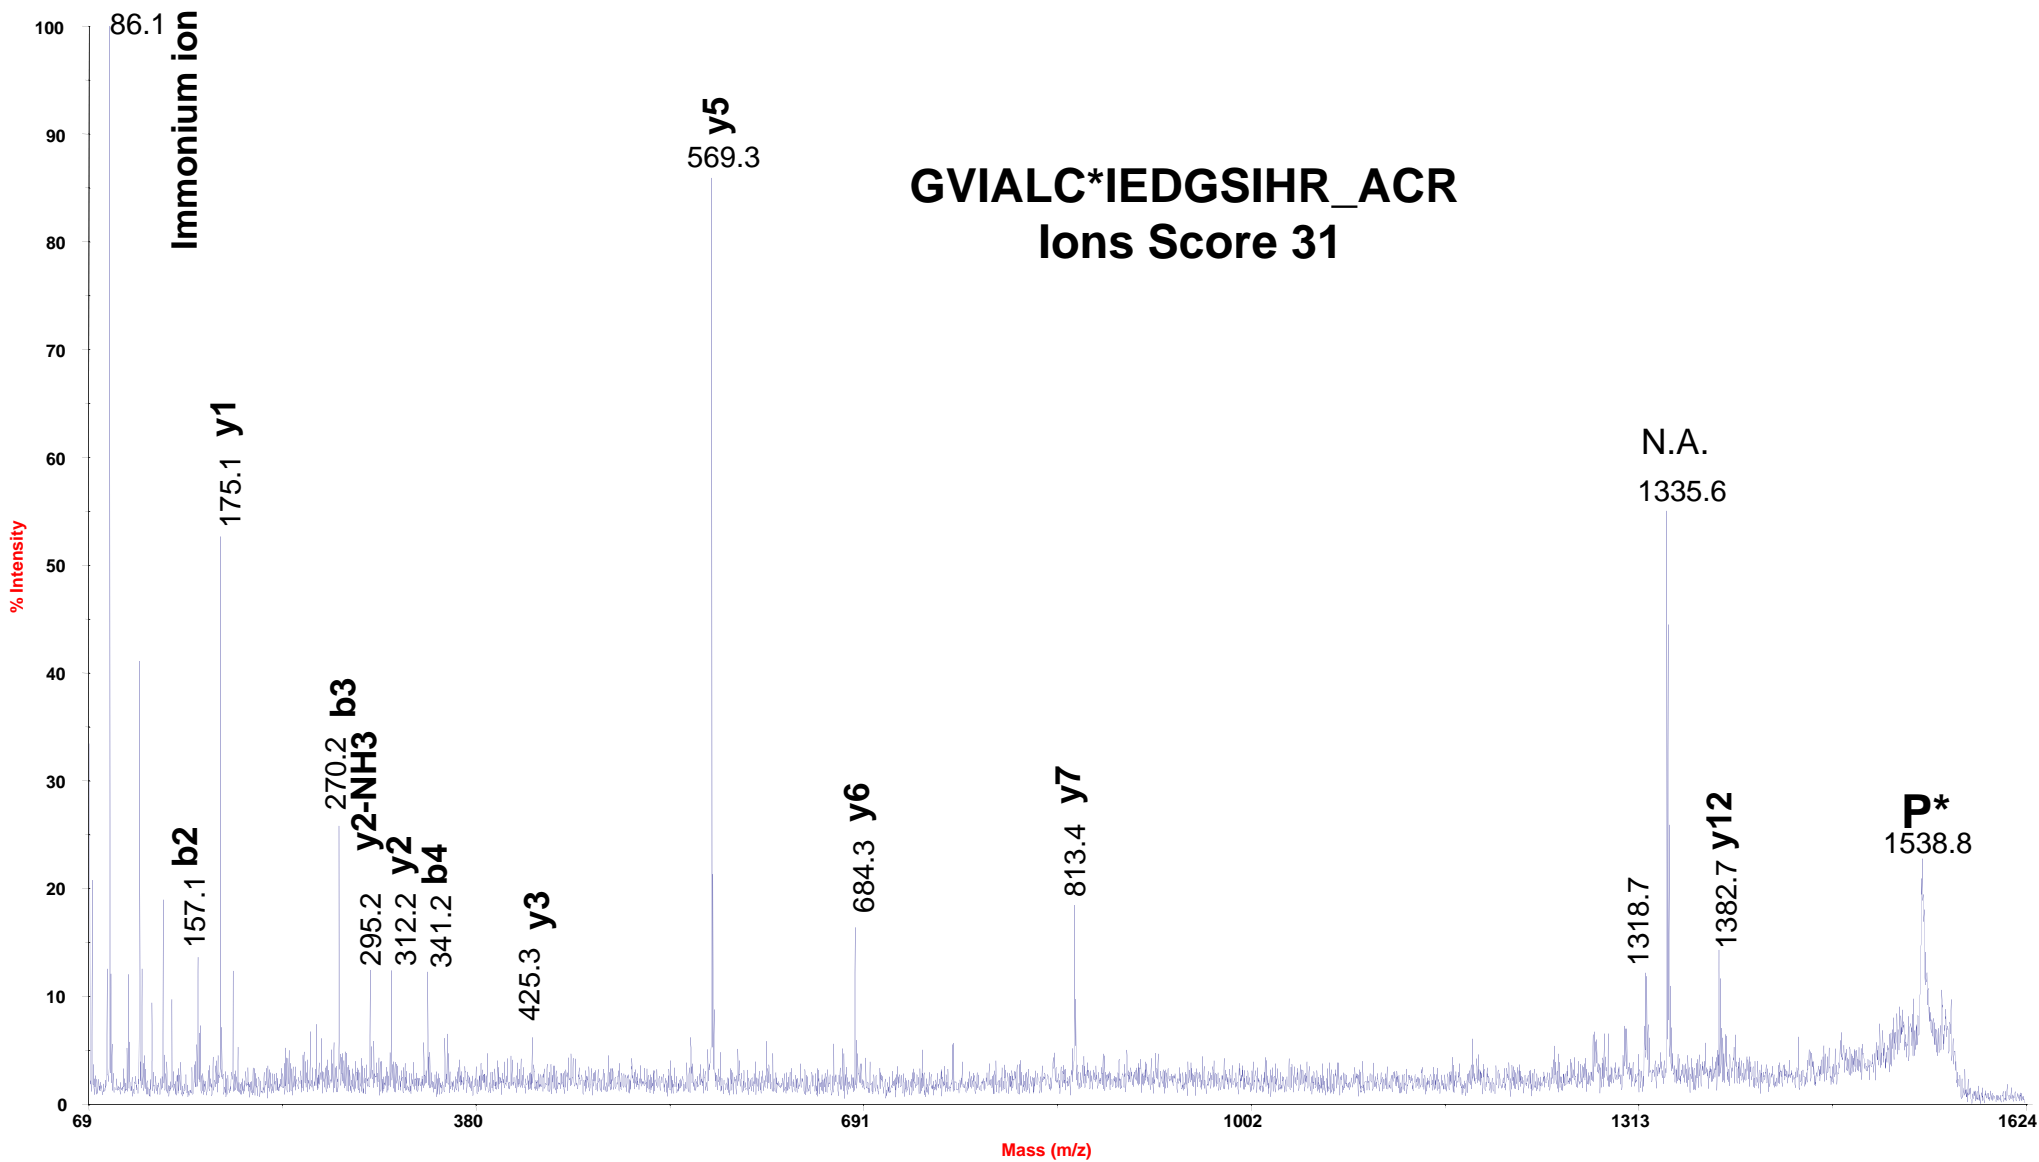

Figure S3-13  
4700 MS/MS Precursor 1626.88

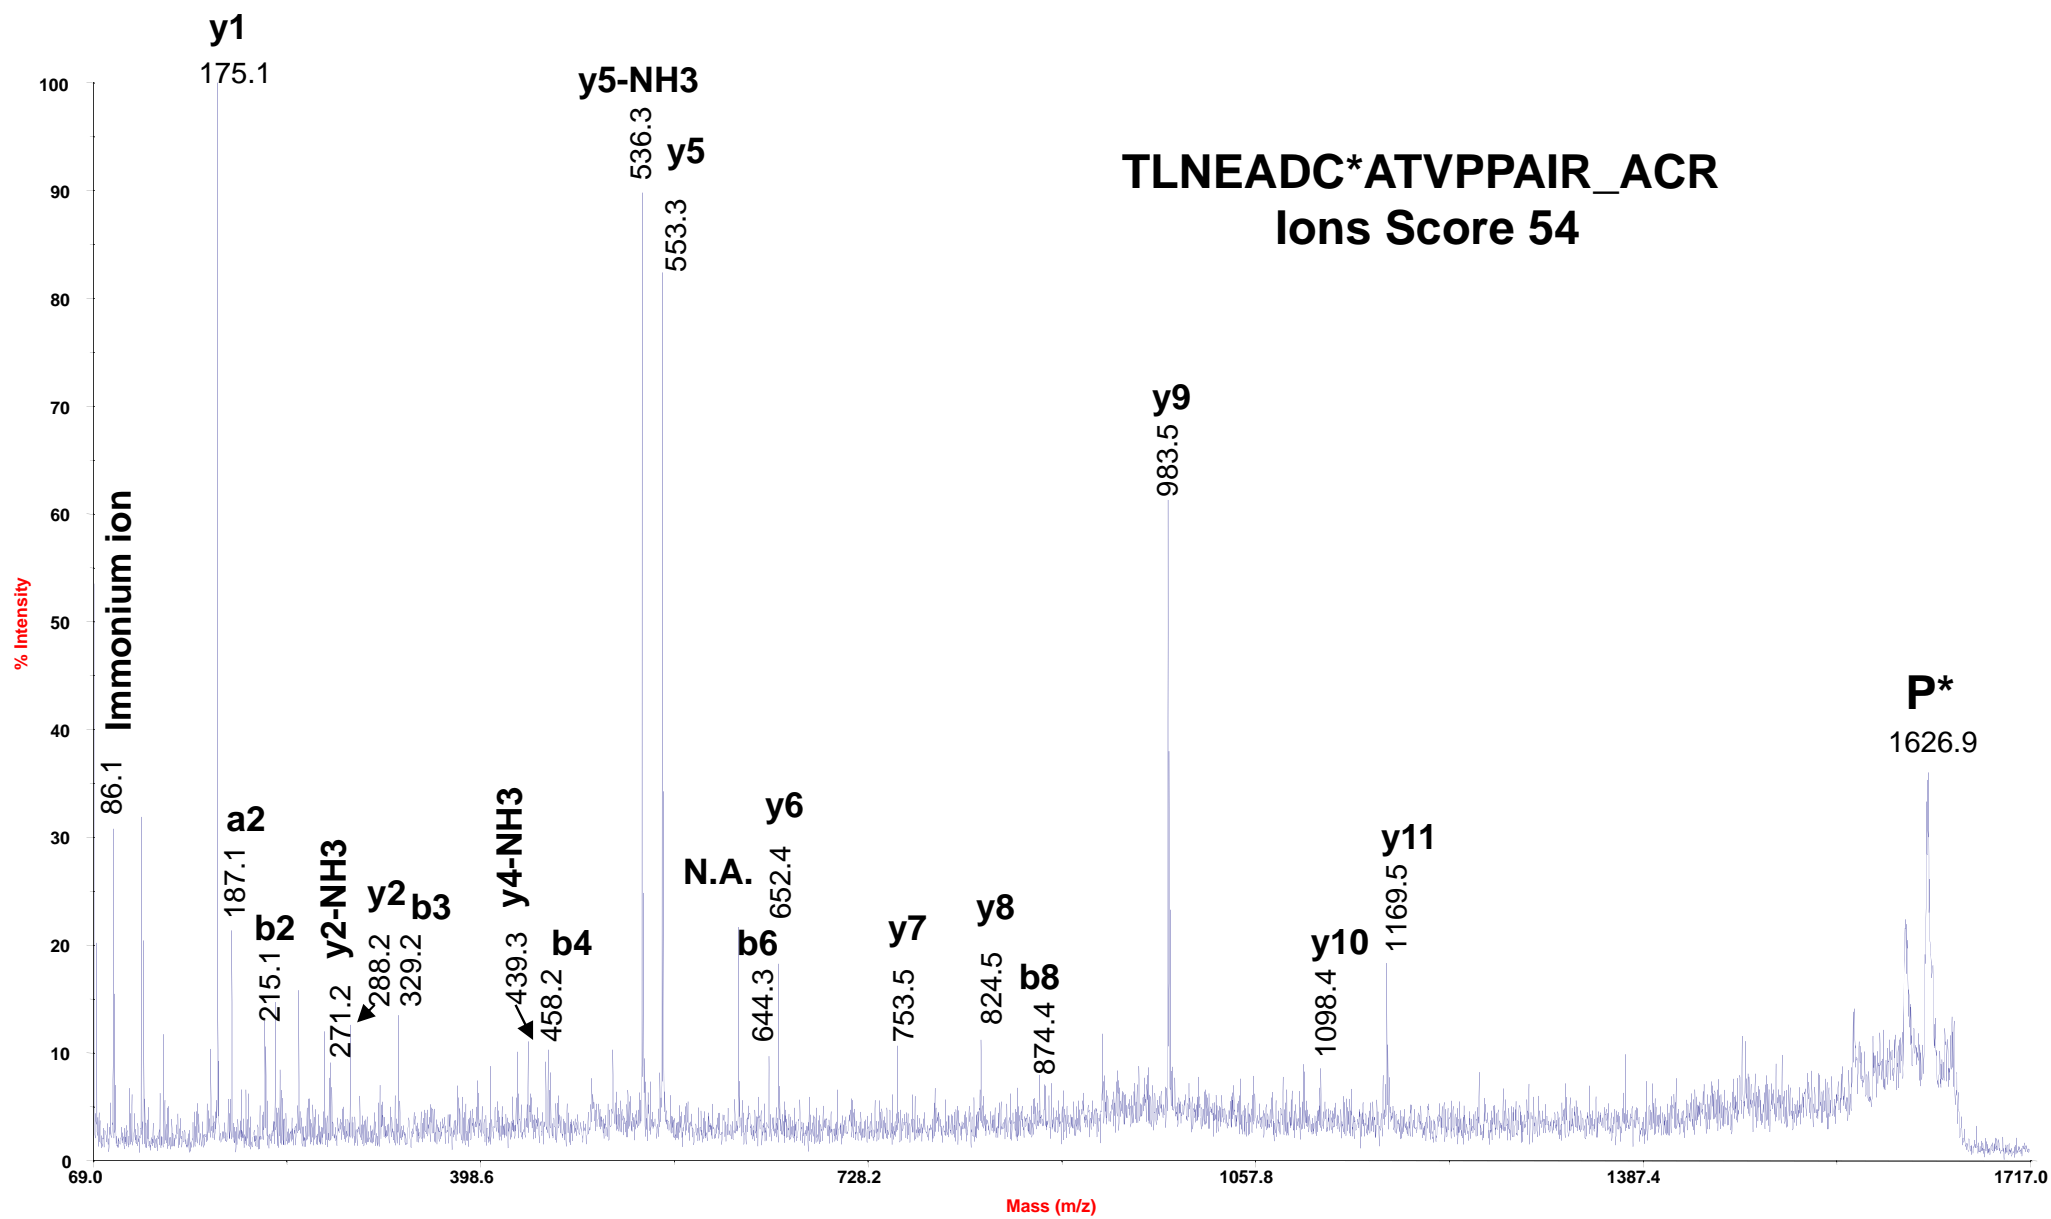



Figure S3-14  
4700 MS/MS Precursor 2167.2

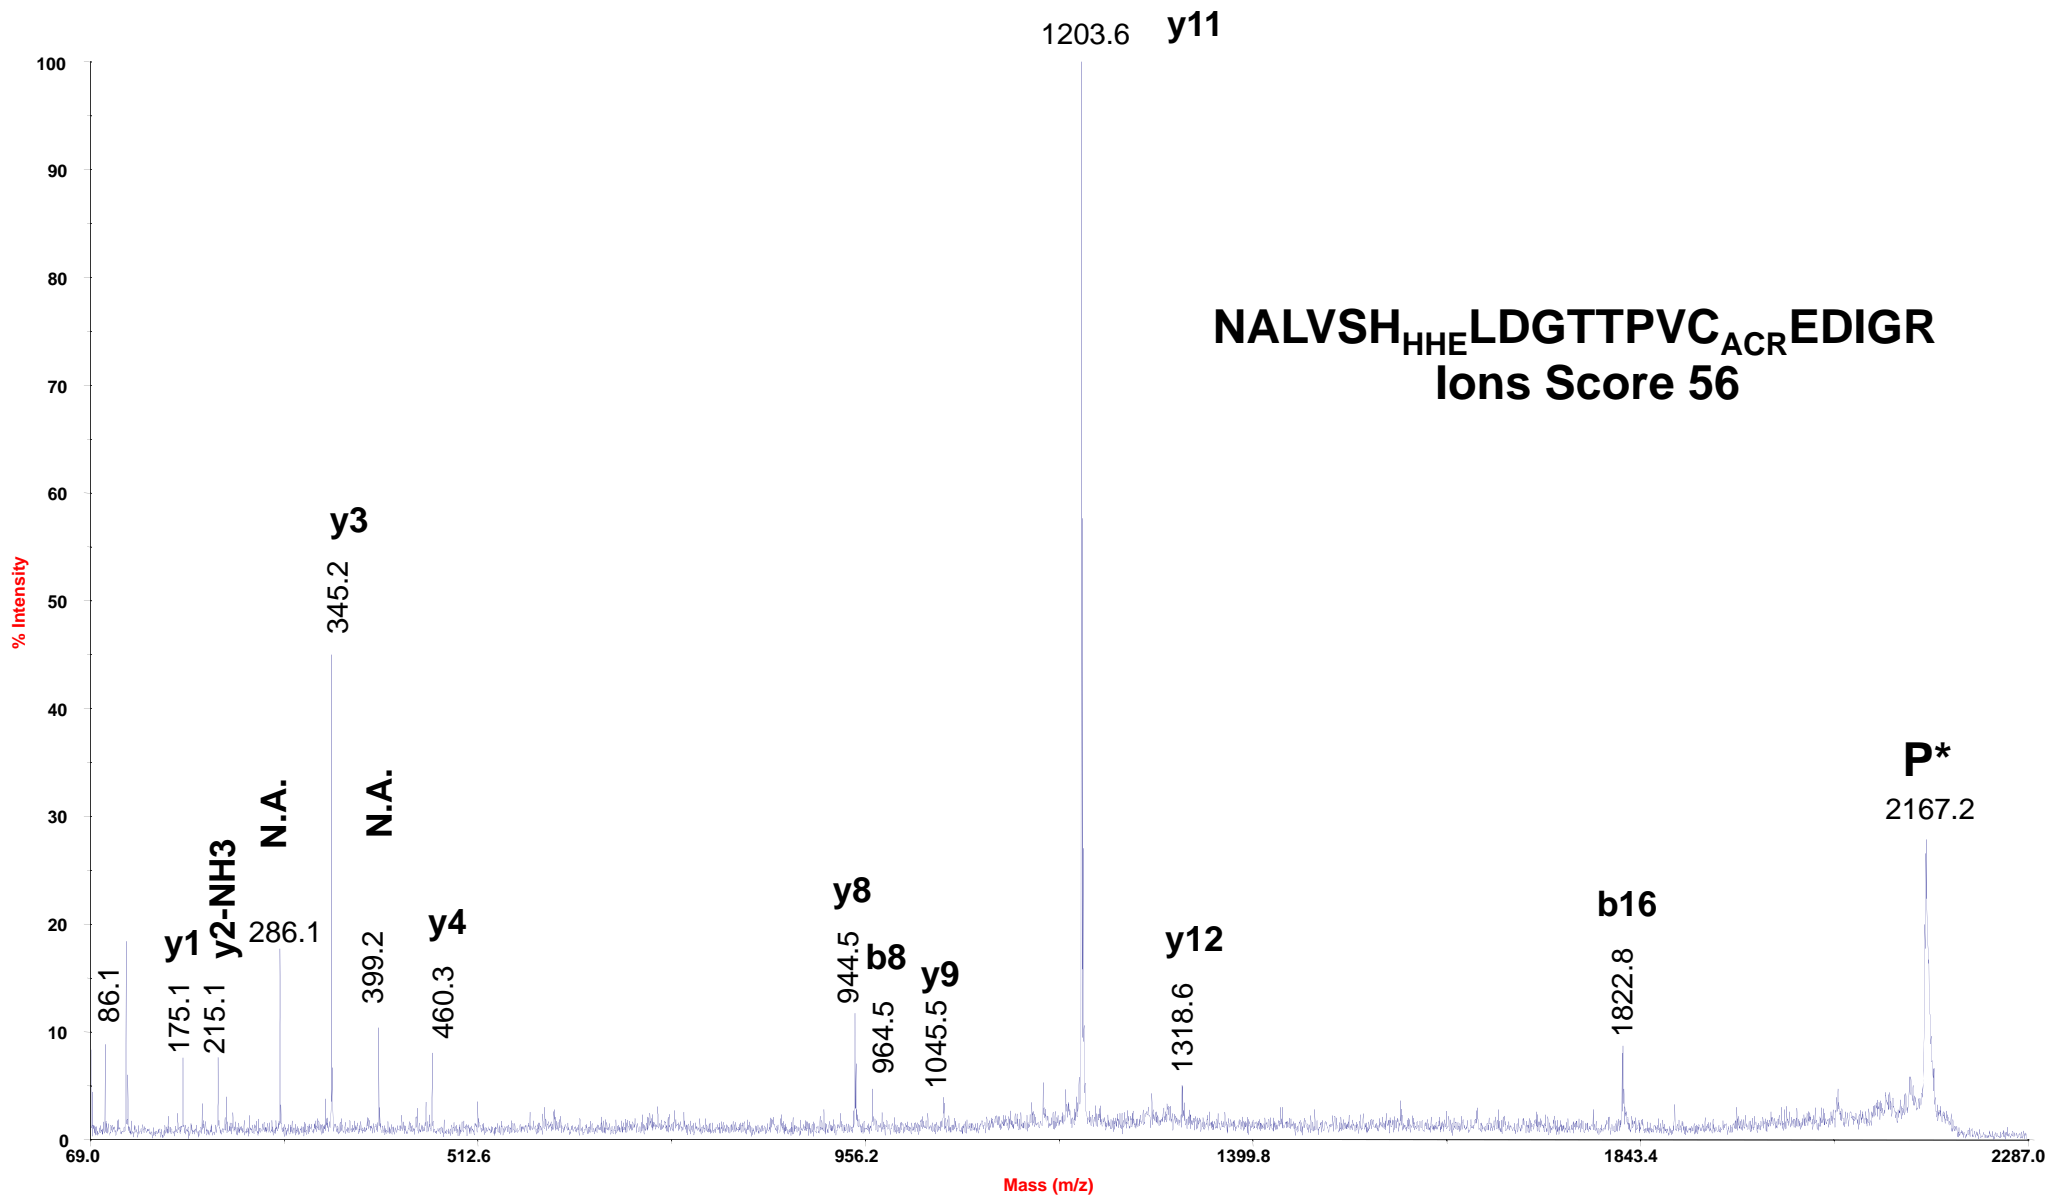

Figure S3-15  
4700 MS/MS Precursor 2067.05

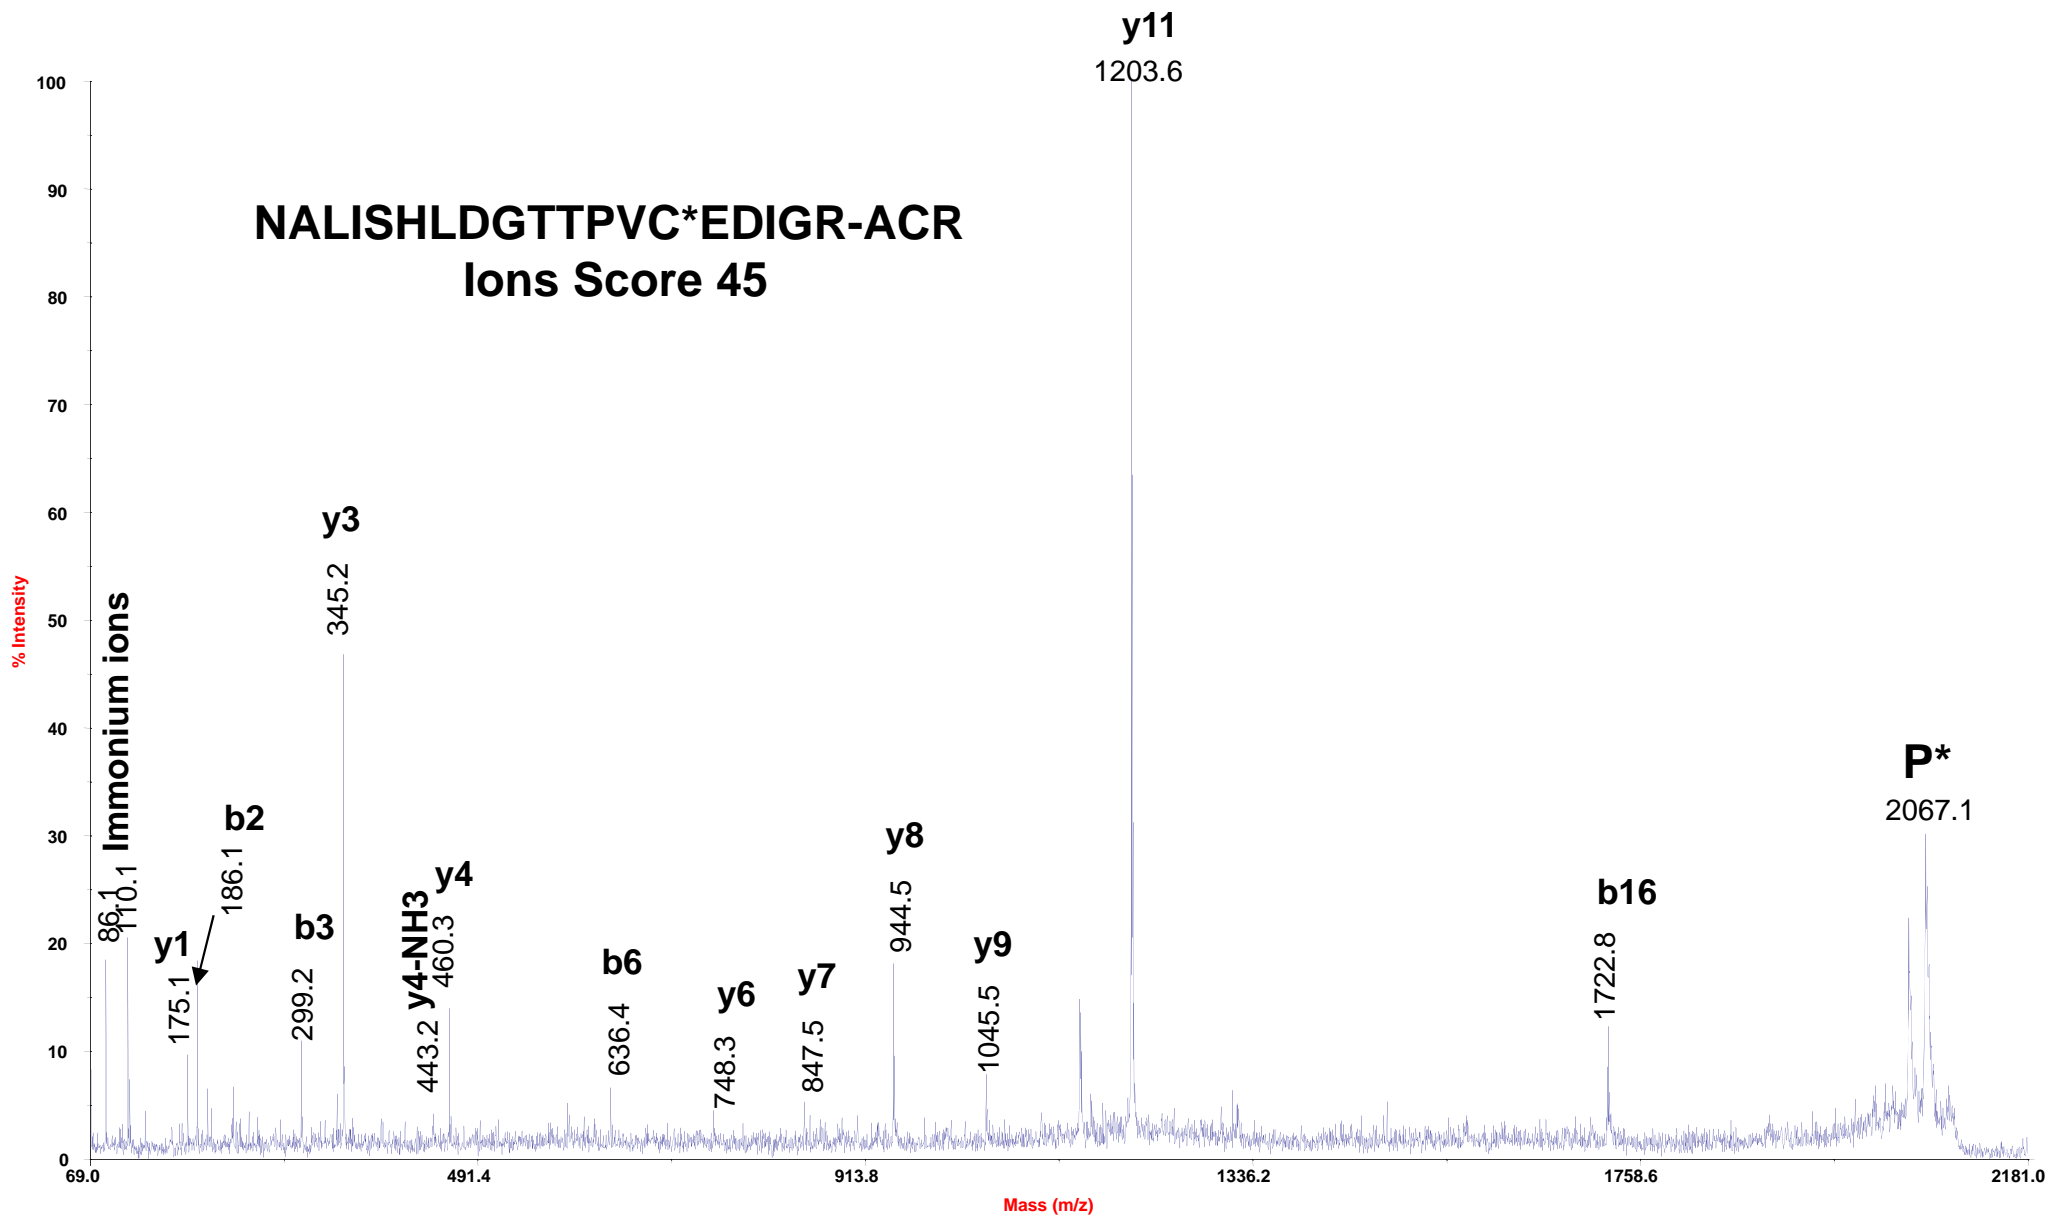

# Figure S3-16,17,18

NALANPLYC\*PDYR  
UQCR2\_RAT, 183-195

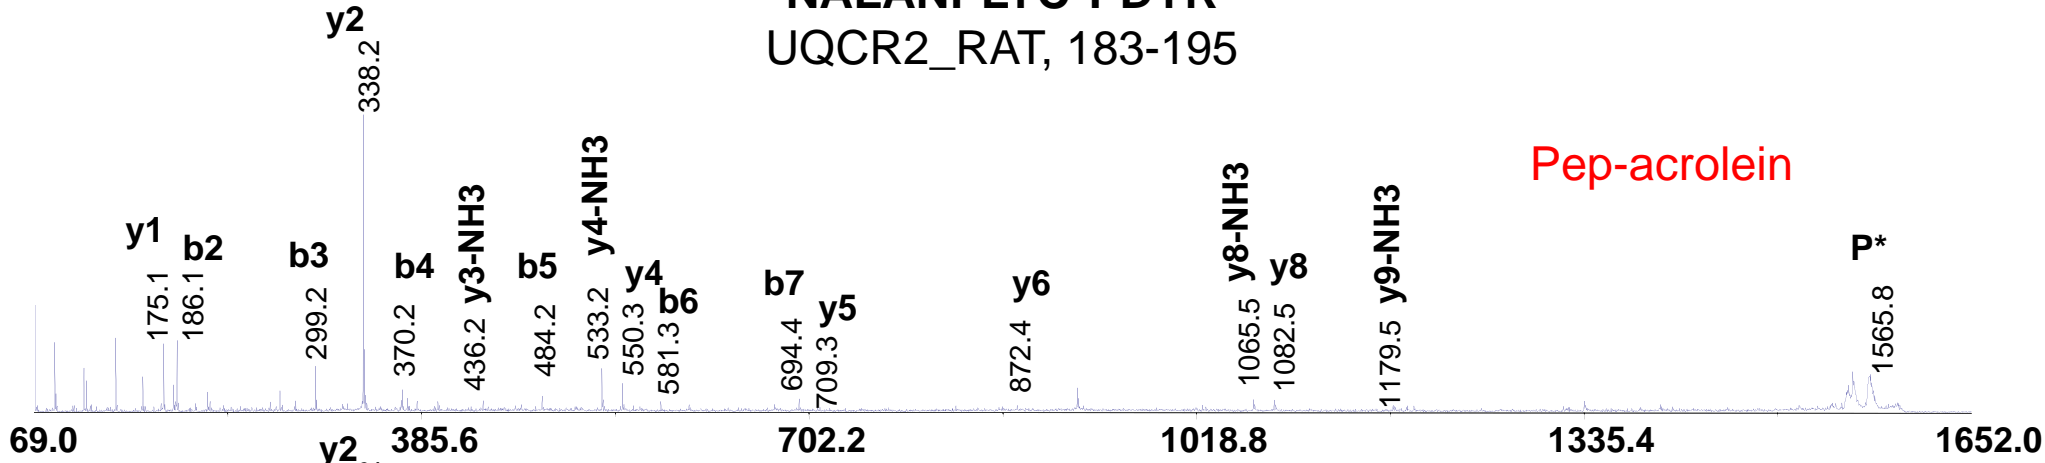

Pep-acrolein

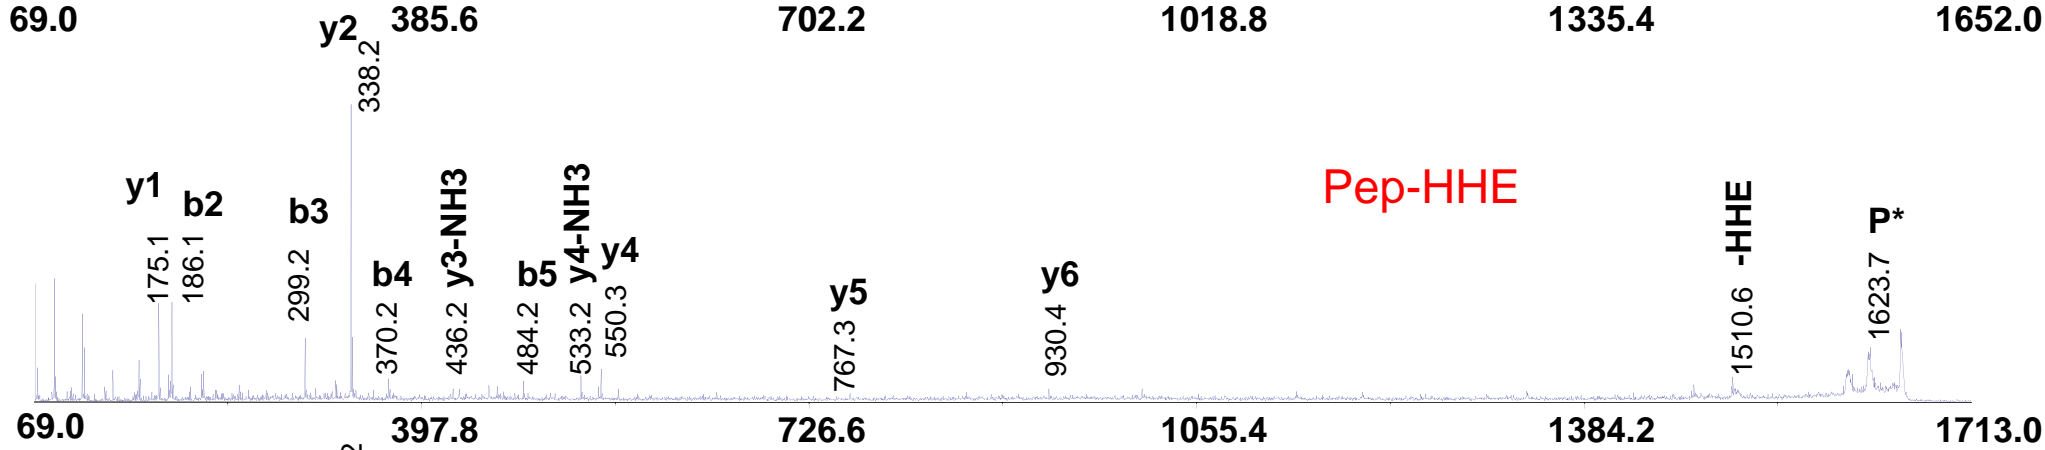

Pep-HHE

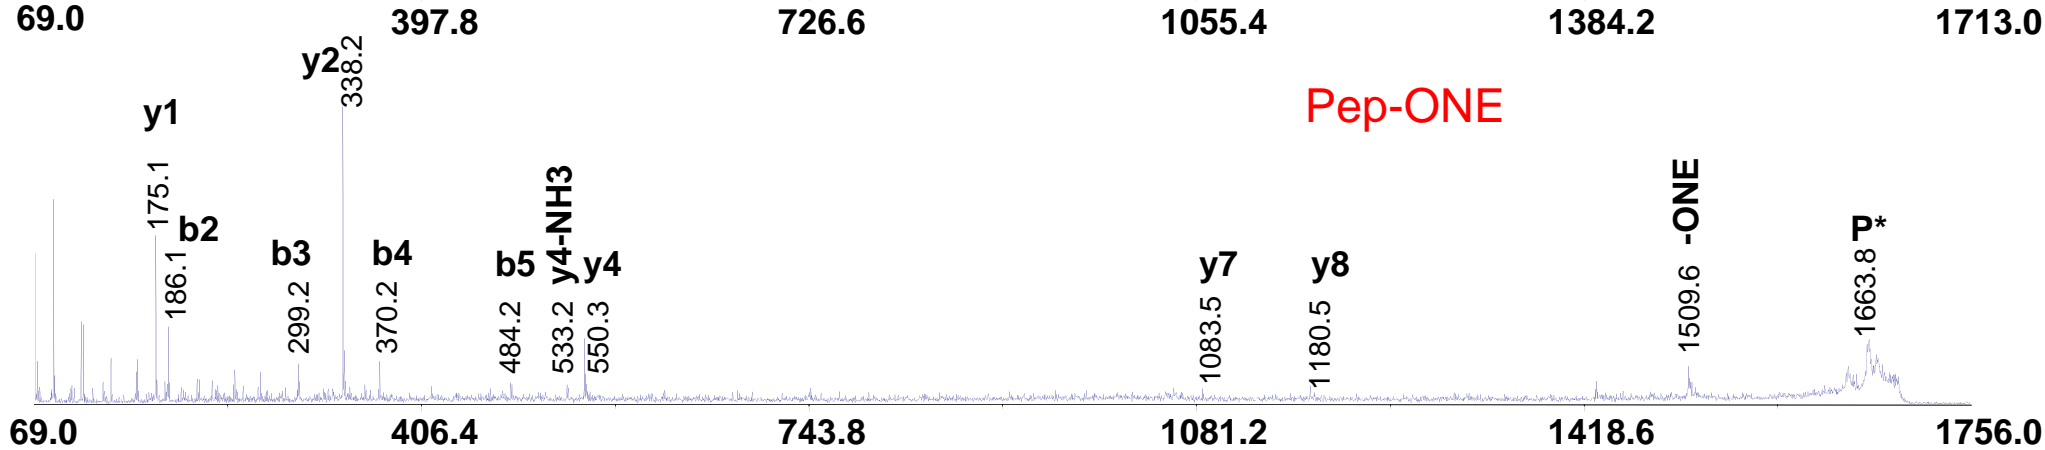

Pep-ONE

Mass (m/z)

**Figure S3-19**  
**4700 MS/MS Precursor 1665.89**

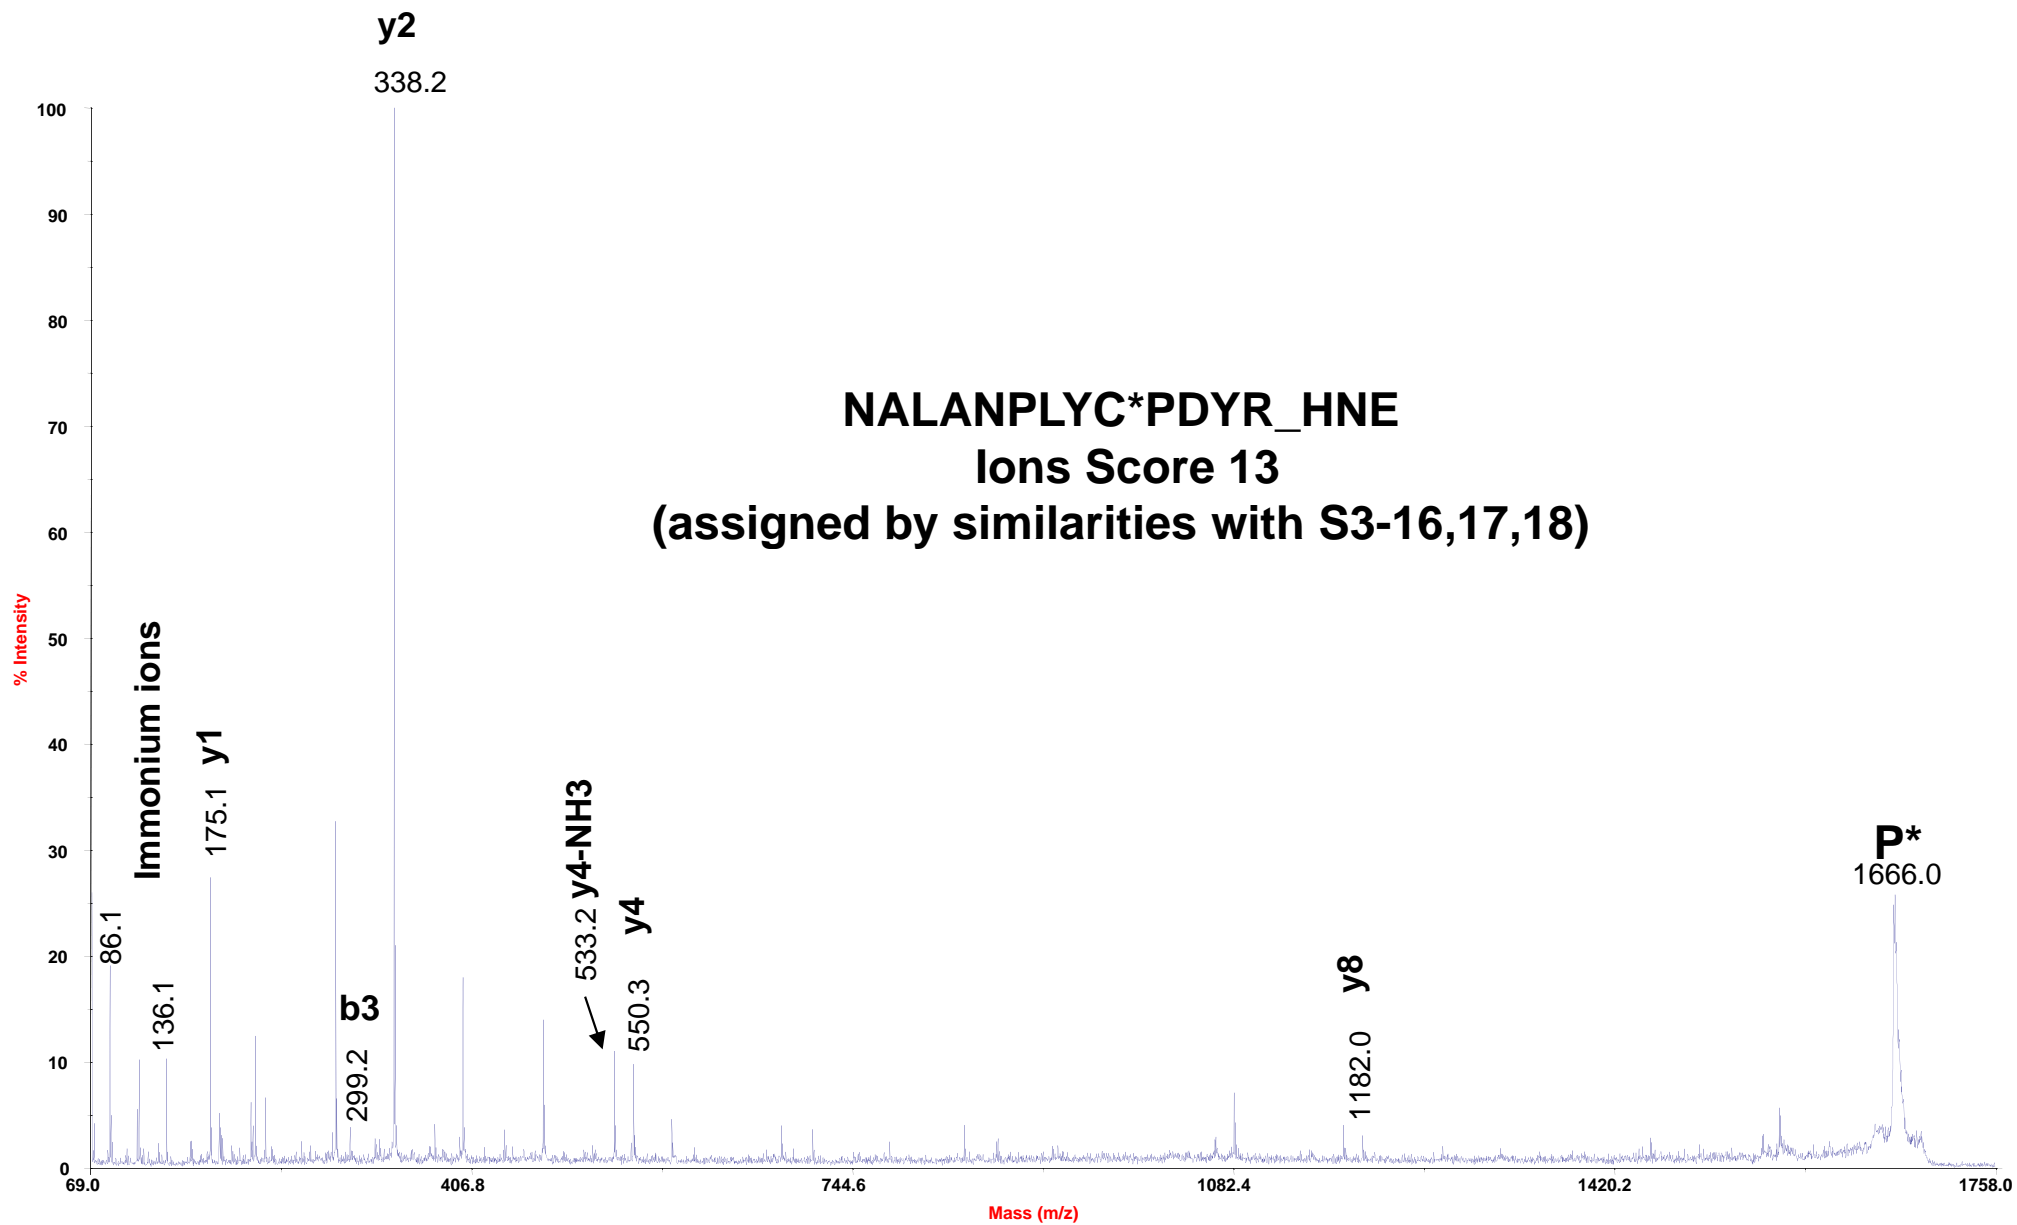

Figure S3-20  
4700 MS/MS Precursor 1533.79

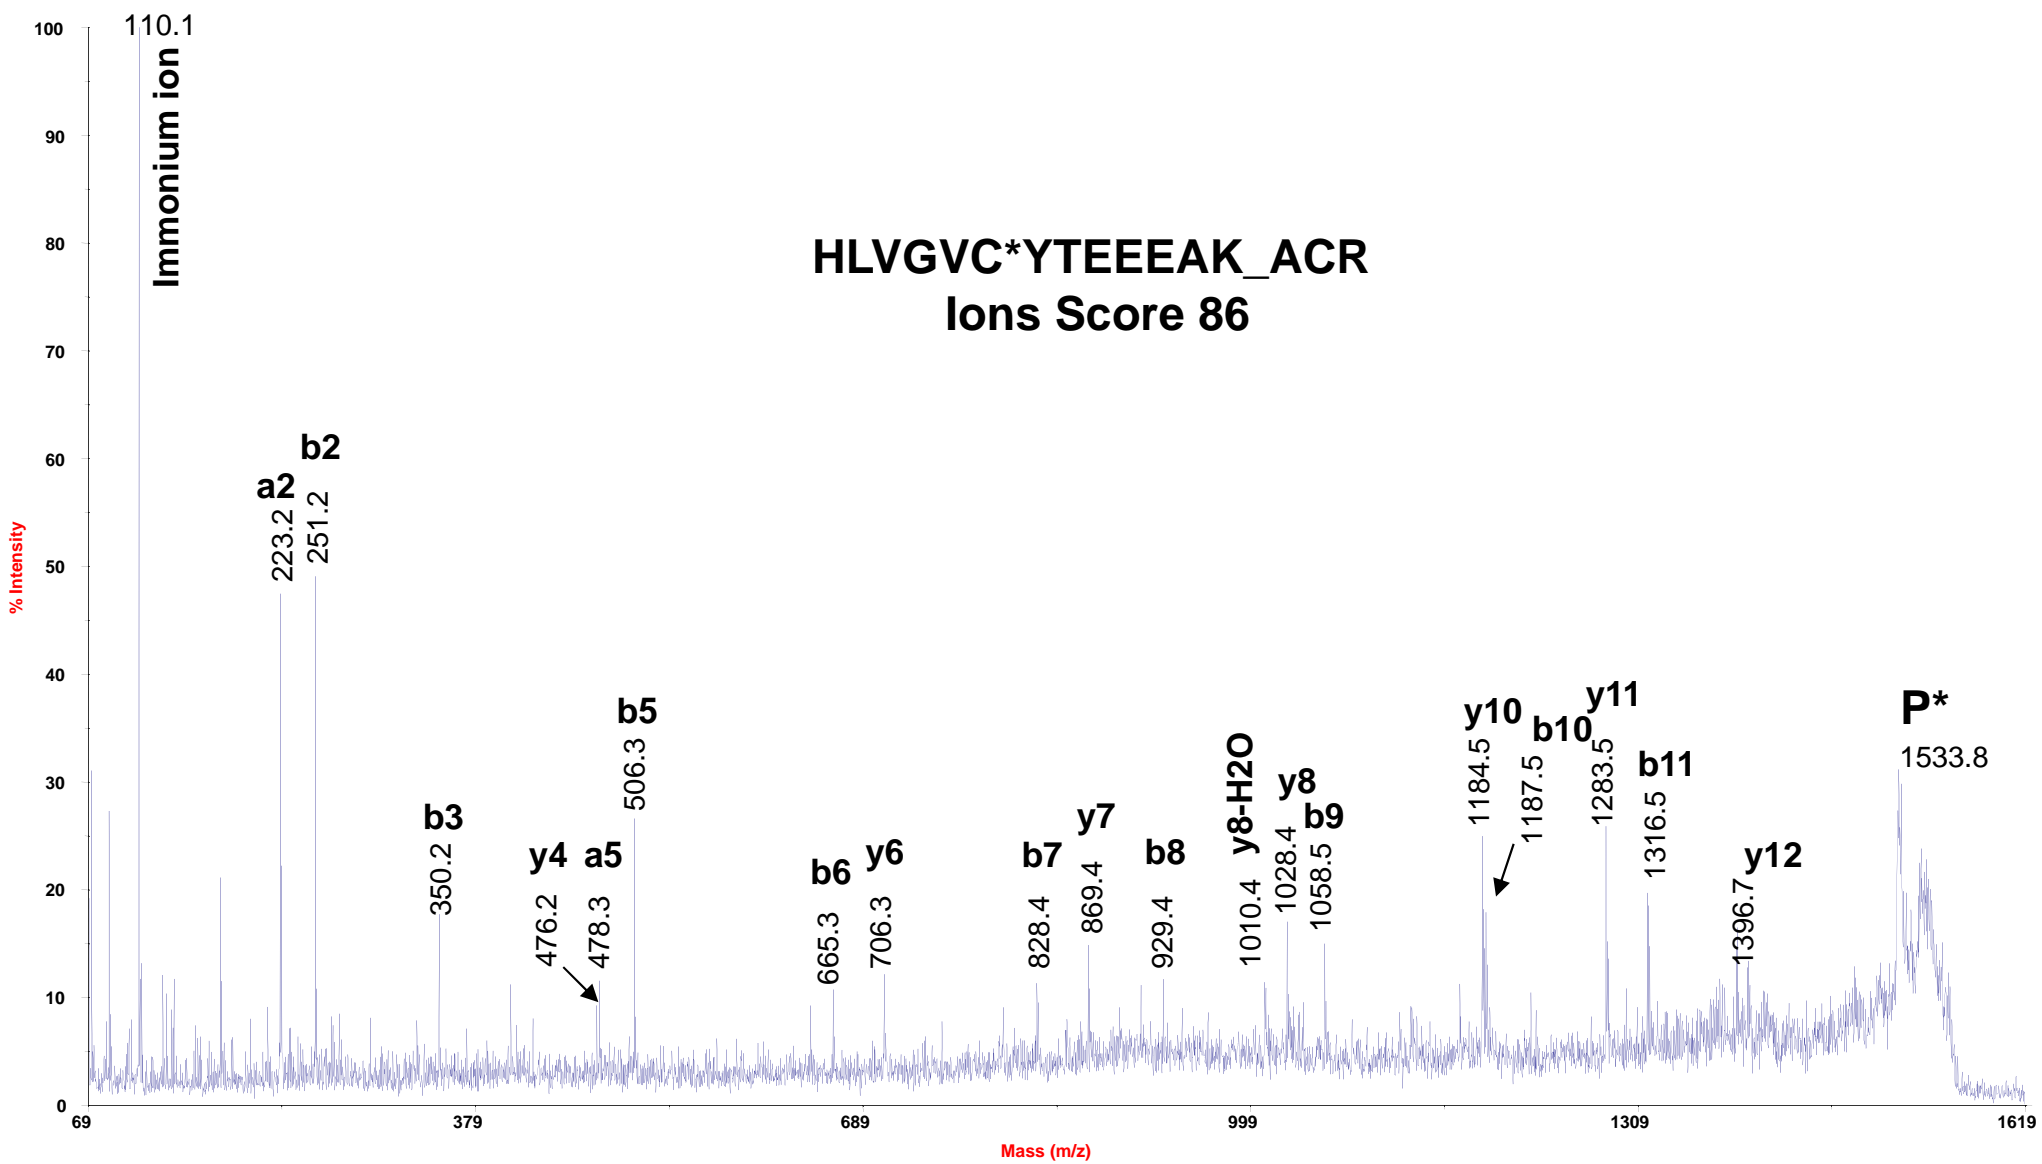

**Figure S3-21**  
**4700 MS/MS Precursor 1312.68**

**GDH\*GGAGANTWR\_HHE**  
**Ions Score 28**  
**(assigned by comparison with S3-22)**

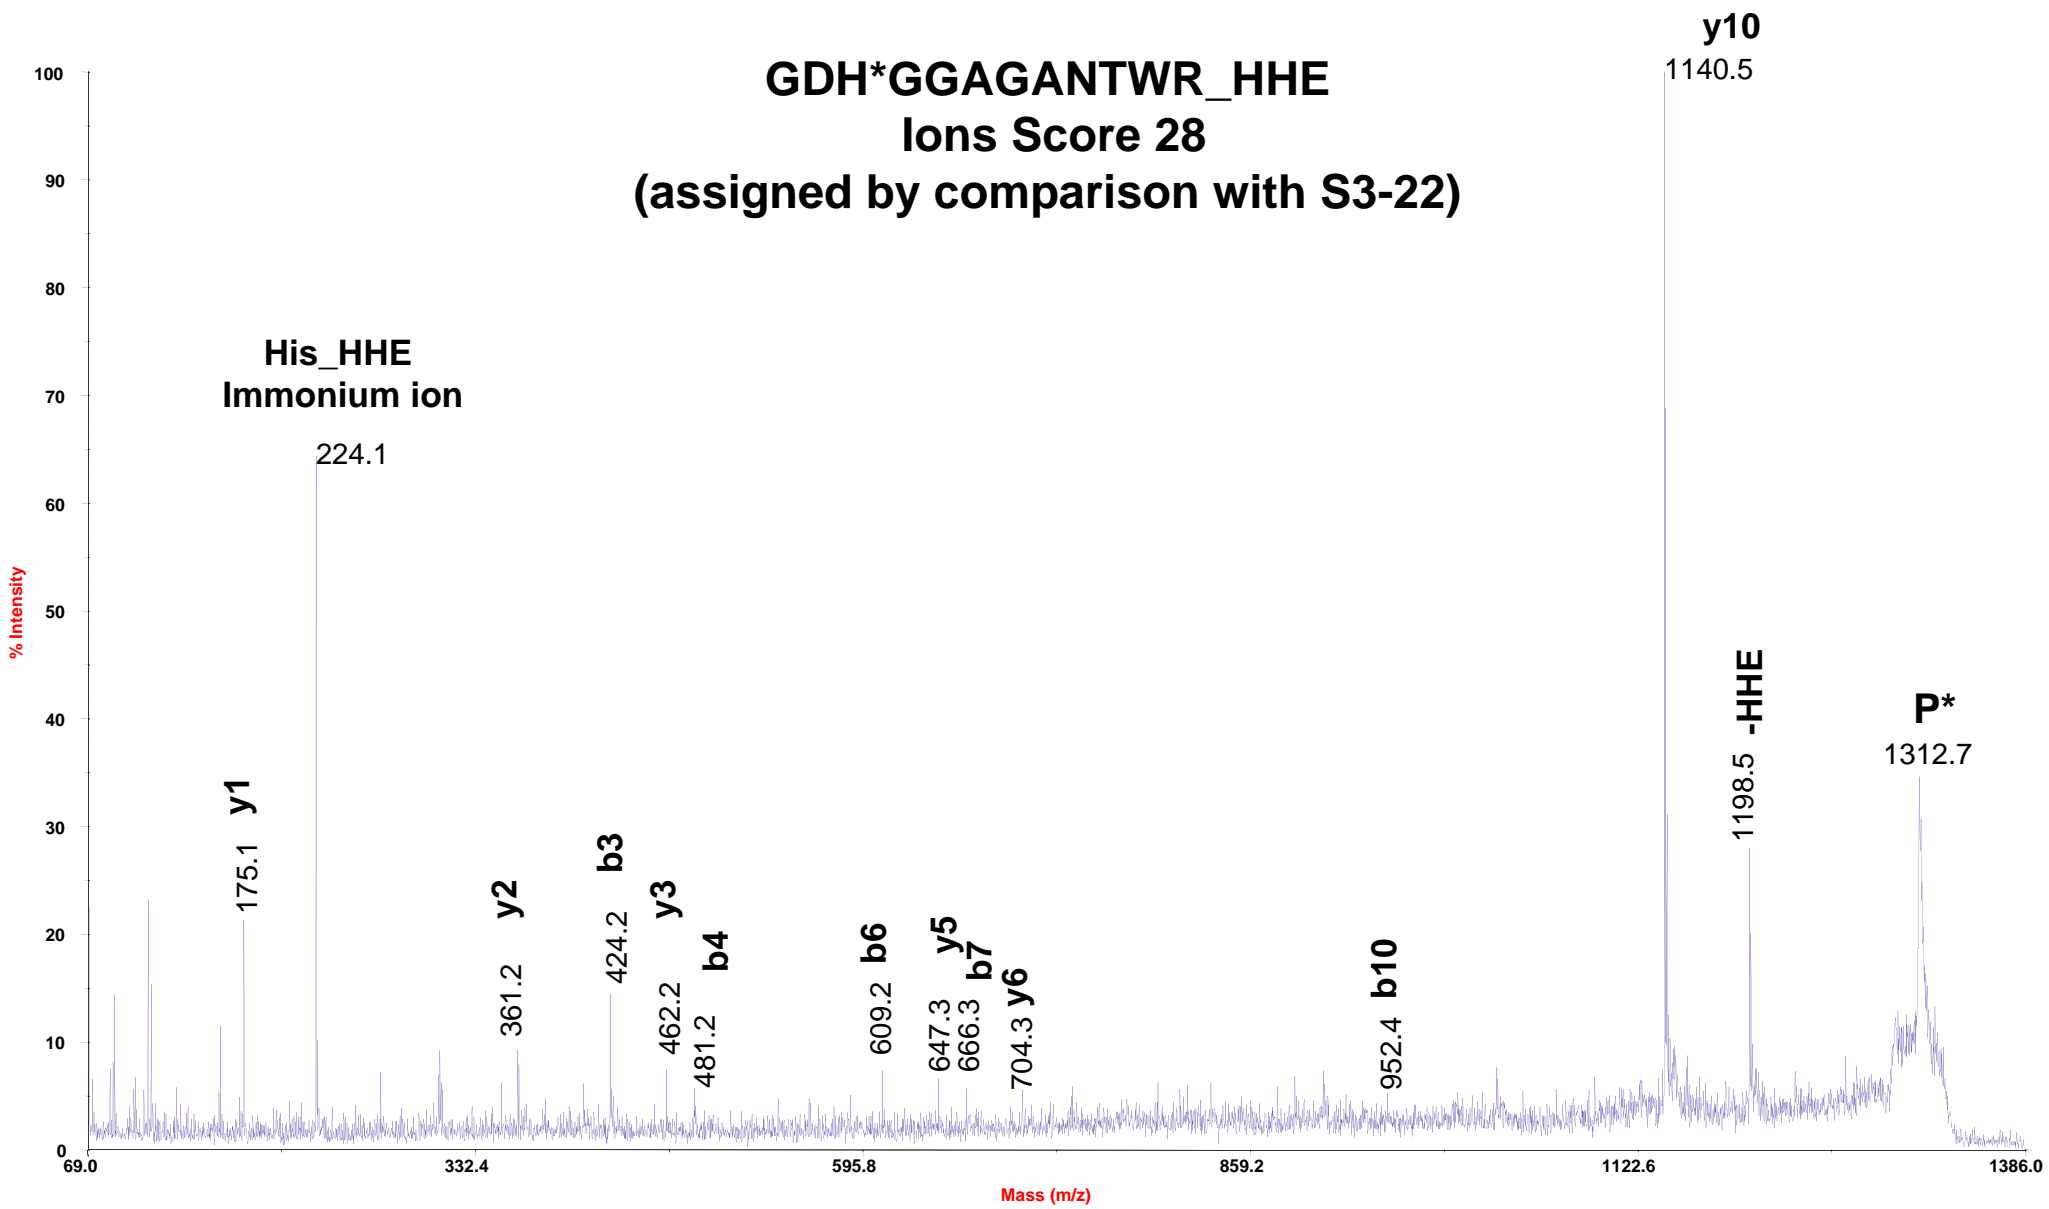

**Figure S3-22**  
**4700 MS/MS Precursor 1352.65**

**GDH\*GGAGANTWR\_ONE**  
**Ions Score 28**  
**(assigned by comparison with S3-21)**

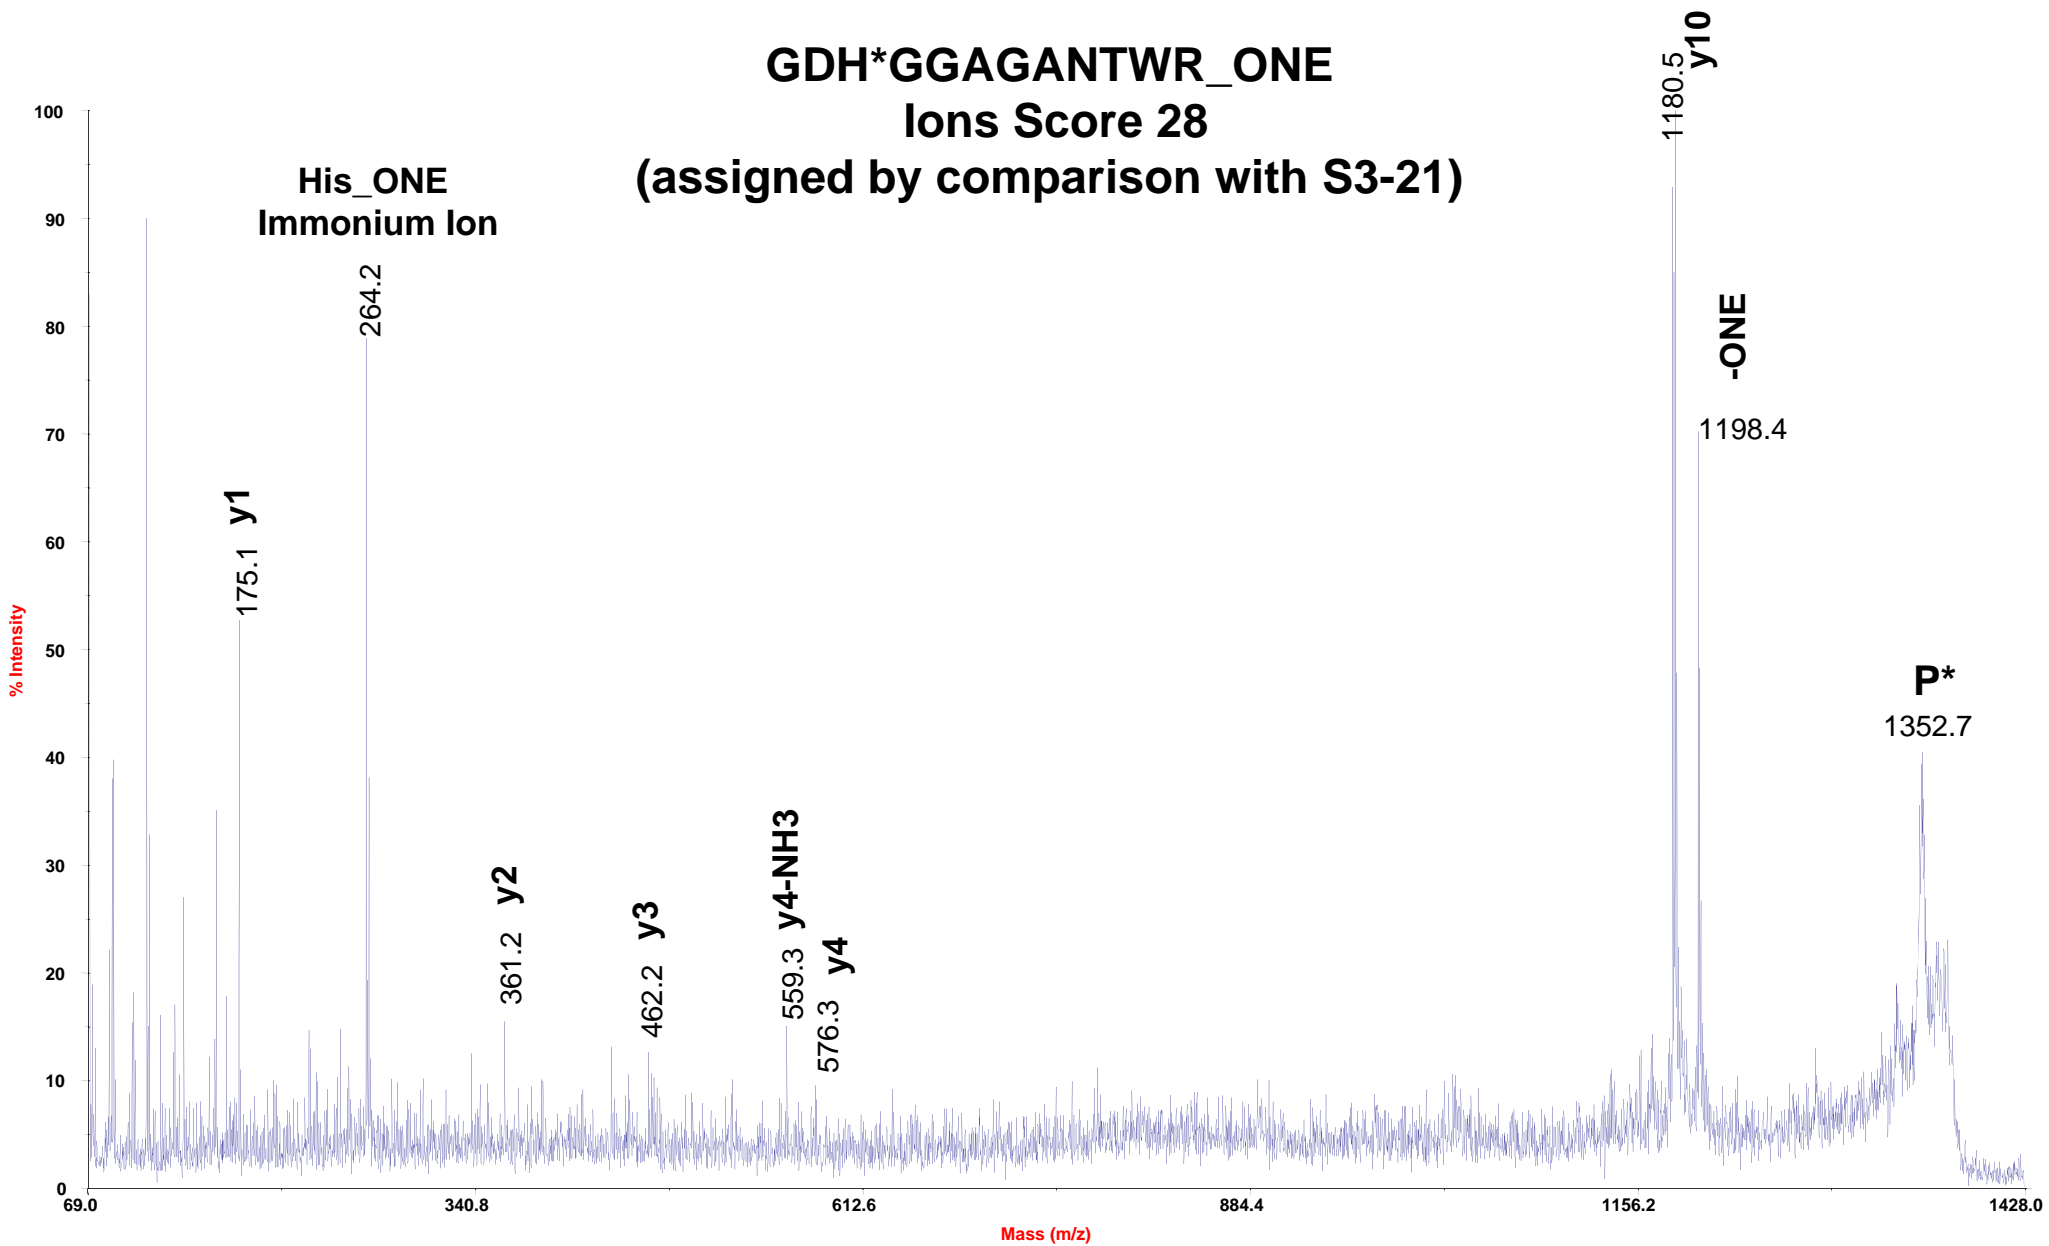

Figure S3-23  
4700 MS/MS Precursor 1813.9

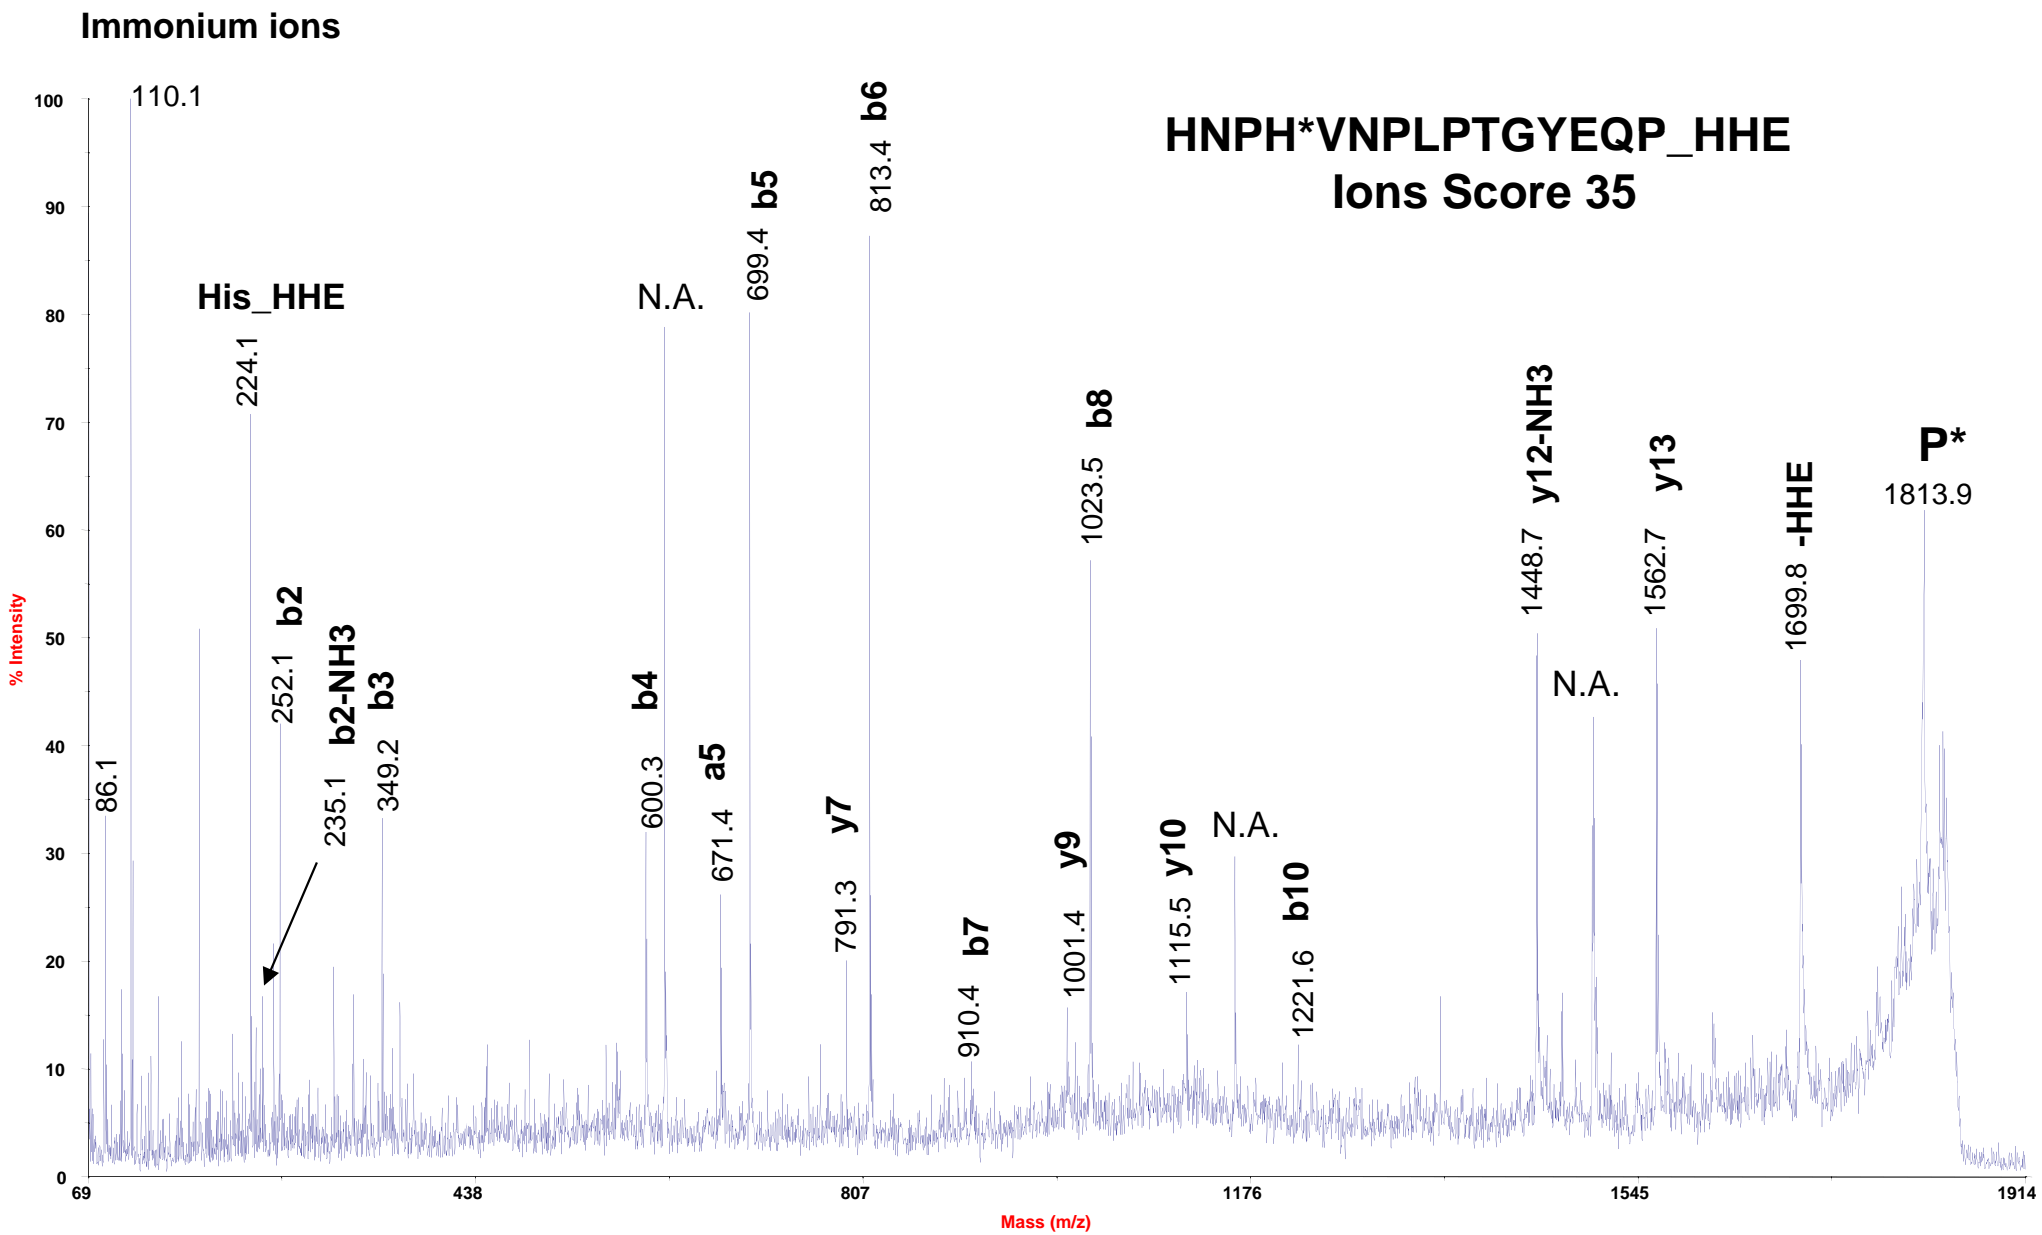



Figure S3-24  
4700 MS/MS Precursor 1384.65

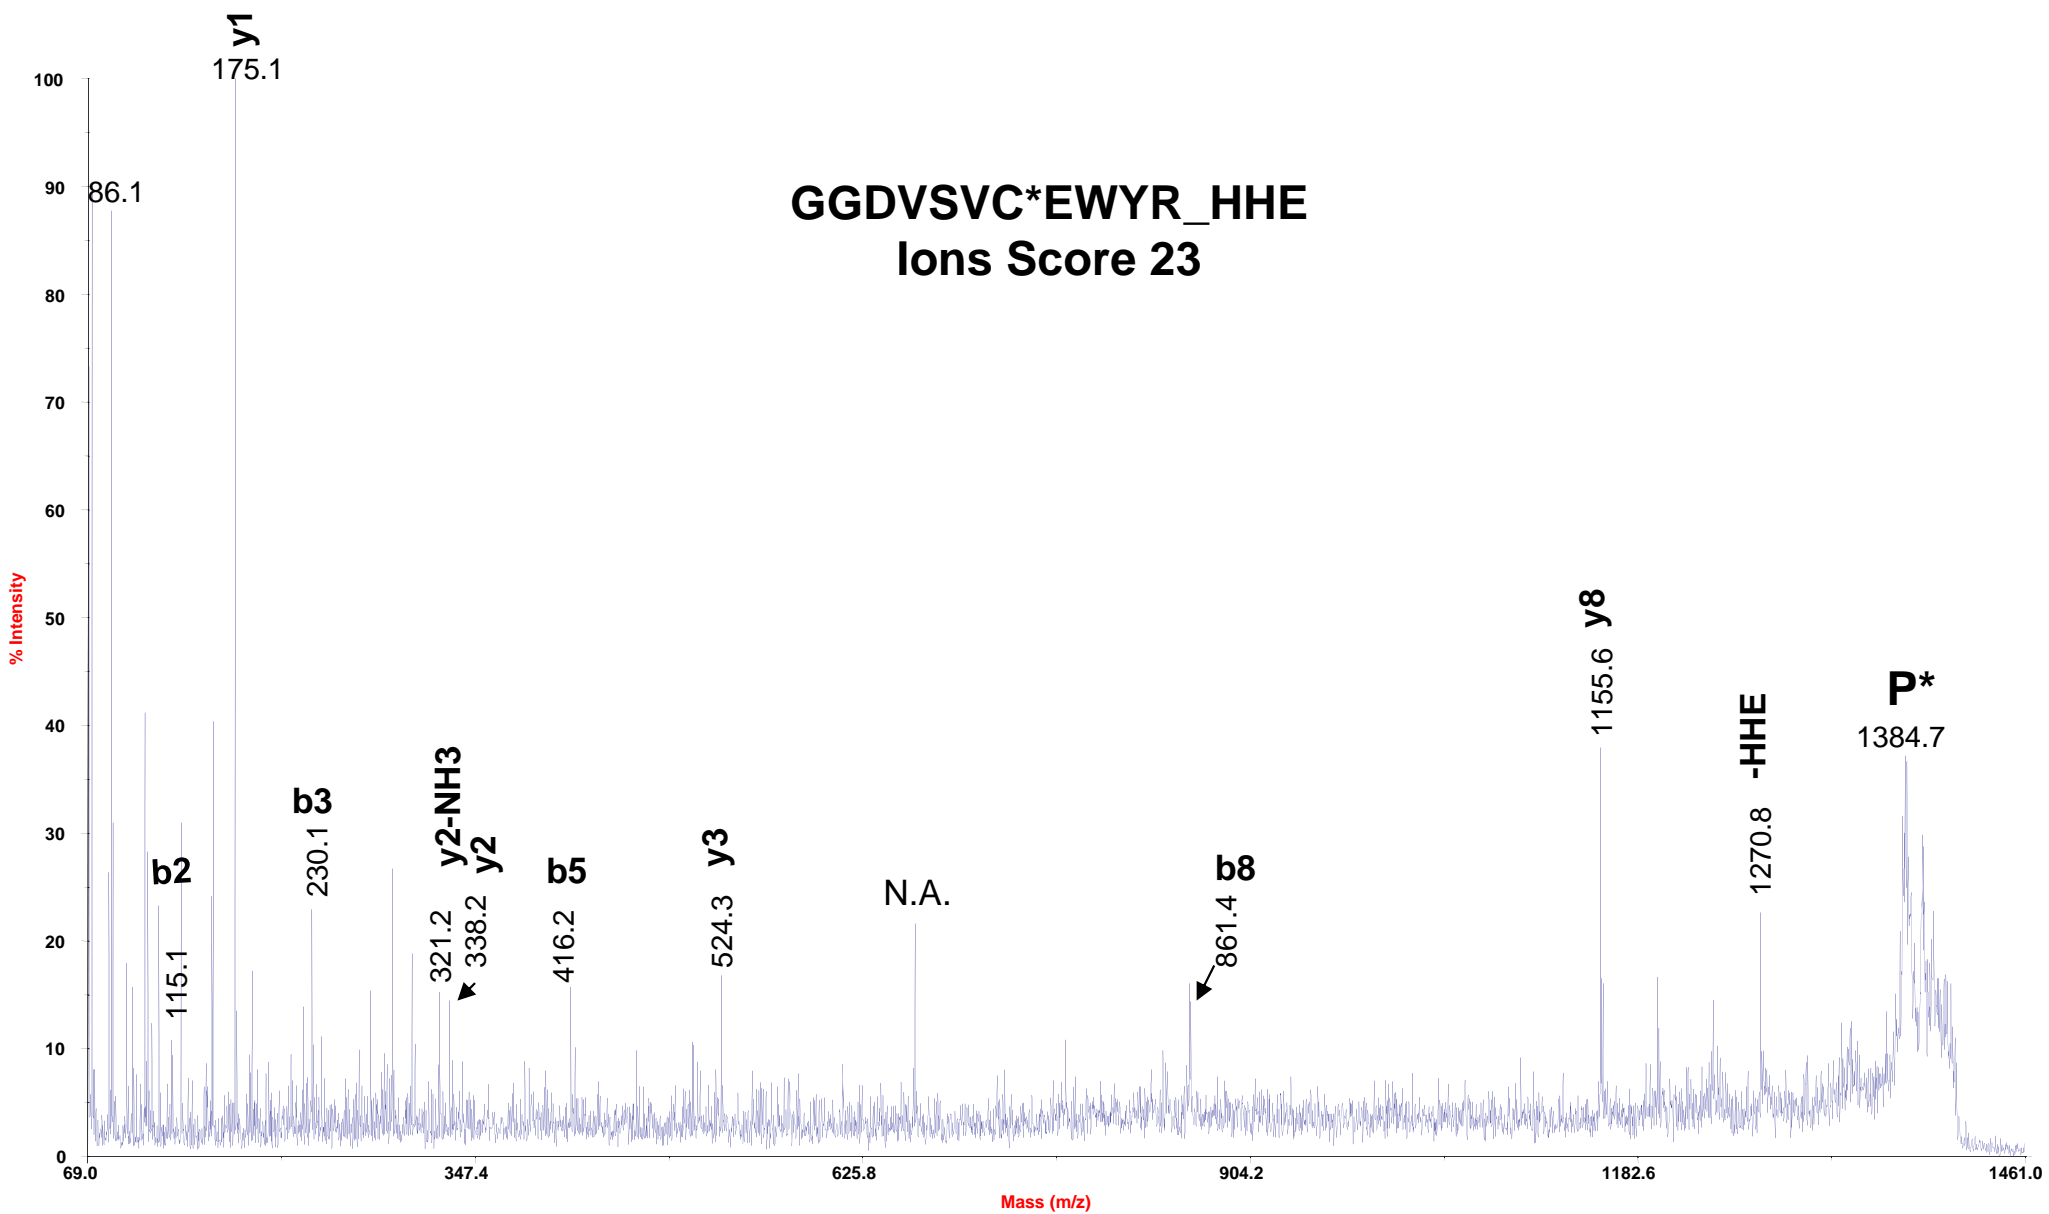

Figure S3-25  
4700 MS/MS Precursor 1641.84

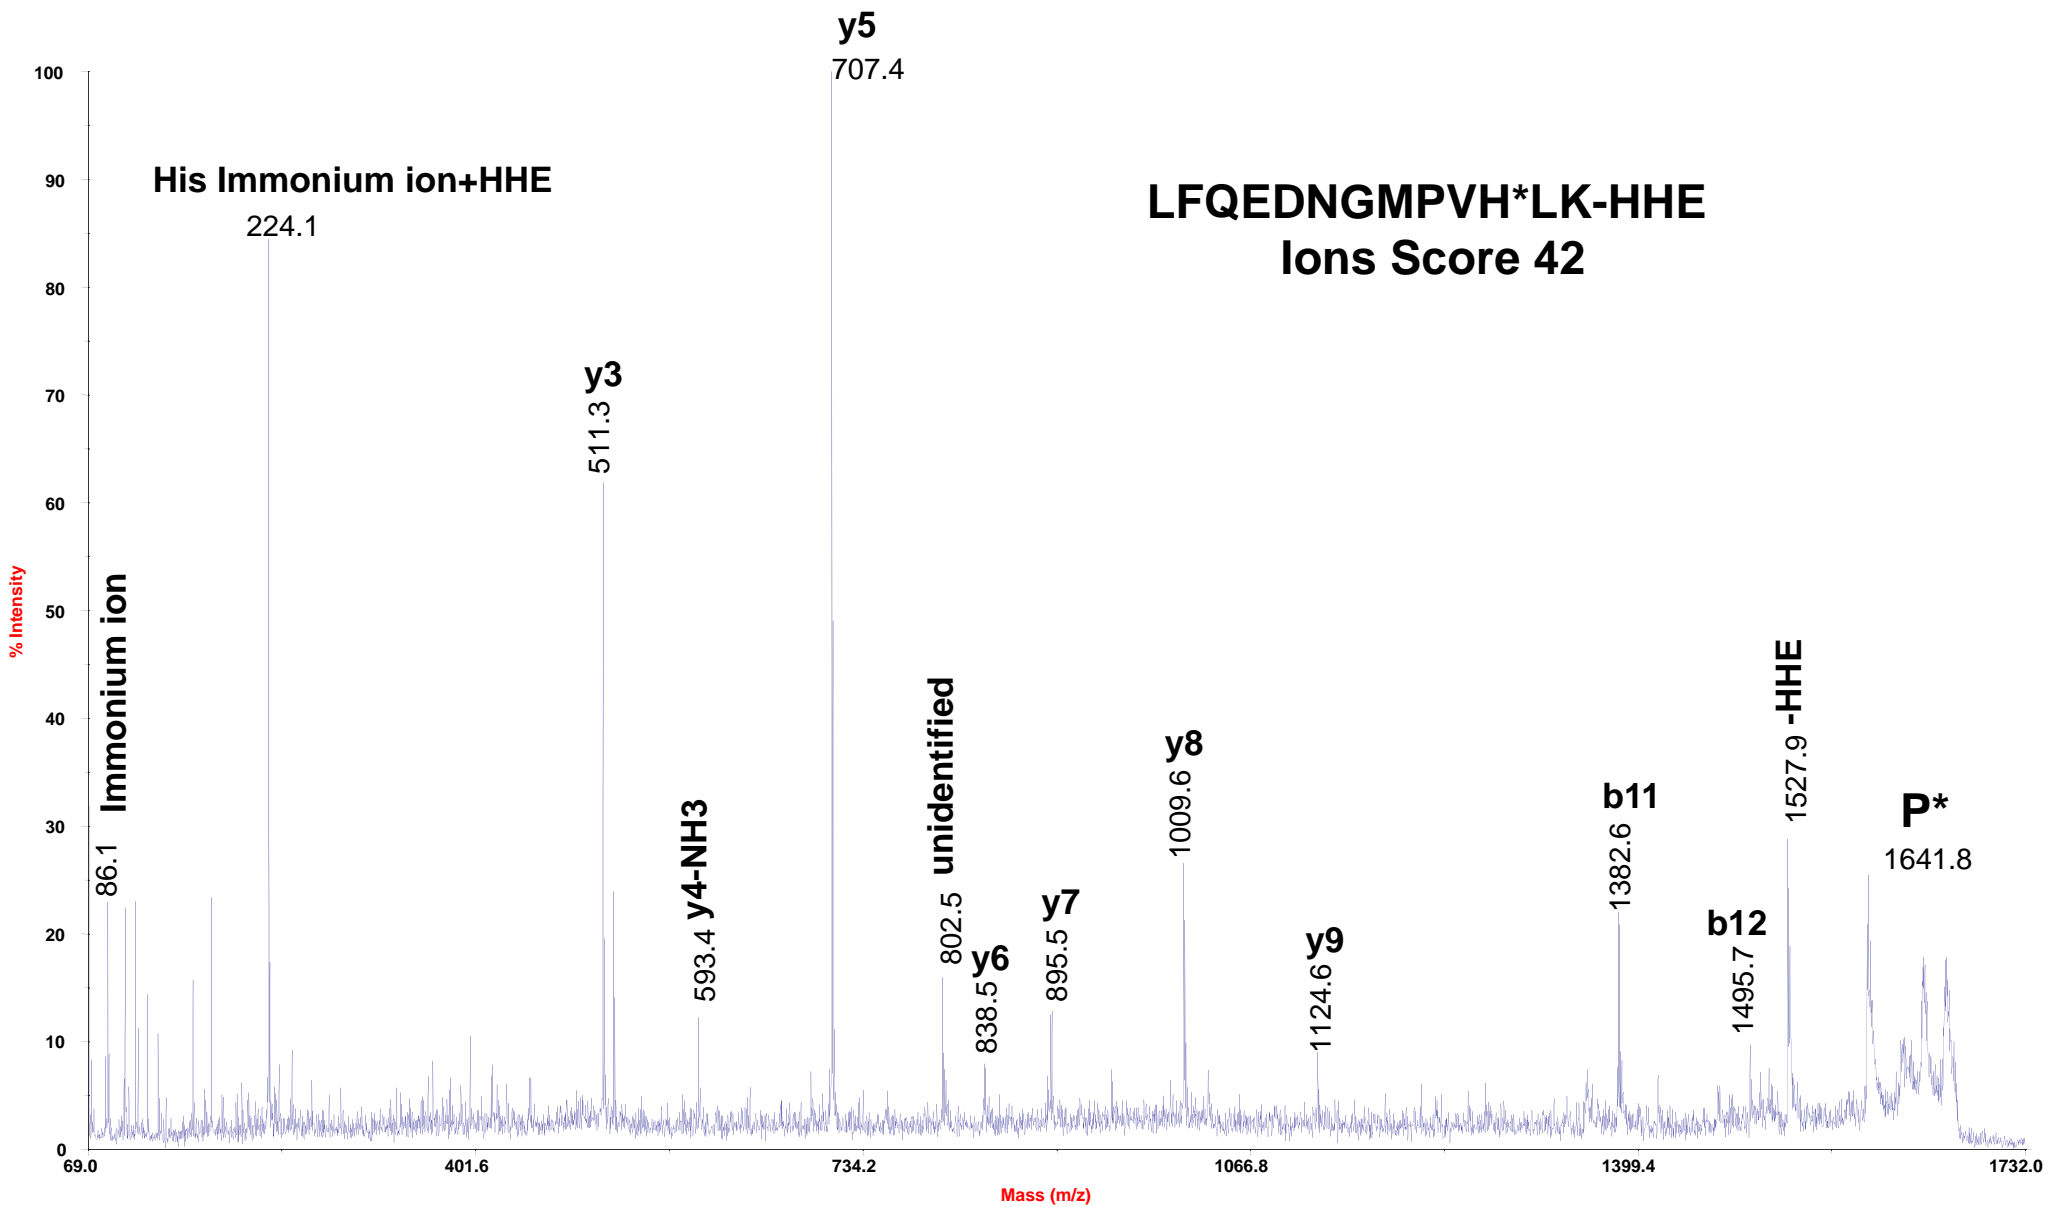

Figure S3-26  
4700 MS/MS Precursor 1930.02

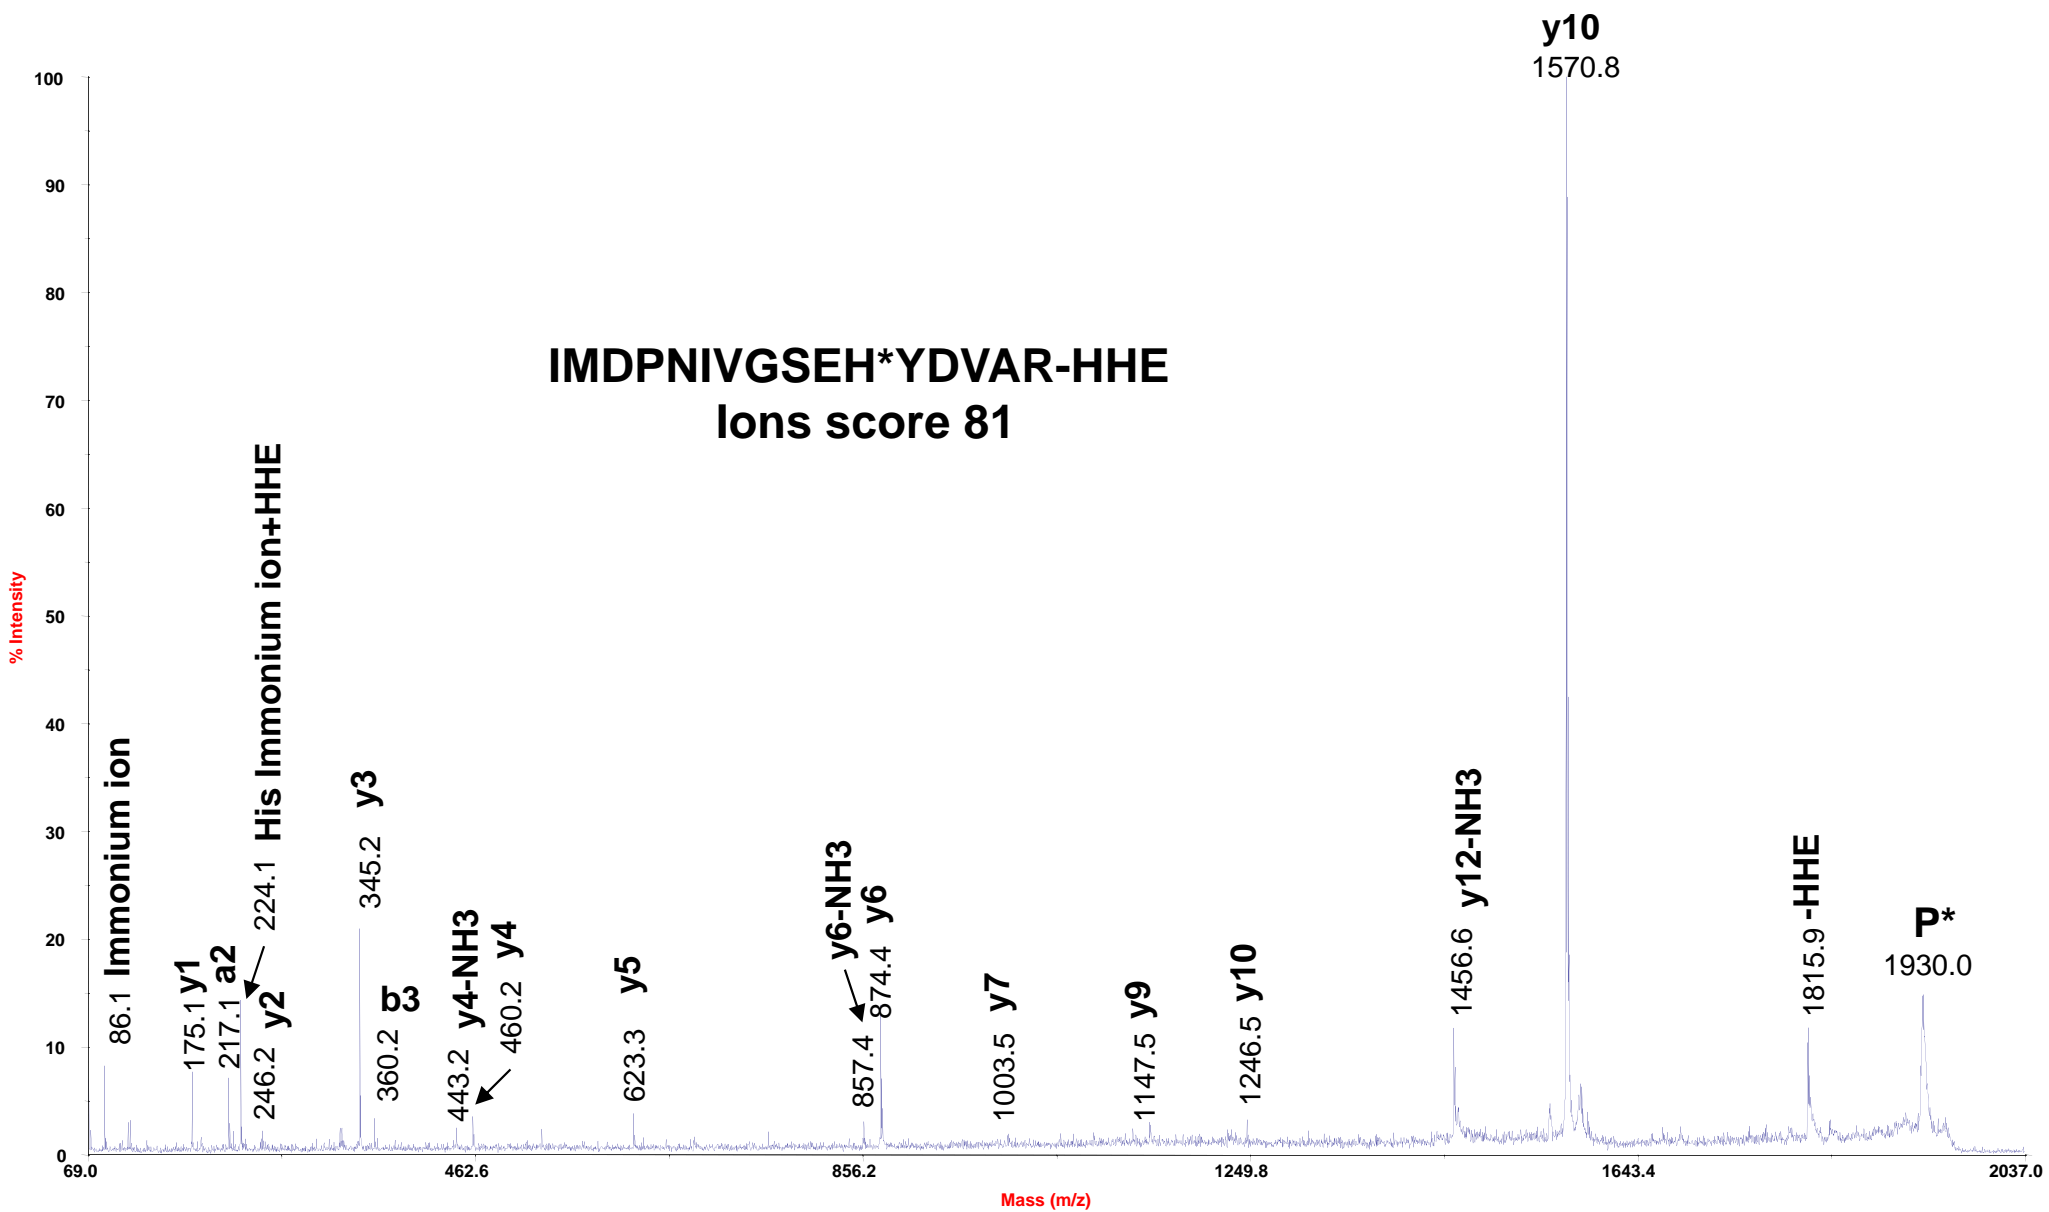

Figure S3-27  
4700 MS/MS Precursor 2375.33

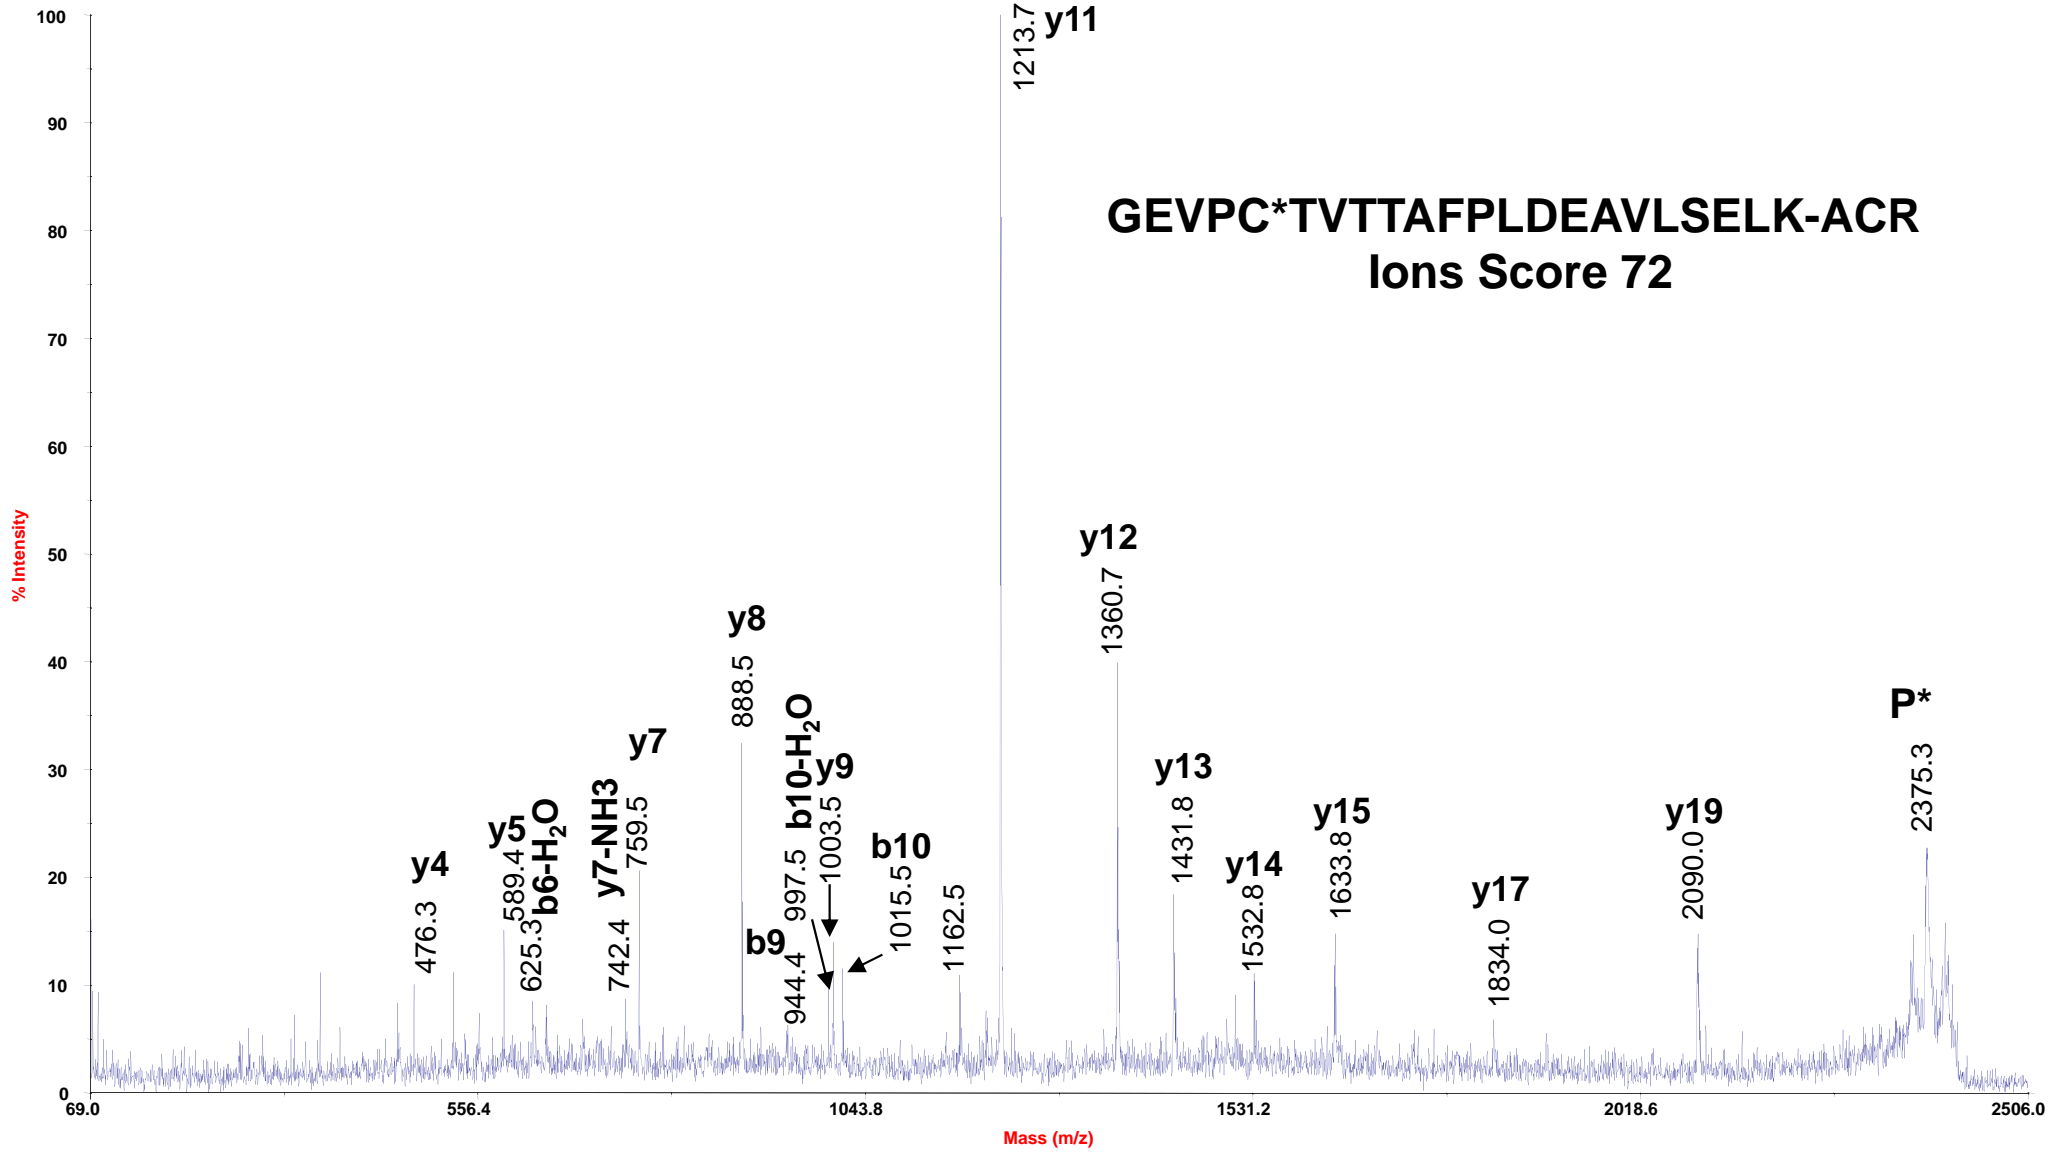

Figure S3-28  
4700 MS/MS Precursor 2273.18

VAVPSTI(HC)\*DHLIEAQLGGEK\_ACR  
Ions Score 30

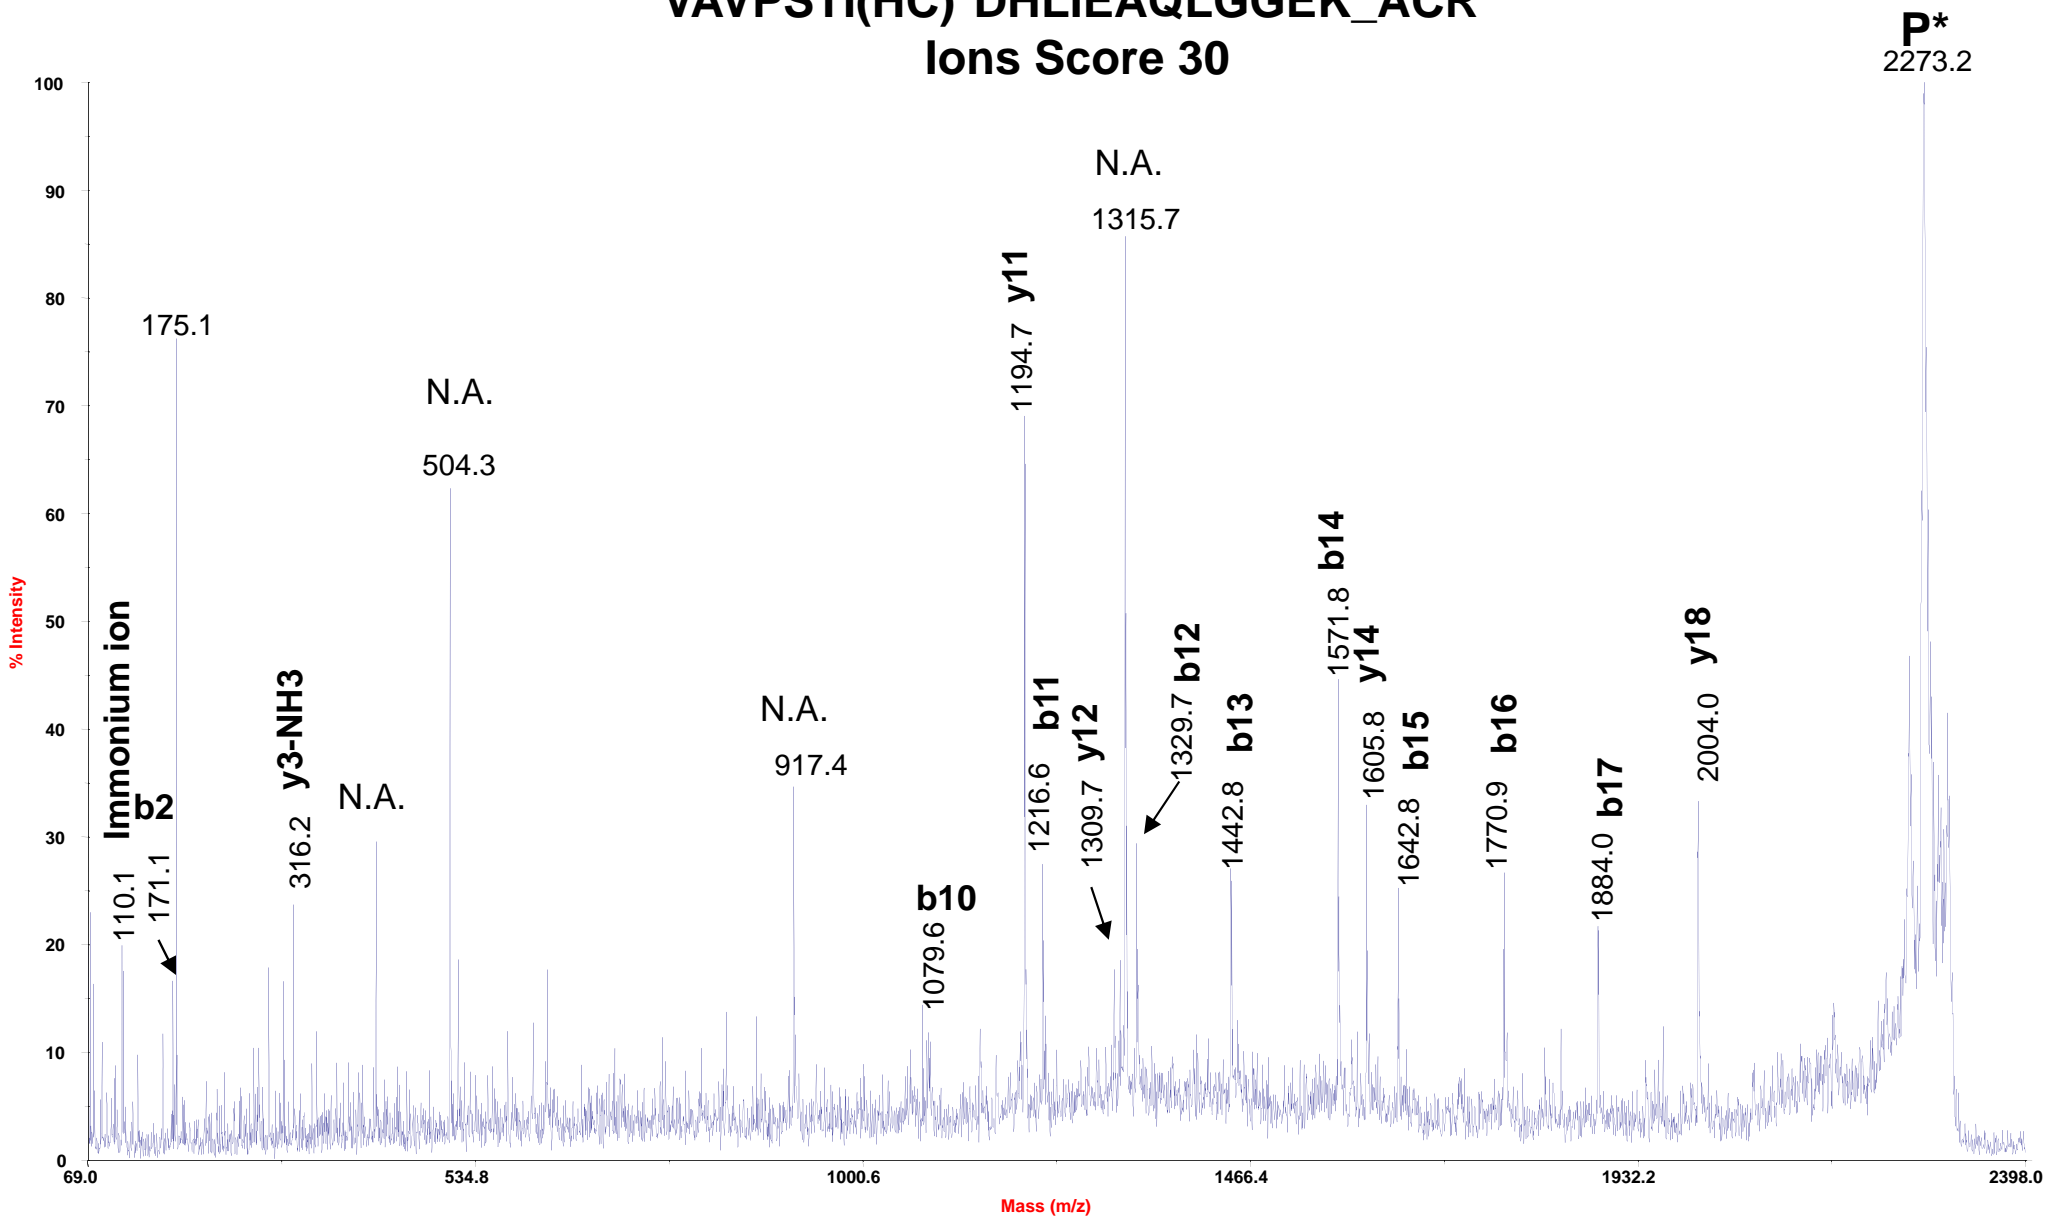

Figure S3-29  
4700 MS/MS Precursor 1488.76

**GYLGPEQLPDC\*LK\_ACR**  
**Ions Score 37**

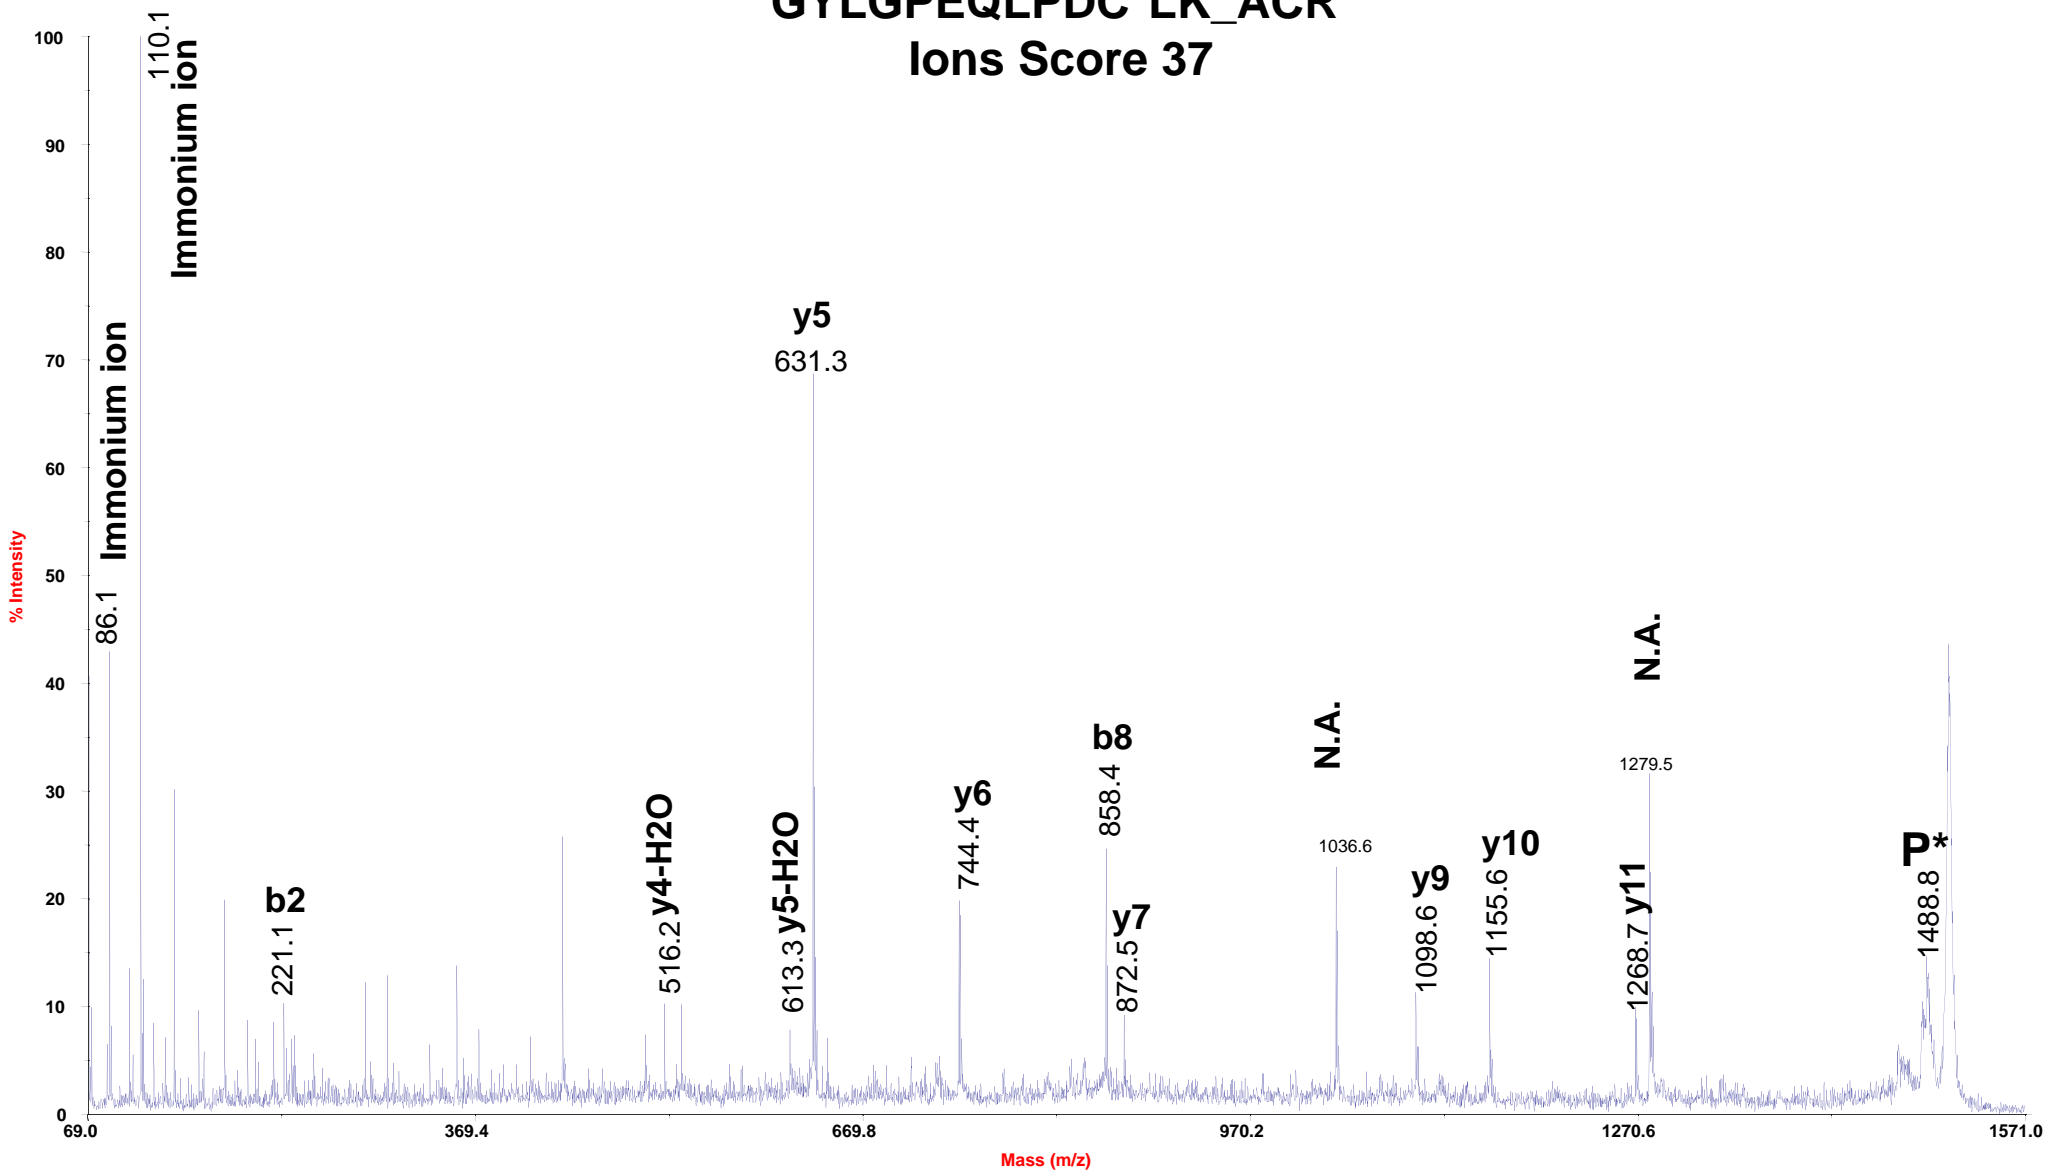

Figure S3-30  
4700 MS/MS Precursor 1458.76

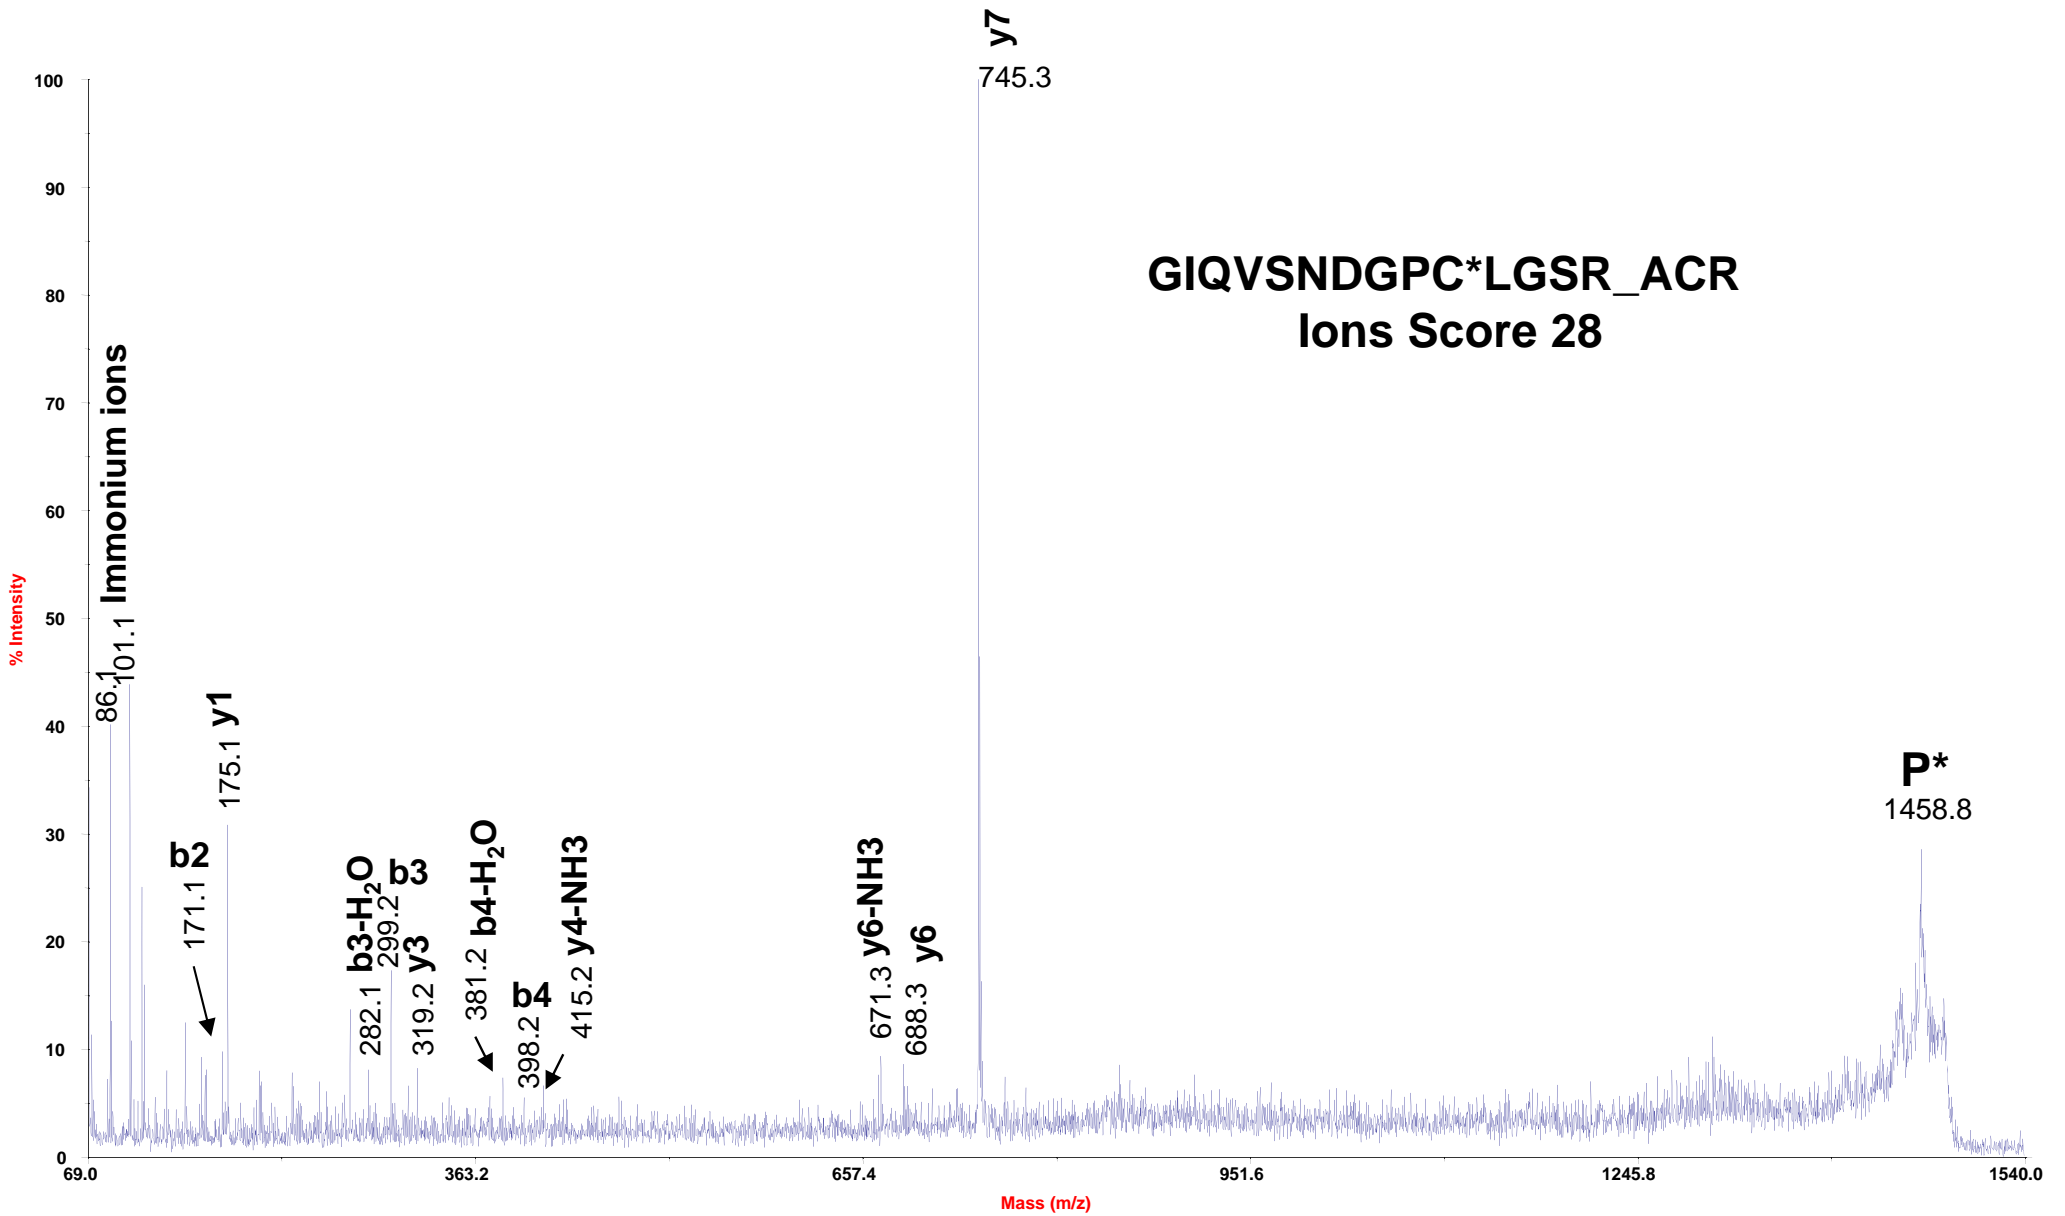

Figure S3-31  
4700 MS/MS Precursor 1643.77

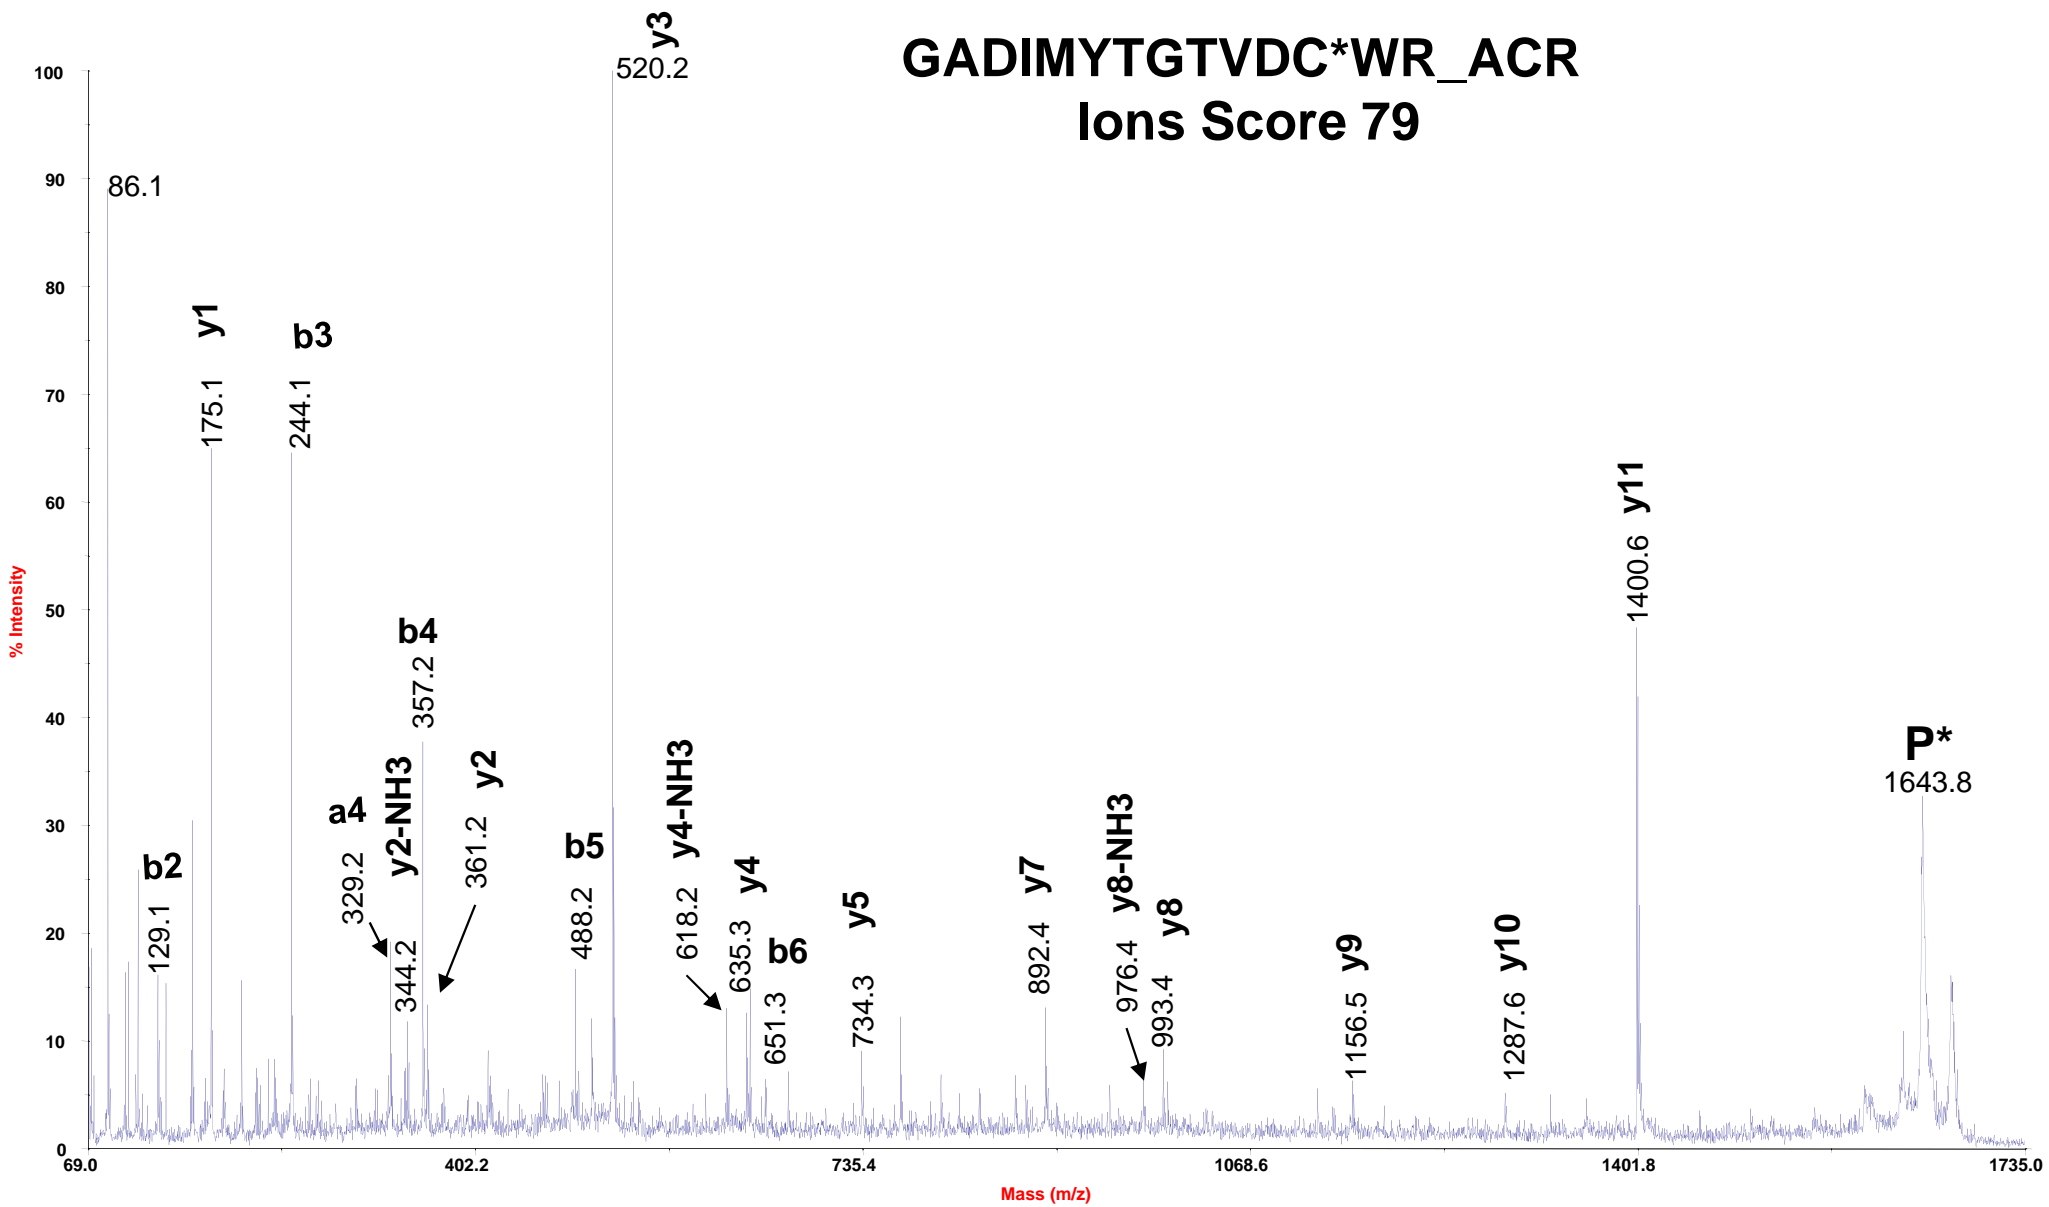



Figure S3-32  
4700 MS/MS Precursor 1701.77

**GADIMYTGTVDC\*WR\_HHE**  
**Ions Score 27**

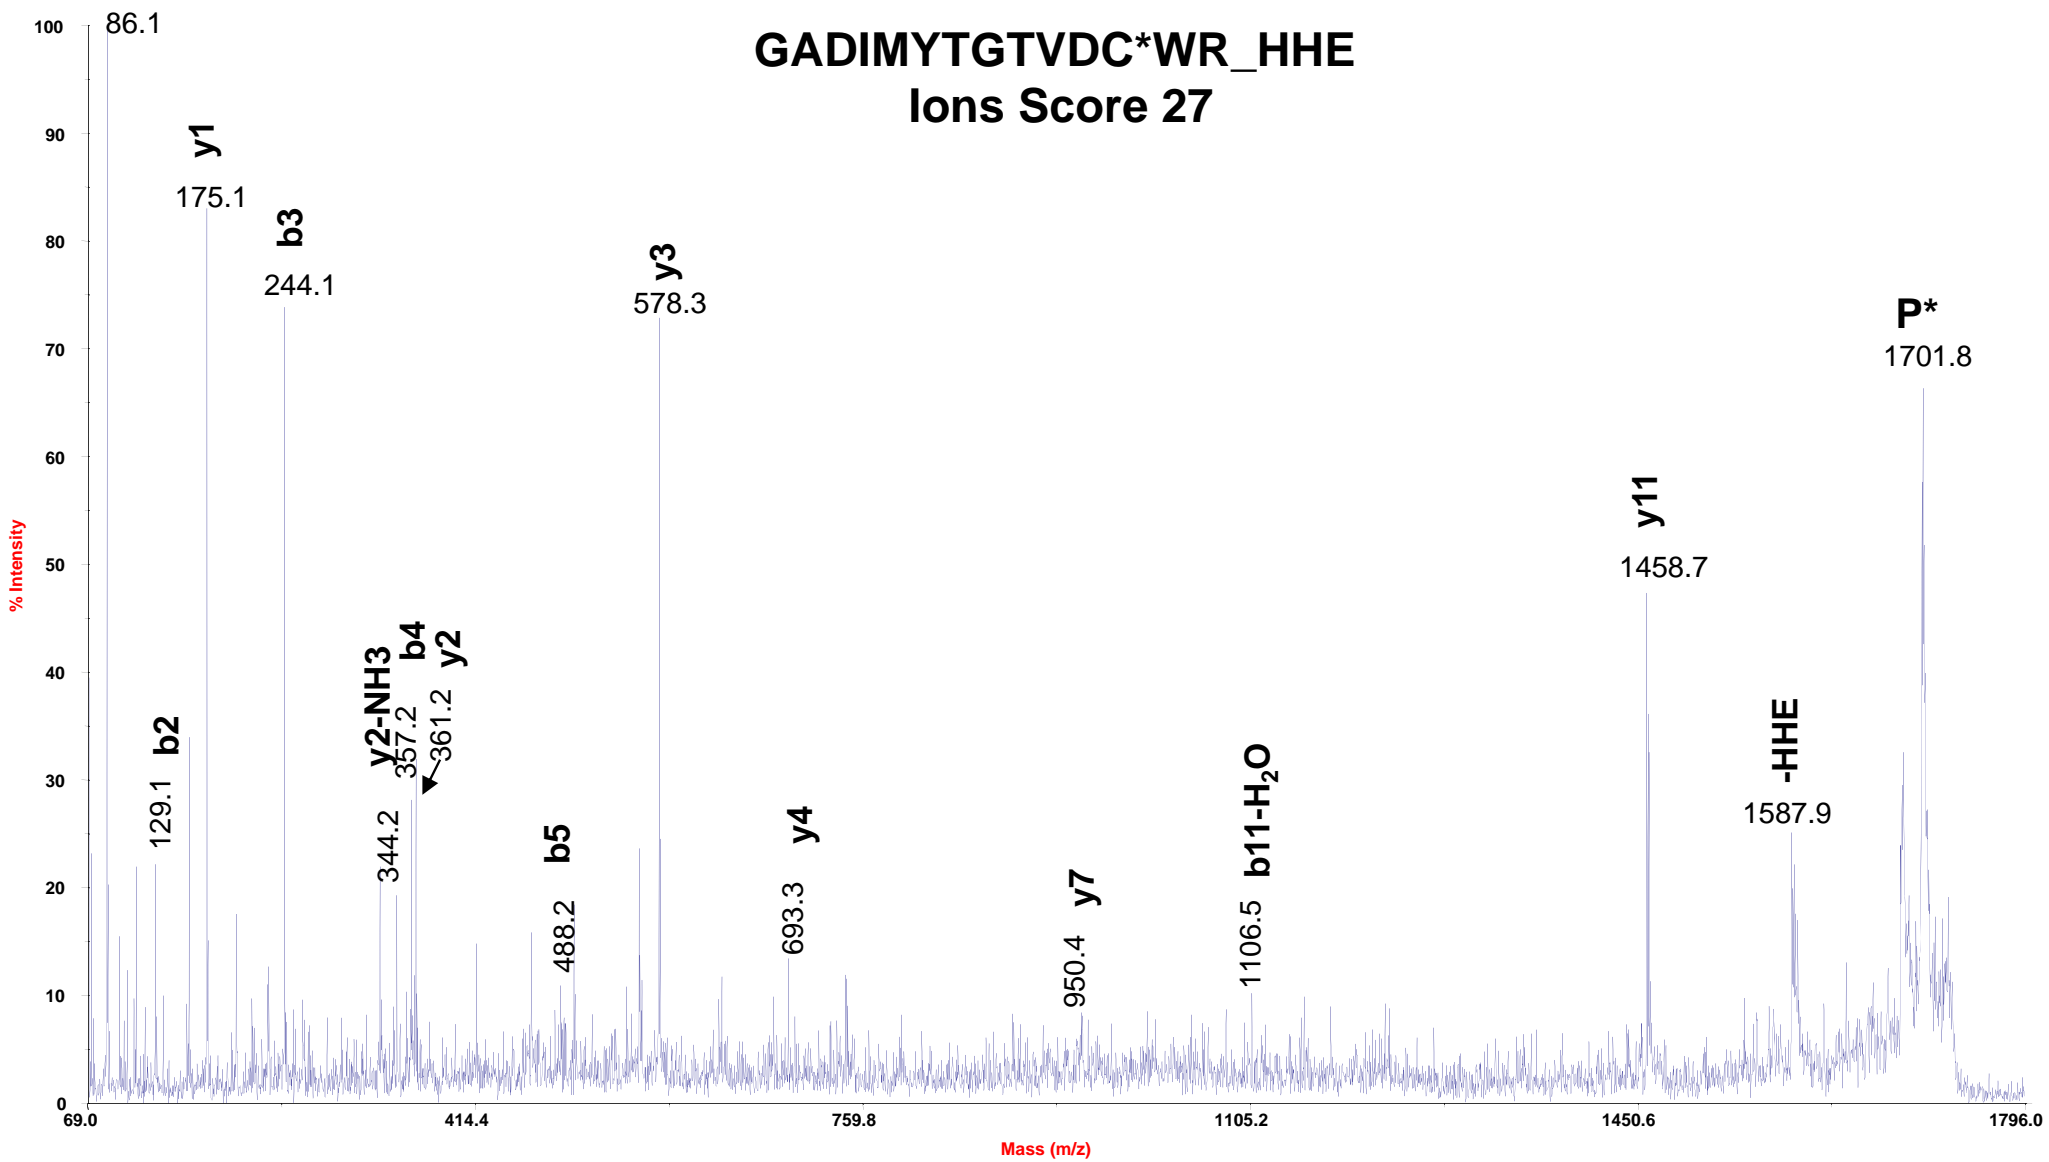

Figure S3-33  
4700 MS/MS Precursor 1252.59

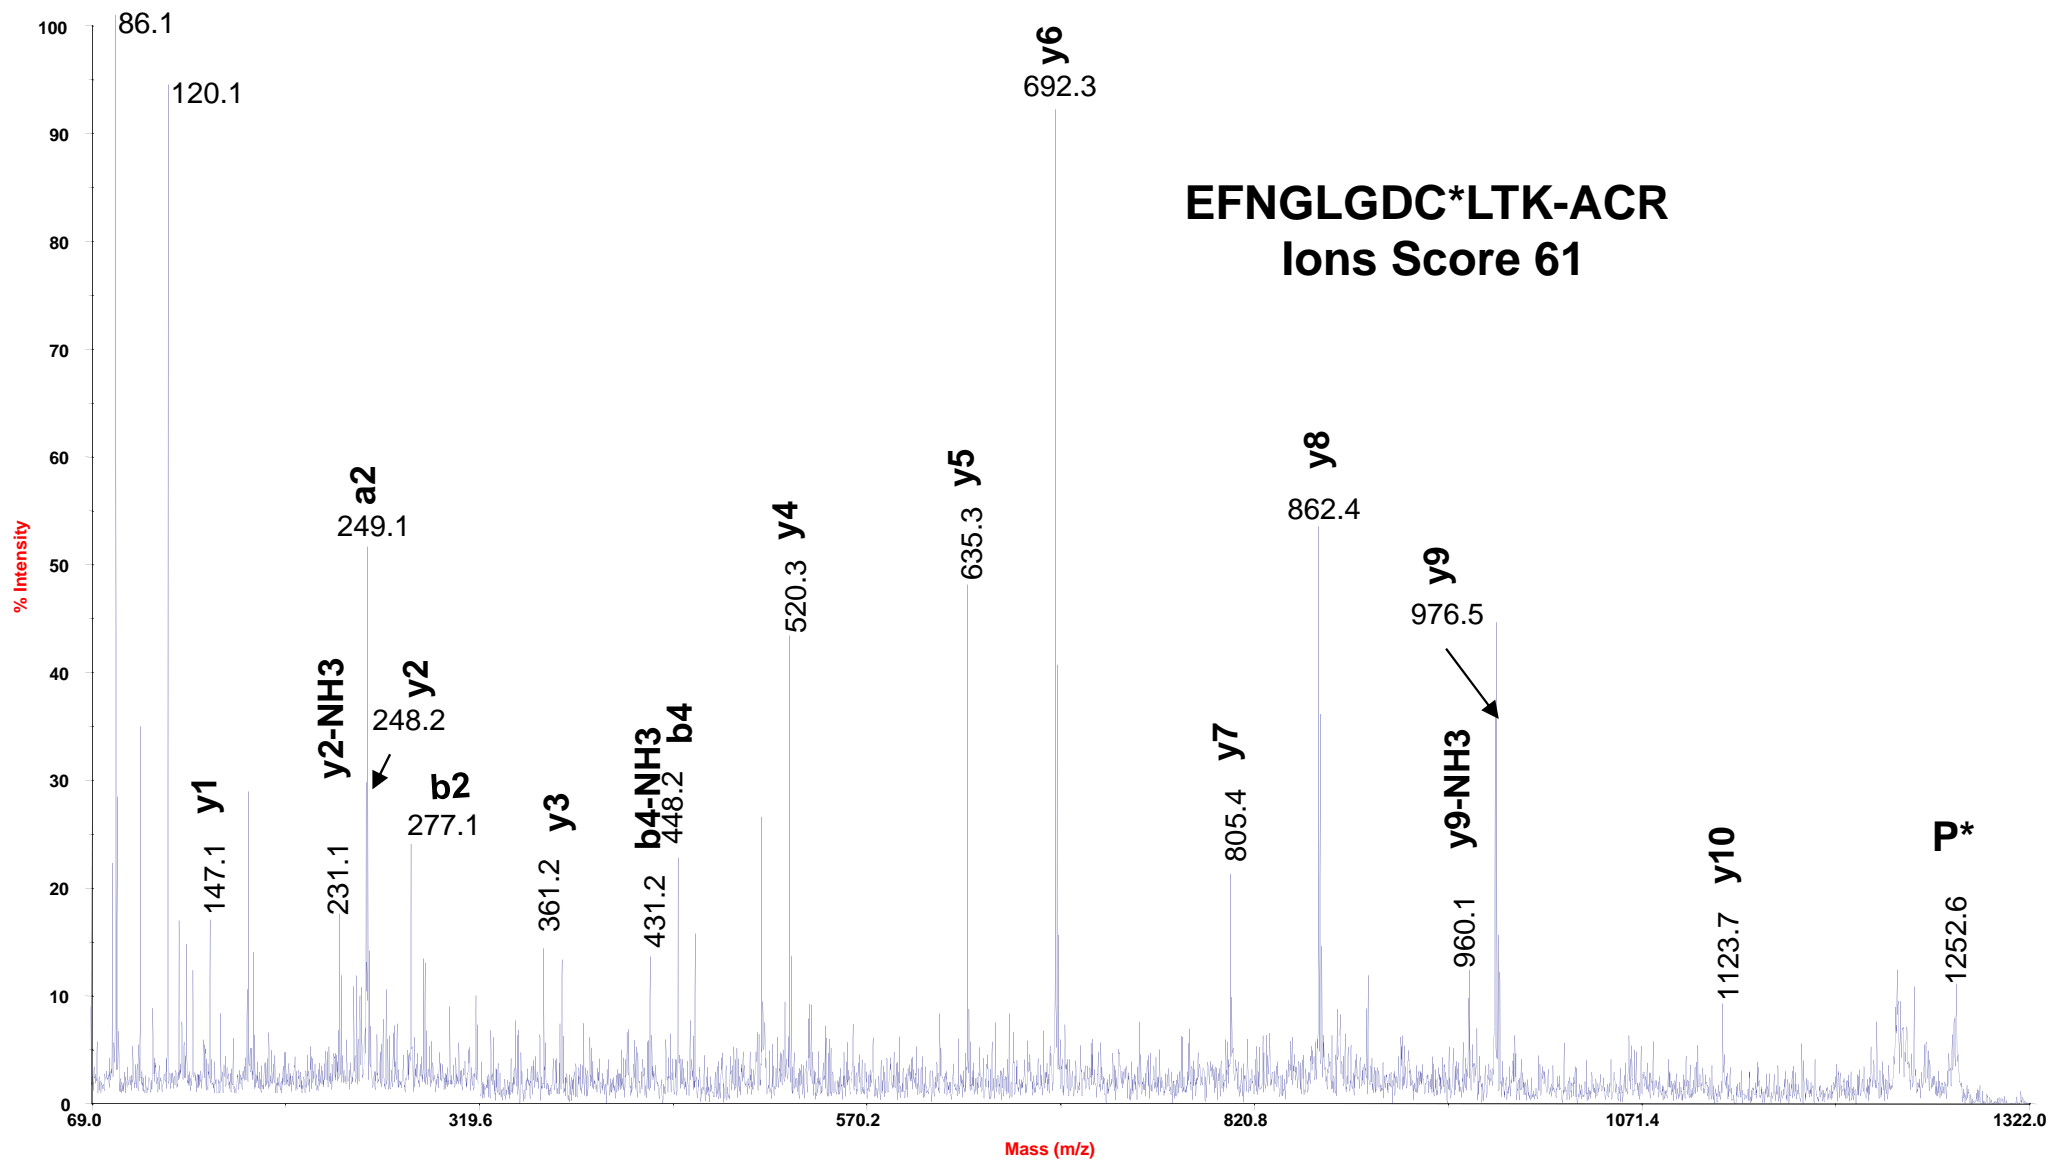

Figure S3-34  
4700 MS/MS Precursor 2127.06

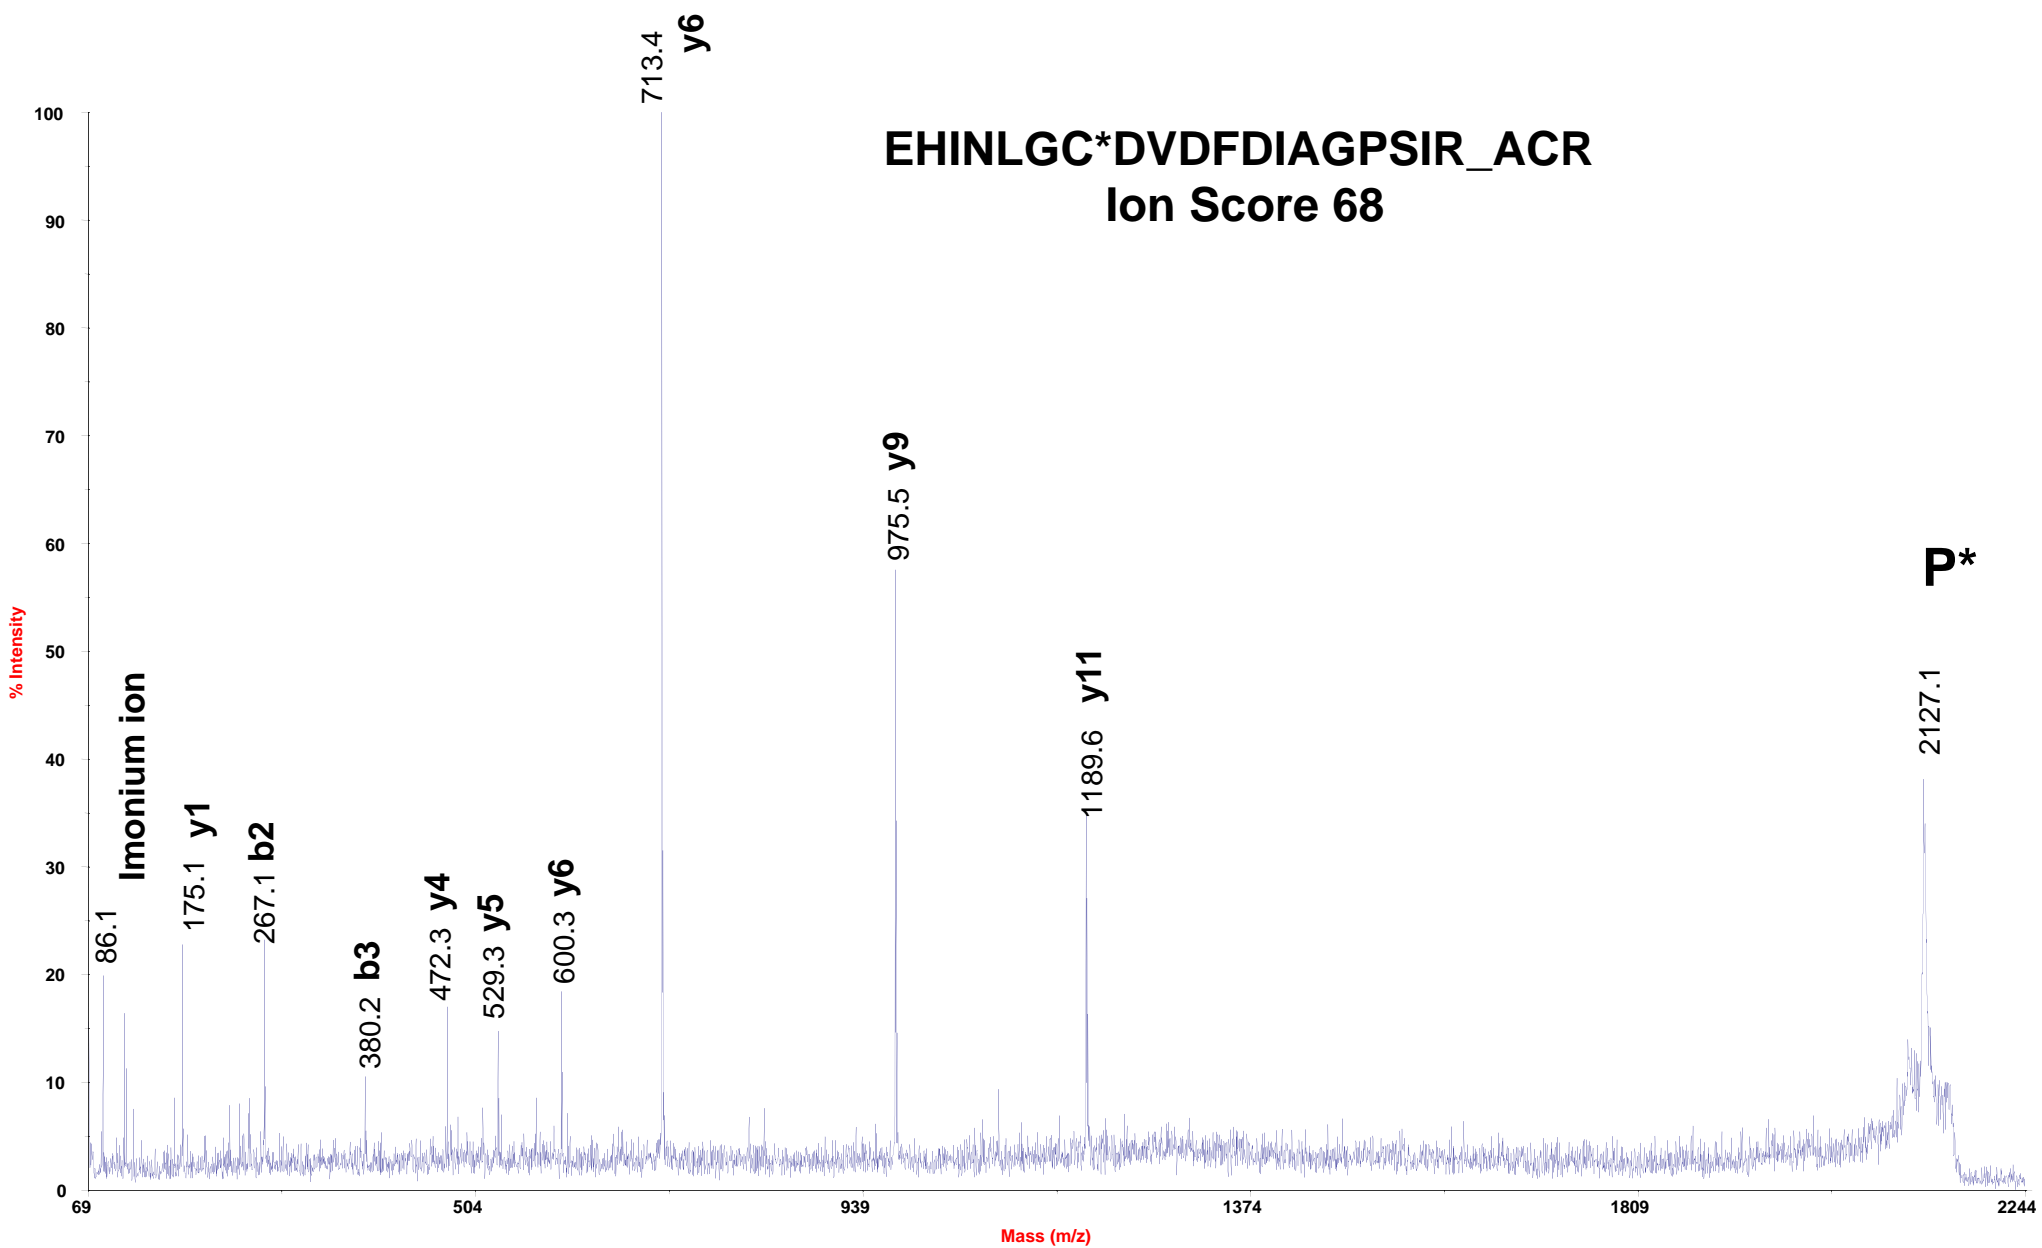

Supplement: NIHMS407876-supplement-01.pdf [file NIHMS407876-supplement-01.pdf]
